# Supplementary material for: Synthesis and reductive elimination of arylPd(ii) trifluoromethyl complexes: a remarkable concentration effect on chemoselectivity
Source: Royal Society of Chemistry journal article supplement (doi:10.1039/c6cp07093k), 2016-01-01
Supplement: c6cp07093k1.pdf [file c6cp07093k1.pdf]

## Electronic Supplementary Information

### Synthesis and Reductive Elimination of ArylPd(II) Trifluoromethyl Complexes: A Remarkable Concentration Effect on Chemoselectivity

Song-Lin Zhang\* and Zhu-Qin Deng

*The Key Laboratory of Food Colloids and Biotechnology, Ministry of Education,  
School of Chemical and Material Engineering, Jiangnan University, Wuxi 214122,  
Jiangsu Province*

E-mail: [slzhang@jiangnan.edu.cn](mailto:slzhang@jiangnan.edu.cn)

#### Contents

|                                                                                  |     |
|----------------------------------------------------------------------------------|-----|
| 1. General experimental details -----                                            | S1  |
| 2. Synthesis and characterization of complexes <b>1a-c</b> and <b>2a-c</b> ----- | S2  |
| 3. X-ray crystallographic study of <b>2c</b> -----                               | S17 |
| 4. Thermal decomposition study-----                                              | S29 |
| 5. DFT computational study-----                                                  | S32 |

## 1. General experimental details

All chemicals were purchased commercially. The solvents were simply dried over  $\text{Na}_2\text{SO}_4$  before use to extrude adventitious water. Other reactants were used as received without further purification. All the reactions were performed in a Schlenk tube under a  $\text{N}_2$  atmosphere which was realized through evacuation/back-fill techniques after three times.  $^1\text{H}$  NMR spectra were recorded on a 400 MHz spectrometer in deuterated  $\text{CDCl}_3$  or  $\text{DMSO-}d_6$  or  $\text{CD}_2\text{Cl}_2$  solvent;  $^{19}\text{F}$  NMR were recorded with 376 MHz;  $^{31}\text{P}$  NMR were recorded with 162 MHz. All the NMR spectra were processed with MestReNova program. Chemical shifts are reported in ppm and referenced to residual solvent peaks. Coupling constants are reported in hertz for fine splitting of signals where applicable. HRMS data was obtained using MALDI SYNAPT Q-TOF MS spectrometer to determine the accurate molecular weight. UV-vis absorption and emission experiments were done on a fluorescence spectrometer TU-1901.

## 2. Synthesis and characterization of complexes **1a-c** and **2a-c**

### 2.1 Complexes **1a** and **2a** with bpy as the ancillary ligand

**[(bpy)Pd(PhCF<sub>3</sub>)I] (1a):** Pd(dba)<sub>2</sub> (0.575g, 1.0 mmol) and 2,2'-bipyridine (0.31g, 2.0 mmol) were placed in an oven-dried 150-mL Schlenk tube equipped with a magnetic stir bar. The tube was sealed, evacuated and back-filled with nitrogen three times. A solution of 4-iodobenzotrifluoride (0.83g, 3.0 mmol) in THF (30mL) was then added by syringe. After stirring at 60 °C for 8h, the reaction mixture was filtered through a pad of Celite. The filtrate was then evaporated under reduced pressure to remove the solvent. The resulting residue was purified by column chromatography on silica gel (eluent: first petroleum ether/ethyl acetate = 20:1~5:1 (v/v), then CH<sub>2</sub>Cl<sub>2</sub>/ethyl acetate = 1:1 (v/v)) to provide yellow solid **1a**. After dried under vacuum overnight, **1a** was obtained in a yield of 0.38g, 71%. (Note: toluene as reaction solvent in place of THF is also effective, with a little lower yield of 62%).

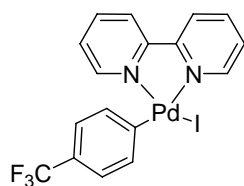

Complex **1a** (yellow solid). <sup>1</sup>H NMR (400 MHz, DMSO-*d*<sub>6</sub>) δ 9.38 (s, 1H), 8.63 (d, *J* = 7.7 Hz, 2H), 8.27 (t, *J* = 7.2 Hz, 2H), 7.79 (s, 1H), 7.67 (s, 1H), 7.54 (d, *J* = 7.4 Hz, 2H), 7.44 (s, 1H), 7.31 (d, *J* = 7.5 Hz, 2H). <sup>19</sup>F NMR (376 MHz, DMSO-*d*<sub>6</sub>) δ -60.1.

**Figure S1.**  $^1\text{H}$  NMR (400 MHz,  $\text{DMSO-}d_6$ ) spectrum of (**1a**) (signals at 3.34 and 2.51 ppm are residual DMSO solvent peaks)

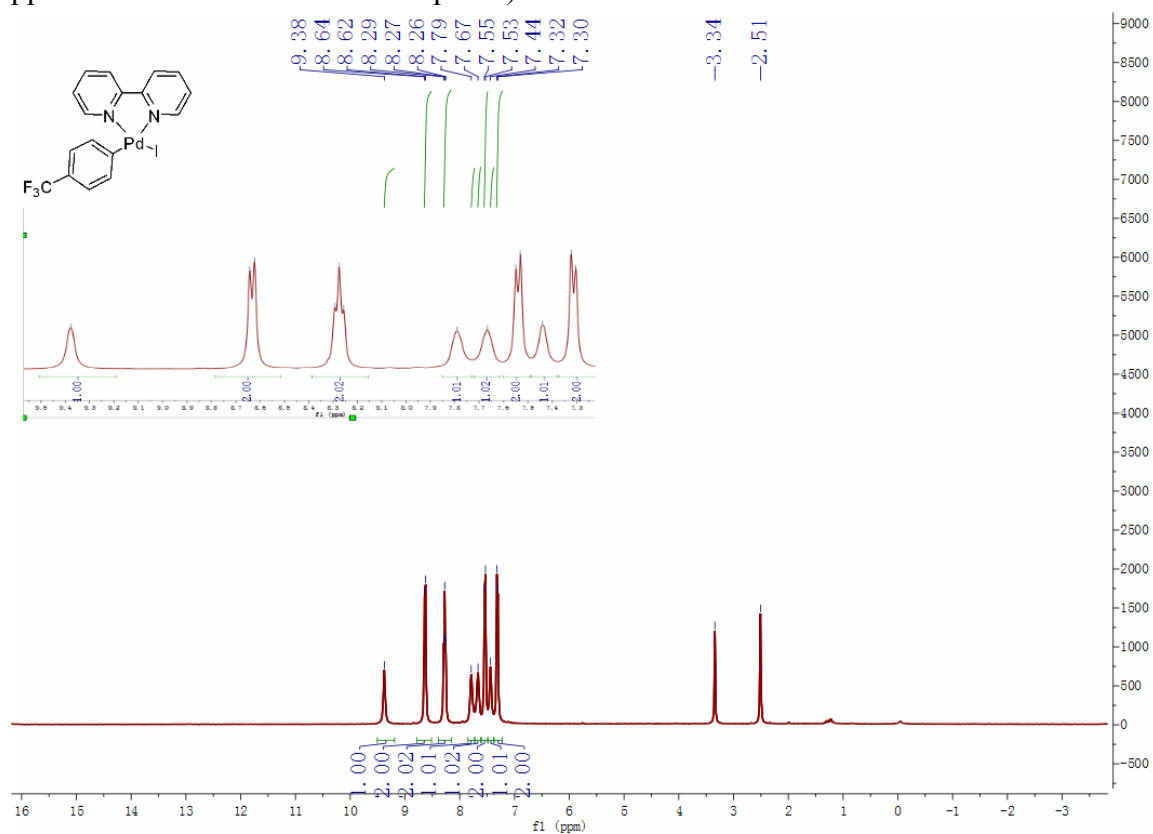

**Figure S2.**  $^{19}\text{F}$  NMR (376 MHz,  $\text{DMSO-}d_6$ ) spectrum of (**1a**)

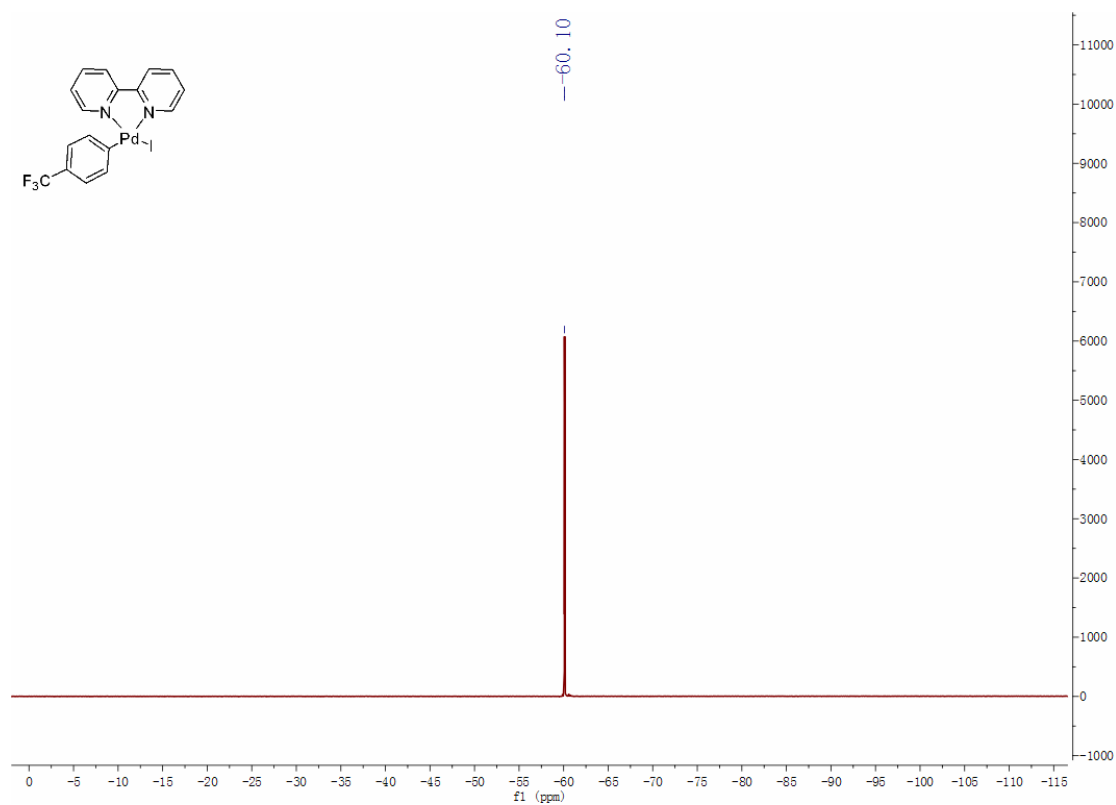

**[(bpy)Pd(PhCF<sub>3</sub>)CF<sub>3</sub>] (2a):** **1a** (0.267g, 0.50 mmol) and AgF (0.15g, 1.2 mmol) were placed in an oven-dried 50-mL Schlenk tube equipped with a magnetic stir bar. The tube was sealed, evacuated and back-filled with nitrogen three times. A solution of CF<sub>3</sub>SiMe<sub>3</sub> (0.5 mL, 3.4 mmol) in THF (8 mL) was added by syringe. After stirring at 25°C for 3h, the reaction mixture was filtered through a pad of Celite. The filtrate was then evaporated under reduced pressure to remove the solvent. The resulting residue was purified by column chromatography on silica gel with eluent: petroleum ether/ethyl acetate = 20:1~5:1 (v/v), then CH<sub>2</sub>Cl<sub>2</sub>/ethyl acetate = 1:1 (v/v) to provide light yellow solid **2a**. After dried under vacuum overnight, **2a** was obtained in a yield of 0.165 g (69%).

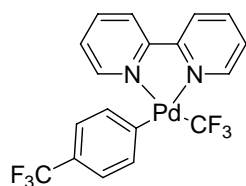

**2a** (light yellow solid). <sup>1</sup>H NMR (400 MHz, CDCl<sub>3</sub>) δ 9.17 (s, 1H), 8.17 – 8.05 (m, 3H), 8.02 – 7.95 (m, 1H), 7.78 (d, *J* = 7.7 Hz, 2H), 7.70 (d, *J* = 5.1 Hz, 1H), 7.65 – 7.56 (m, 1H), 7.43 – 7.27 (m, 3H). <sup>19</sup>F NMR (376 MHz, CDCl<sub>3</sub>) δ -21.0 (s), -61.7 (s).

**Figure S3.**  $^1\text{H}$  NMR (400 MHz,  $\text{CDCl}_3$ ) spectrum of (**2a**)

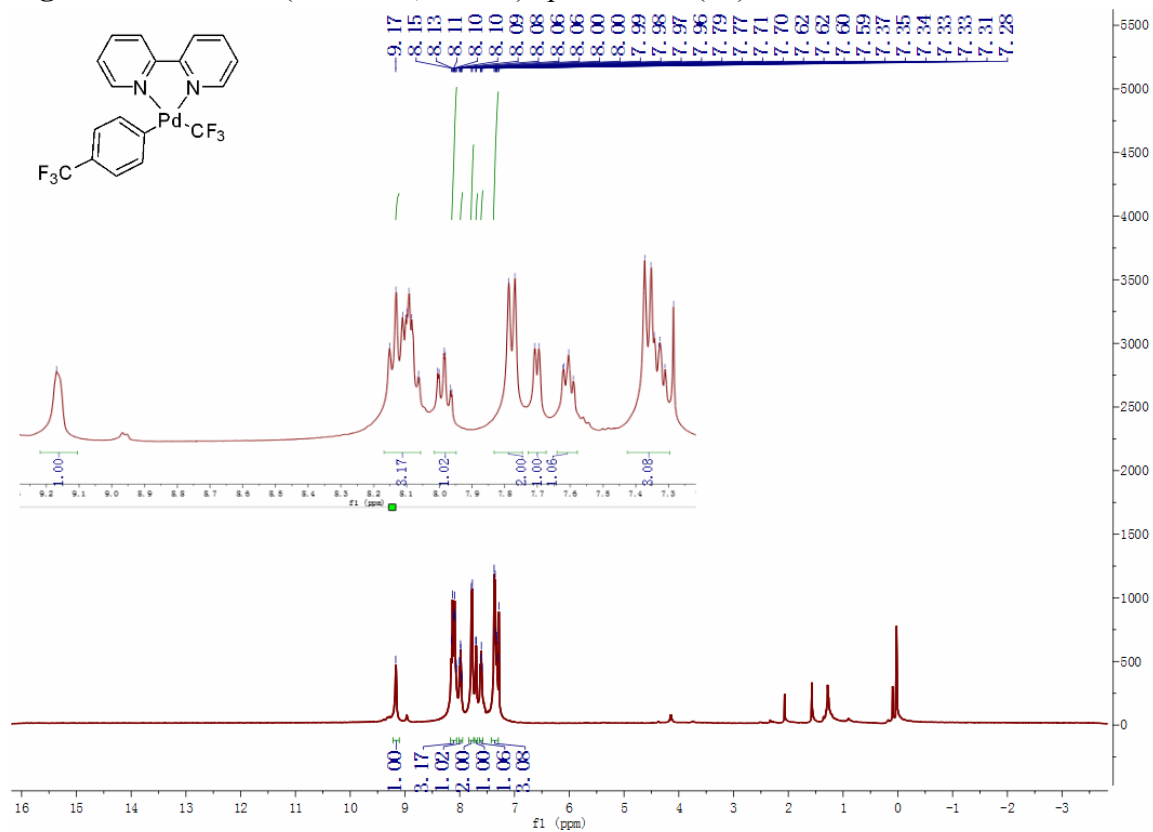

**Figure S4.**  $^{19}\text{F}$  NMR (376 MHz,  $\text{CDCl}_3$ ) spectrum of (**2a**)

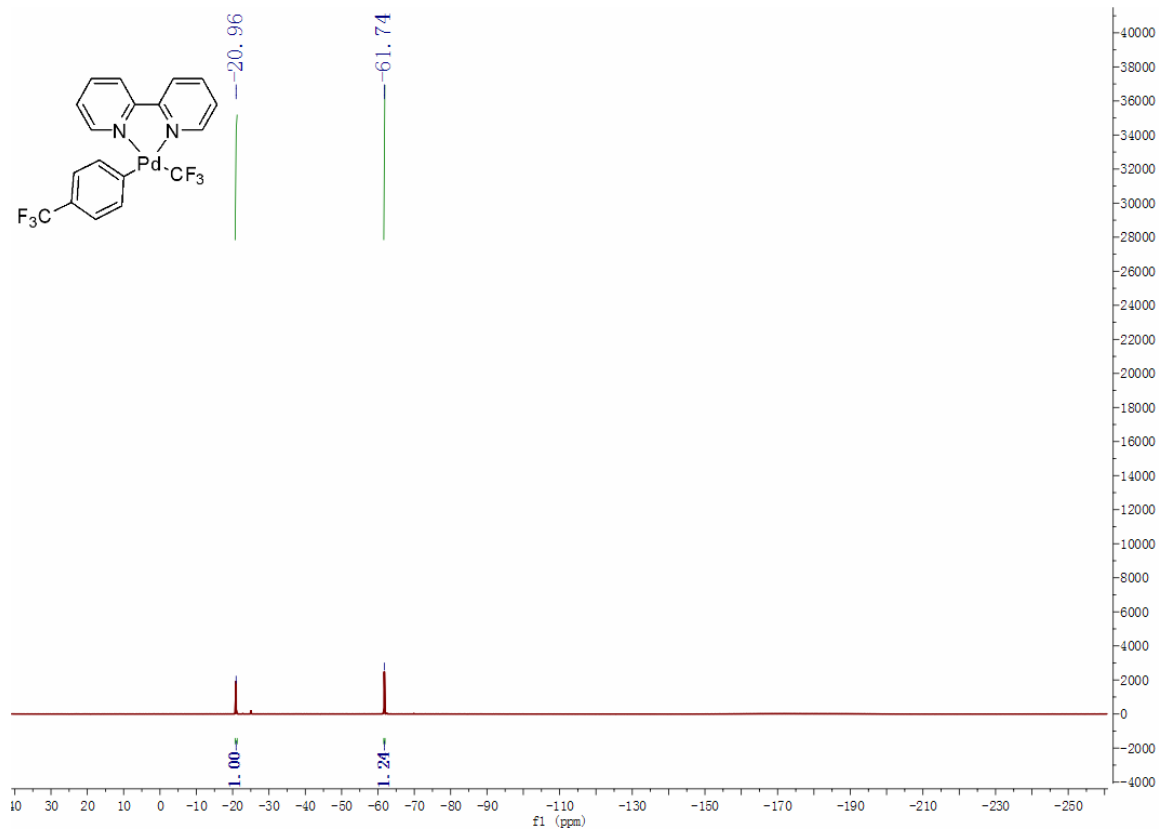

## 2.2 Complexes **1b** and **2b** with BINAP as the ancillary ligand

[(BINAP)Pd(PhCF<sub>3</sub>)I] (**1b**): Pd(dba)<sub>2</sub> (0.575g, 1.0 mmol) and BINAP (1.25g, 2.0 mmol) were placed in a dry 150-mL Schlenk tube equipped with a magnetic stir bar. The tube was evacuated and back-filled with nitrogen three times. Under nitrogen, 4-Iodobenzotrifluoride (0.83g, 3.0 mmol) in toluene (30mL) was added. After stirring at 25°C for 8h, the reaction mixture was filtered through a pad of Celite, and the solvent was removed under reduced pressure. The resulting residue was purified by column chromatography on silica gel eluent: V(petroleum ether)/V(ethyl acetate) = 20:1~1:1 to provide yellow solid **1b**, and dried under vacuum overnight.

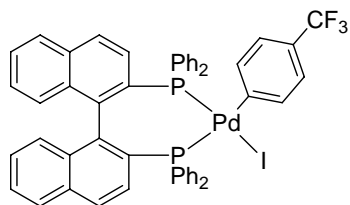

Complex **1b** (yellow solid, 0.52g, 52%). <sup>1</sup>H NMR (400 MHz, CDCl<sub>3</sub>) δ 8.02 – 7.95 (m, 1H), 7.82 – 7.74 (m, 3H), 7.68 – 7.49 (m, 9H), 7.43 – 7.30 (m, 5H), 7.21 – 7.06 (m, 5H), 7.04 – 6.89 (m, 6H), 6.80 – 6.64 (m, 4H), 6.60 – 6.48 (m, 3H). <sup>19</sup>F NMR (376 MHz, CDCl<sub>3</sub>) δ -61.8 (s). <sup>31</sup>P NMR (162 MHz, CDCl<sub>3</sub>) δ 22.09 (d, *J* = 39.9 Hz, 1P), 9.85 (d, *J* = 39.9 Hz, 1P).

**Figure S5.**  $^1\text{H}$  NMR (400 MHz,  $\text{CDCl}_3$ ) spectrum of (**1b**)

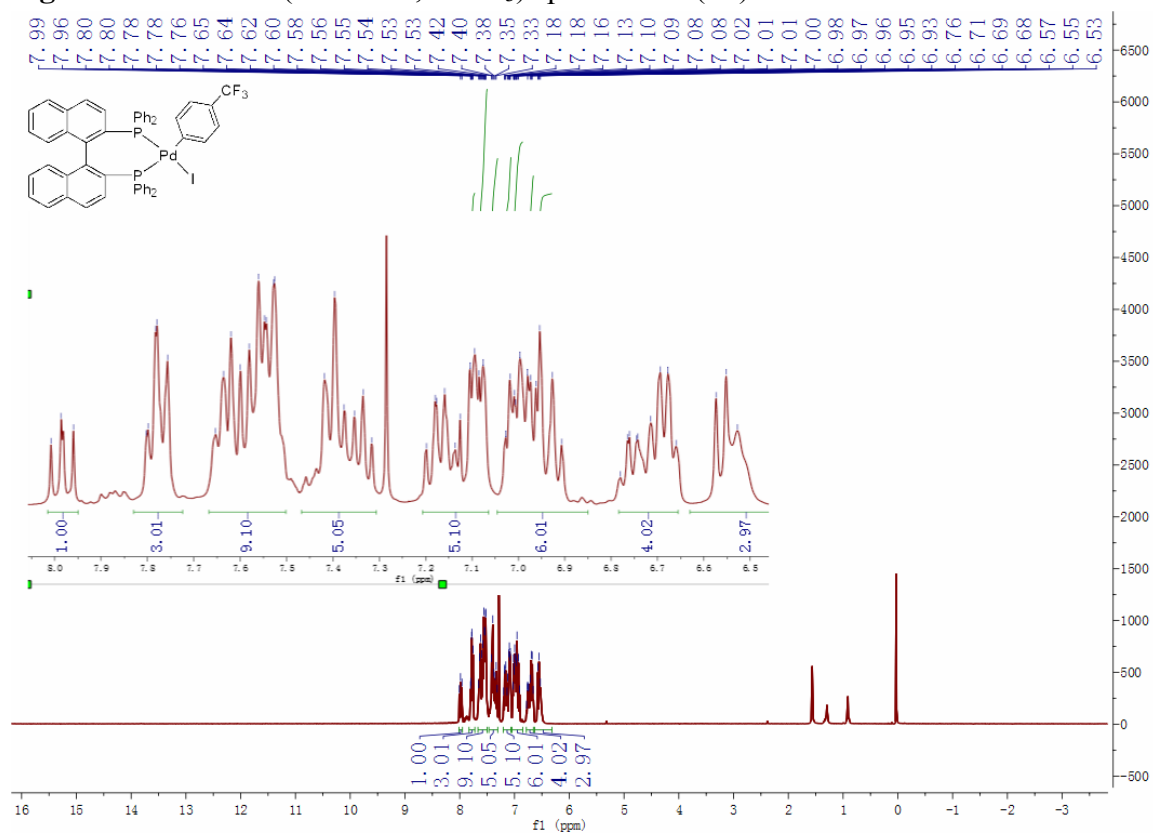

**Figure S6.**  $^{19}\text{F}$  NMR (376 MHz,  $\text{CDCl}_3$ ) spectrum of (**1b**)

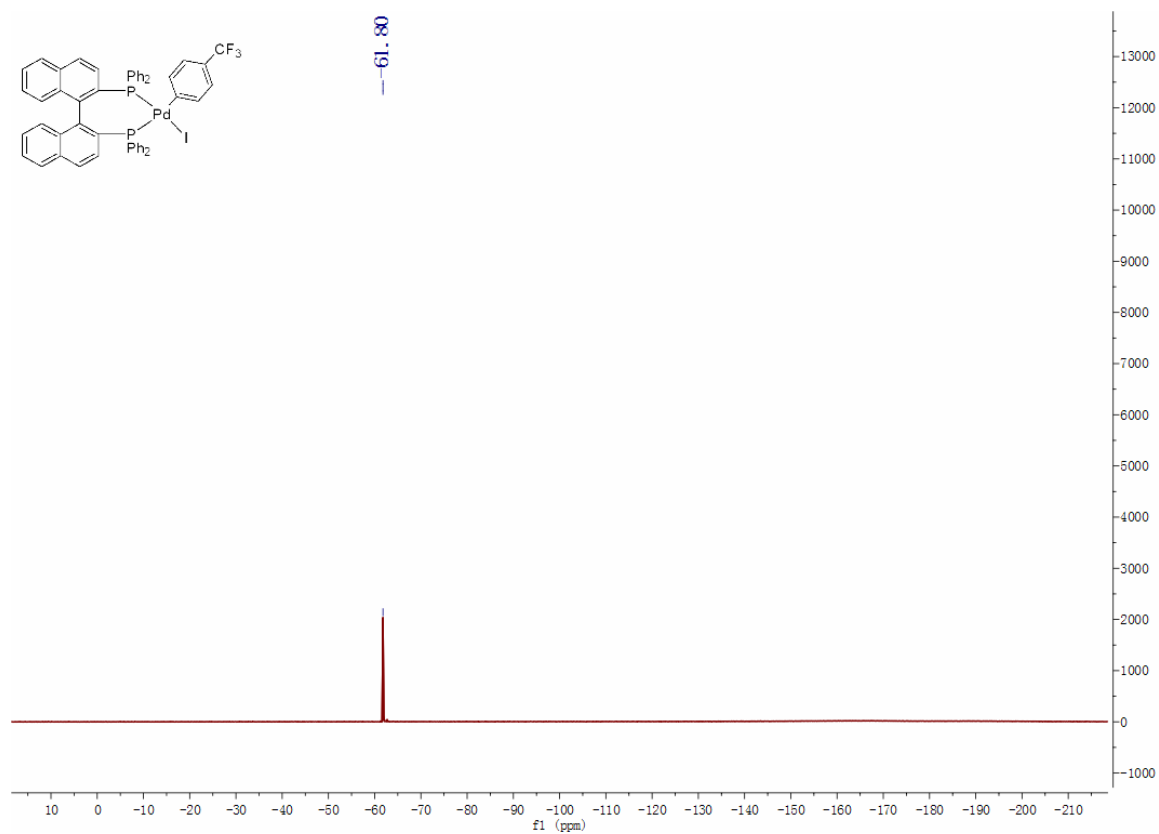



**Figure S7.**  $^{31}\text{P}$  NMR (162 MHz,  $\text{CDCl}_3$ ) spectrum of (**1b**)

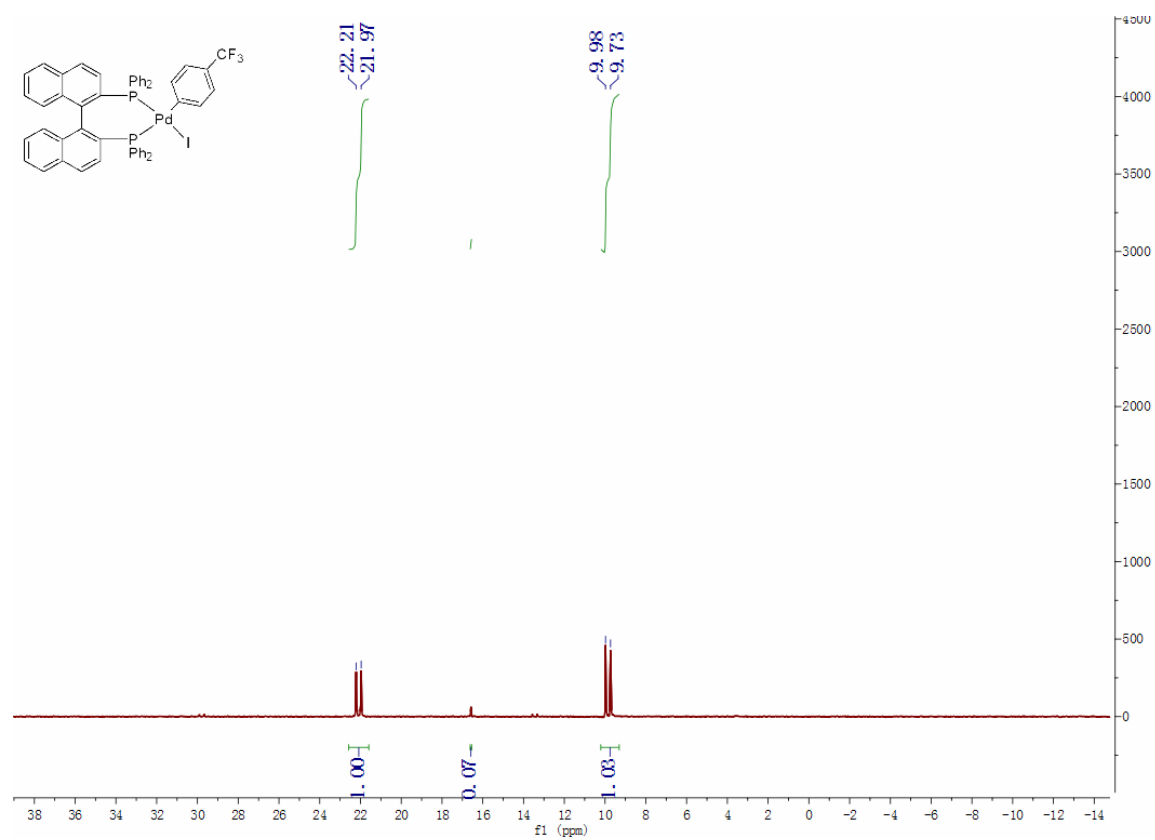

[(BINAP)Pd(PhCF<sub>3</sub>)CF<sub>3</sub>] (**2b**): **1b** (0.5g, 0.5 mmol) and AgF (0.15g, 1.2mmol) were placed in a dry 50-mL Schlenk tube equipped with a magnetic stir bar. The tube was evacuated and back-filled with nitrogen three times. Under nitrogen, CF<sub>3</sub>SiMe<sub>3</sub> (0.5mL, 3.4 mmol) in benzene (8mL) was added. After stirring at 25°C for 5h, the reaction mixture was filtered through a pad of Celite and the volume of the filtrate reduced to a half. An equal amount of hexanes was added and the resulting solution was left overnight at *ca* 0°C to give a dark yellow solid **2b**, thoroughly washed with hexanes, and dried under vacuum overnight. The yield of **2b** was 0.34 g (72%).

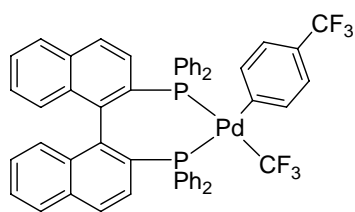

Complex **2b** (dark yellow, 0.34g, 72%). <sup>1</sup>H NMR (400 MHz, CDCl<sub>3</sub>) δ 7.95 – 7.82 (m, 4H), 7.74 (t, *J* = 6.0 Hz, 1H), 7.64 – 7.47 (m, 9H), 7.42 – 7.29 (m, 8H), 7.23 – 7.15 (m, 2H), 7.06 – 7.00 (m, 2H), 6.99 – 6.89 (m, 1H), 6.80 (t, *J* = 8.0 Hz, 2H), 6.75 – 6.61 (m, 4H), 6.57 (d, *J* = 8.6 Hz, 2H), 6.4-6.5 (br s, 1H). <sup>19</sup>F NMR (376 MHz, CDCl<sub>3</sub>) δ -19.65 (dd, *J* = 49.8, 17.2 Hz), -20.70 – -21.14 (m), -61.7 (s). <sup>31</sup>P NMR (162 MHz, CDCl<sub>3</sub>) δ 21.44 (m 1P); 19.48 (m, 4P); 16.88 (m, 1P).

**Figure S8.**  $^1\text{H}$  NMR (400 MHz,  $\text{CDCl}_3$ ) spectrum of (**2b**)

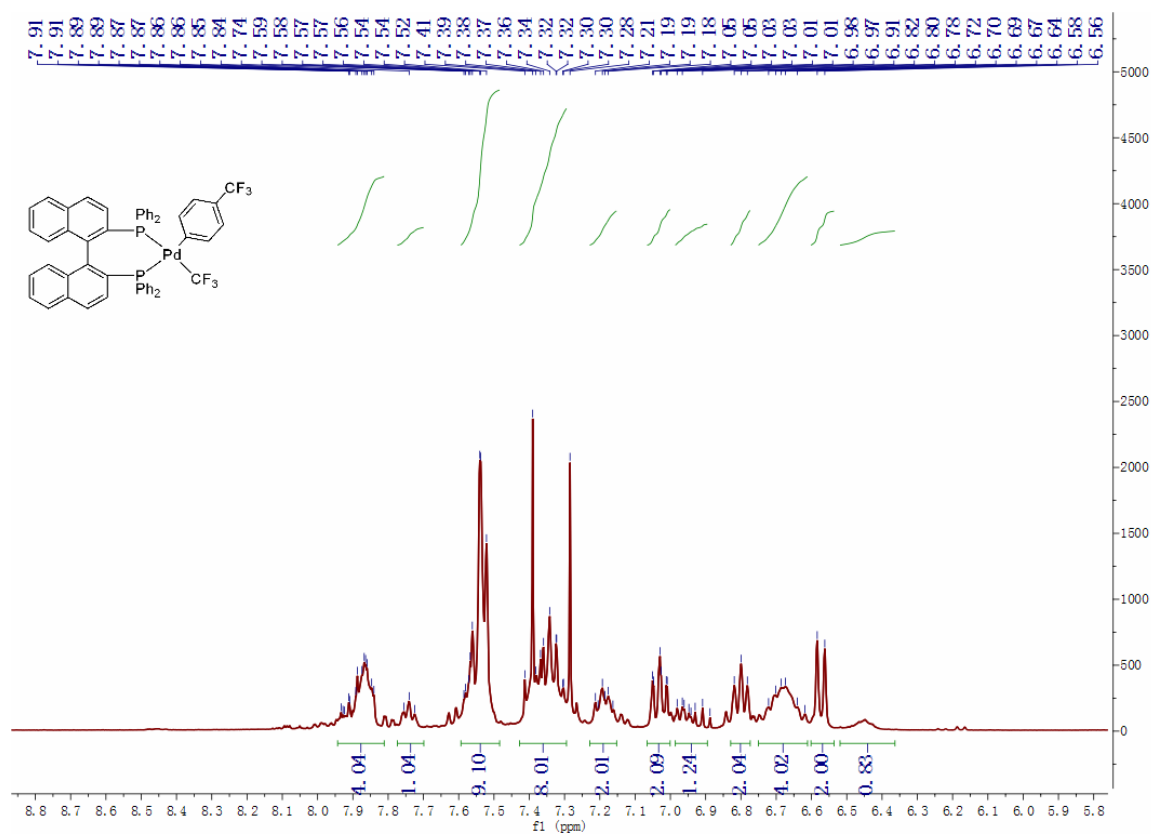

**Figure S9.**  $^{19}\text{F}$  NMR (376 MHz,  $\text{CDCl}_3$ ) spectrum of (**2b**)

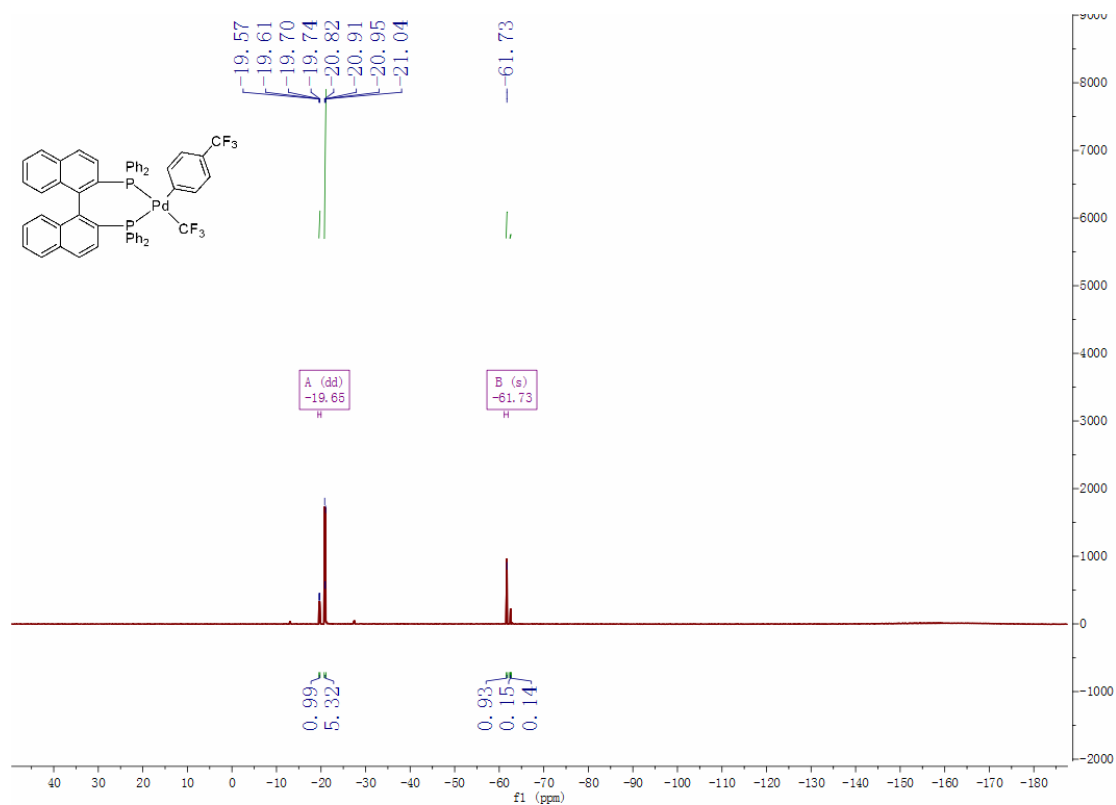

**Figure S10.**  $^{31}\text{P}$  NMR (162 MHz,  $\text{CDCl}_3$ ) spectrum of (**2b**)

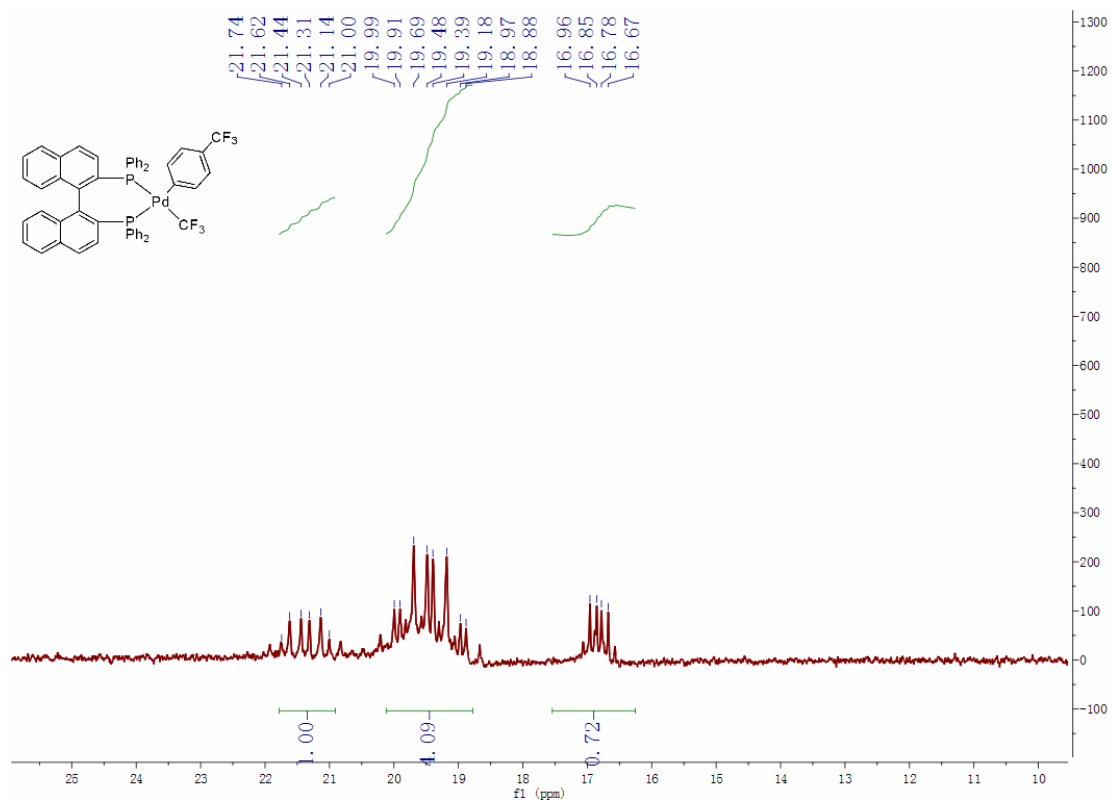

### 2.3 Complexes **1c** and **2c** with Xantphos as the ancillary ligand

[(Xantphos)Pd(PhCF<sub>3</sub>)I] (**1c**): Pd(dba)<sub>2</sub> (0.575g, 1.0 mmol) and Xantphos (1.16g, 2.0 mmol) were placed in an oven-dried 150-mL Schlenk tube equipped with a magnetic stir bar. The tube was sealed, evacuated and back-filled with nitrogen three times. A solution of 4-iodobenzotrifluoride (0.83g, 3.0 mmol) in toluene (30mL) was then added by syringe. After stirring at 25°C for 2h, the reaction mixture was filtered through a pad of Celite. The filtrate was then evaporated under reduced pressure to remove the solvent. The resulting residue was purified by column chromatography on silica gel (eluent: petroleum ether/ethyl acetate = 20:1~5:1 (v/v)) to provide yellow solid of **1c**. After dried under vacuum overnight, **1c** was obtained in a yield of 0.593 g, 62%.

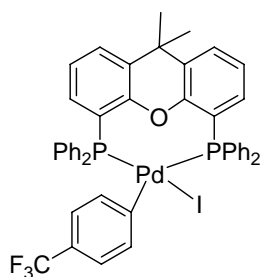

Complex **1c** (yellow solid, *trans*-isomer, 0.593 g, 62% yield). <sup>1</sup>H NMR (400MHz, CDCl<sub>3</sub>), δ 7.65 (dd, *J* = 7.6, 1.4 Hz, 2H), 7.48 – 7.08 (m, 24H), 6.65 (s, 2H), 6.34 (d, *J* = 7.9 Hz, 2H), 1.83 (s, 6H). <sup>19</sup>F NMR (376 MHz, CD<sub>2</sub>Cl<sub>2</sub>) δ -62.3(s). <sup>31</sup>P NMR (162 MHz, CDCl<sub>3</sub>) δ 9.5 (s).

**Figure S11.**  $^1\text{H}$  NMR spectrum of (**1c**)

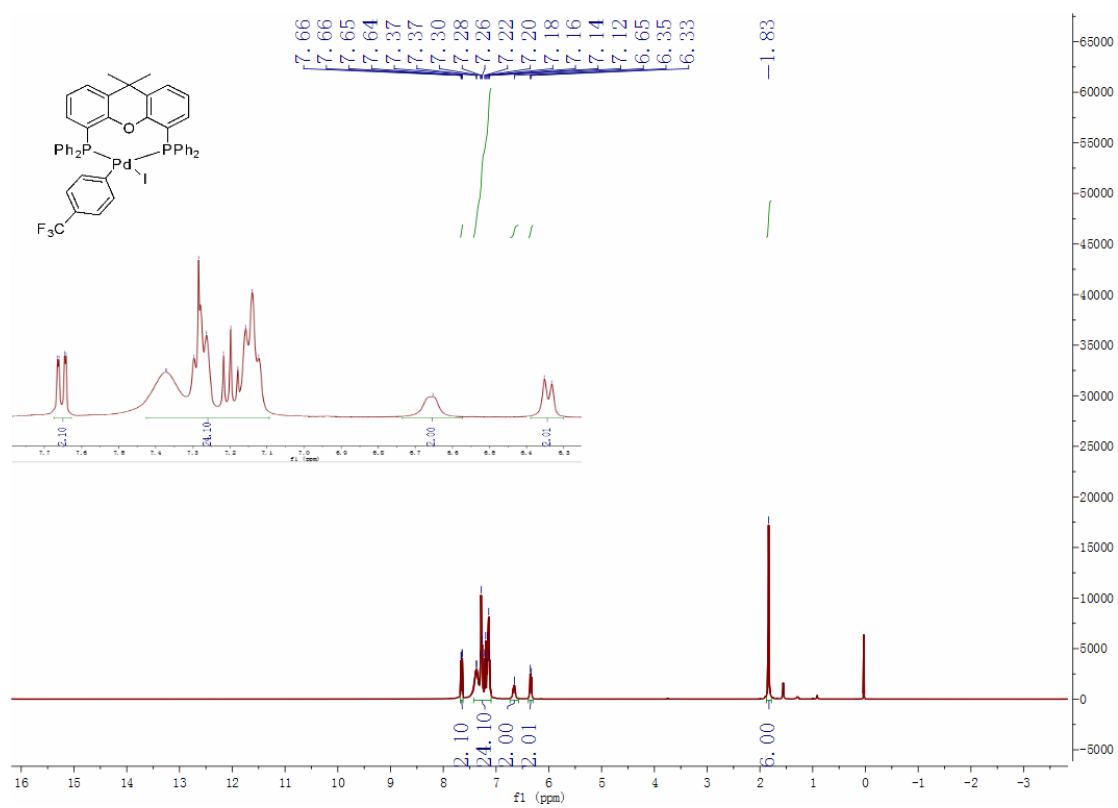

**Figure S12.**  $^{19}\text{F}$  NMR spectrum of (**1c**)

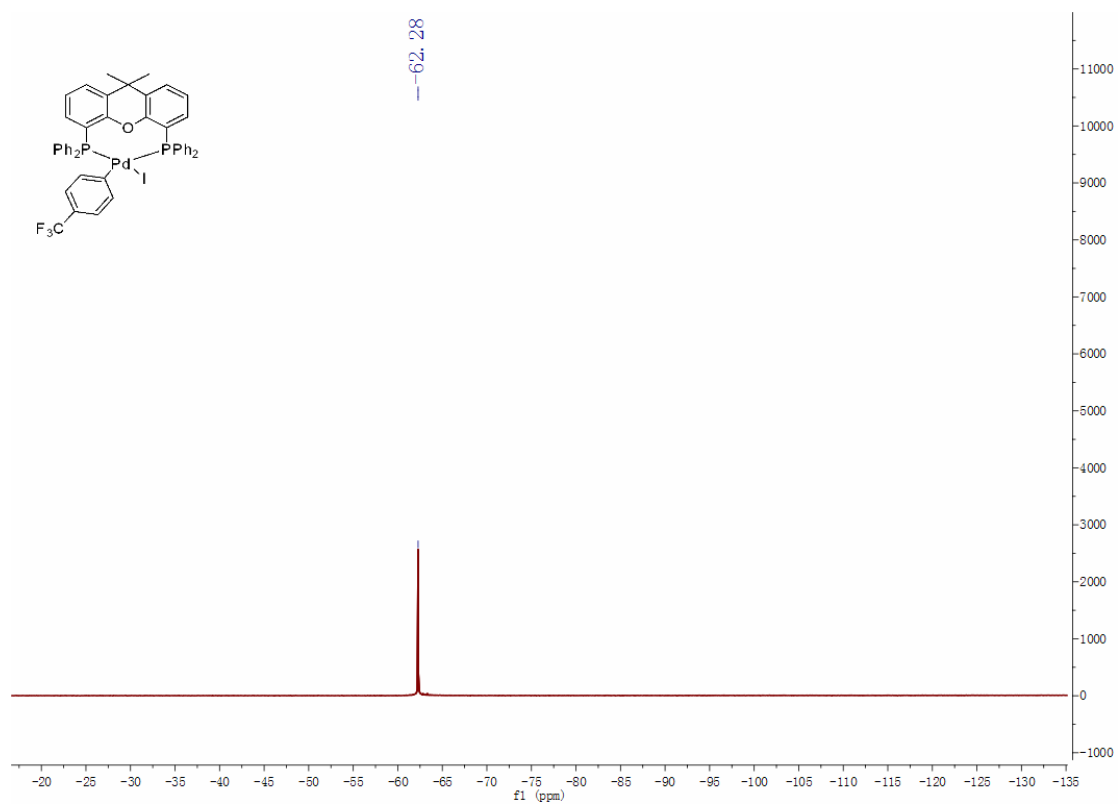

**Figure S13.**  $^{31}\text{P}$  NMR spectrum of (**1c**)

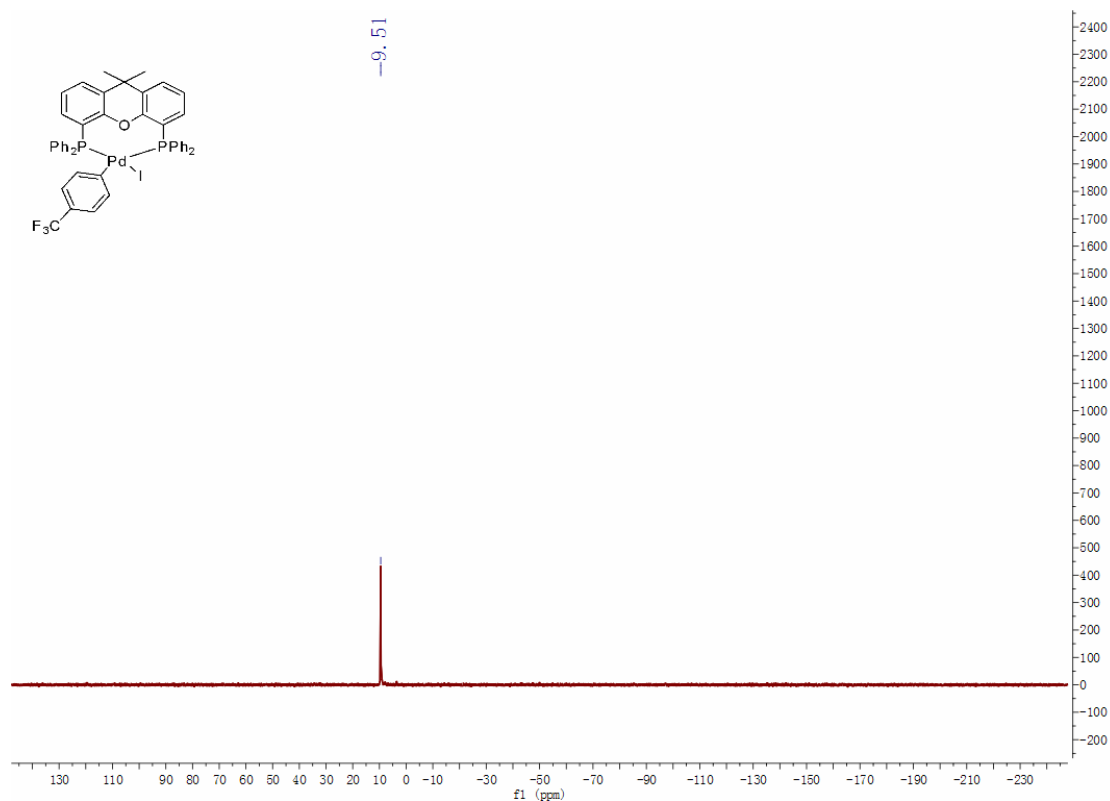

**[(Xantphos)Pd(PhCF<sub>3</sub>)CF<sub>3</sub>] (2c):** **1c** (0.478g, 0.5 mmol) and AgF (0.15g, 1.2 mmol) were placed in an oven-dried 50-mL Schlenk tube equipped with a magnetic stir bar. The tube was sealed, evacuated and back-filled with nitrogen three times. A solution of CF<sub>3</sub>SiMe<sub>3</sub> (0.5 mL, 3.4 mmol) in benzene (8 mL) was then added by syringe. After stirring at 25°C for 3h, the reaction mixture was filtered through a pad of Celite. The filtrate was then evaporated under reduced pressure to remove the solvent. The resulting residue was dissolved in CH<sub>2</sub>Cl<sub>2</sub>, and hexanes (*ca* 15 mL) was added. Then, the solution was kept at +0°C in the refrigerator for more than 12 hours. The yellow crystals of **2c** were separated, thoroughly washed with hexanes, and dried under vacuum overnight. The yield of **2c** was 0.30 g (67%).

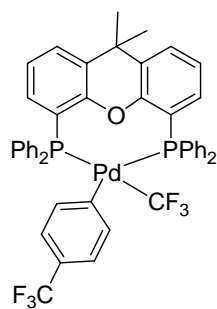

Complex **2c** (yellow solid, a mixture of *cis* and *trans*-isomers in a ratio of *ca* 16:1 with *cis*-isomer dominant as determined by  $^{19}\text{F}$  and  $^{31}\text{P}$  NMR).  $^1\text{H}$  NMR (400 MHz,  $\text{CD}_2\text{Cl}_2$ ):  $\delta$  8.00 – 7.50 (m, 4H), 7.48 – 6.76 (m, 26 H), 1.79 (s, 4H), 1.59 (s, 2H).  $^{19}\text{F}$  NMR (376 MHz,  $\text{CD}_2\text{Cl}_2$ ) -62.05 (s, aromatic  $\text{CF}_3$ ), for *trans*-**2c**,  $\delta$  -13.80 (t,  $J$  = 17.0 Hz, Pd-bound  $\text{CF}_3$ ); for *cis*-**2c**,  $\delta$ -15.63 (dd,  $J$  = 45.8, 17.0 Hz, Pd-bound  $\text{CF}_3$ ).  $^{31}\text{P}$  NMR (162 MHz,  $\text{CD}_2\text{Cl}_2$ ) for *trans*-**2c**,  $\delta$  16.1 (q,  $J$  = 16.4 Hz, 2P); for *cis*-**2c**,  $\delta$ : 4.2 (m, 16P); 8.4 (m, 16P). HRMS:  $m/z$  (M-F) $^+$  Calcd: 879.1213; Found: 879.1246.

**Figure S14.**  $^1\text{H}$  NMR spectrum of (**2c**)

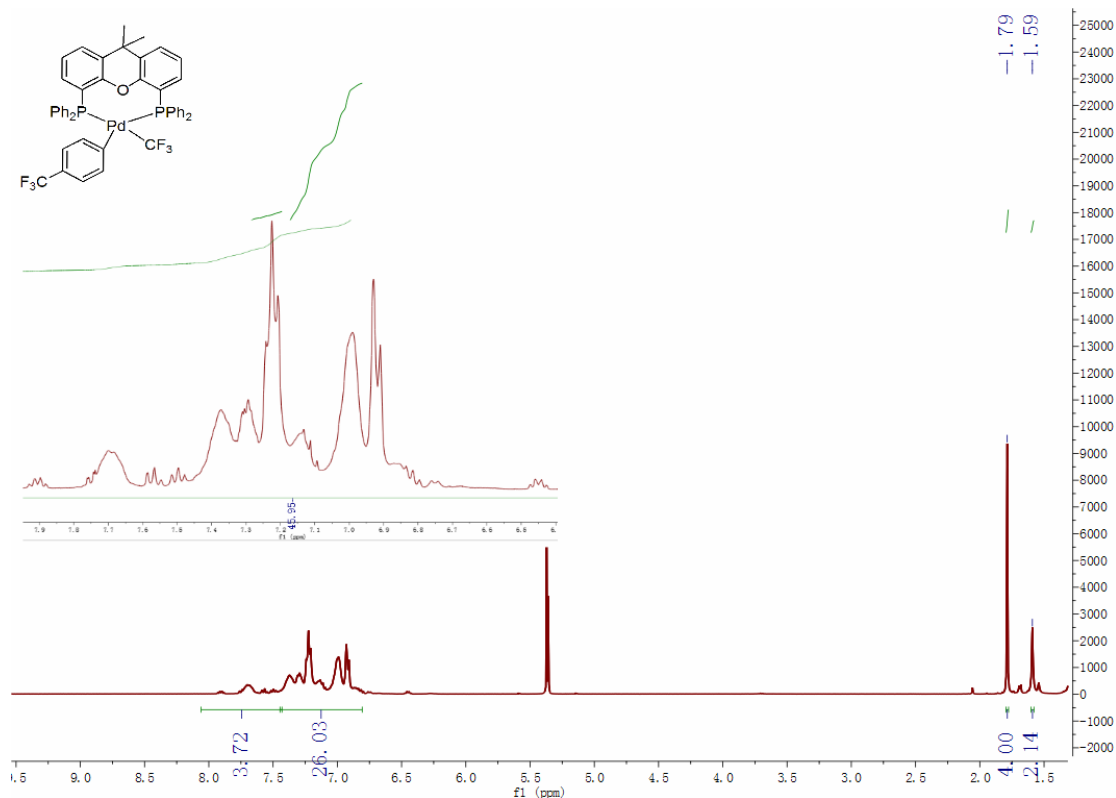



**Figure S15.**  $^{19}\text{F}$  NMR spectrum of (**2c**) (the ratio of cis/trans isomers is ca 16:1)

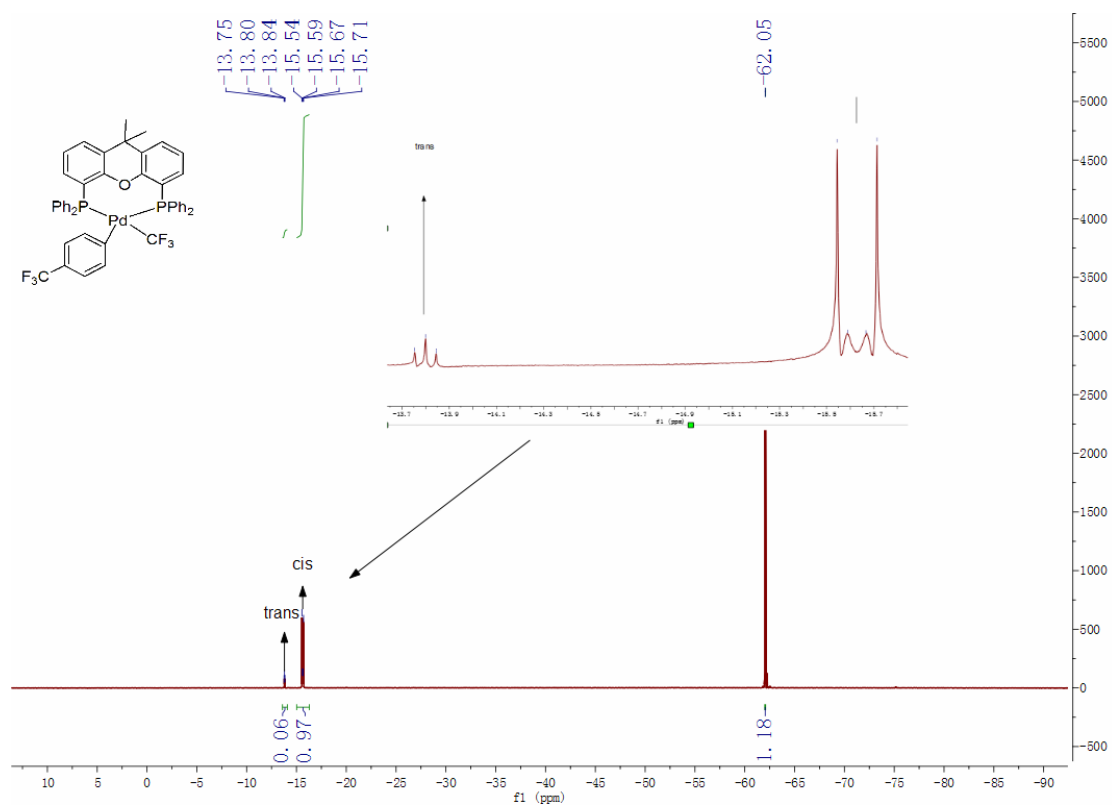

**Figure S16.**  $^{31}\text{P}$  NMR spectrum of (**2c**)

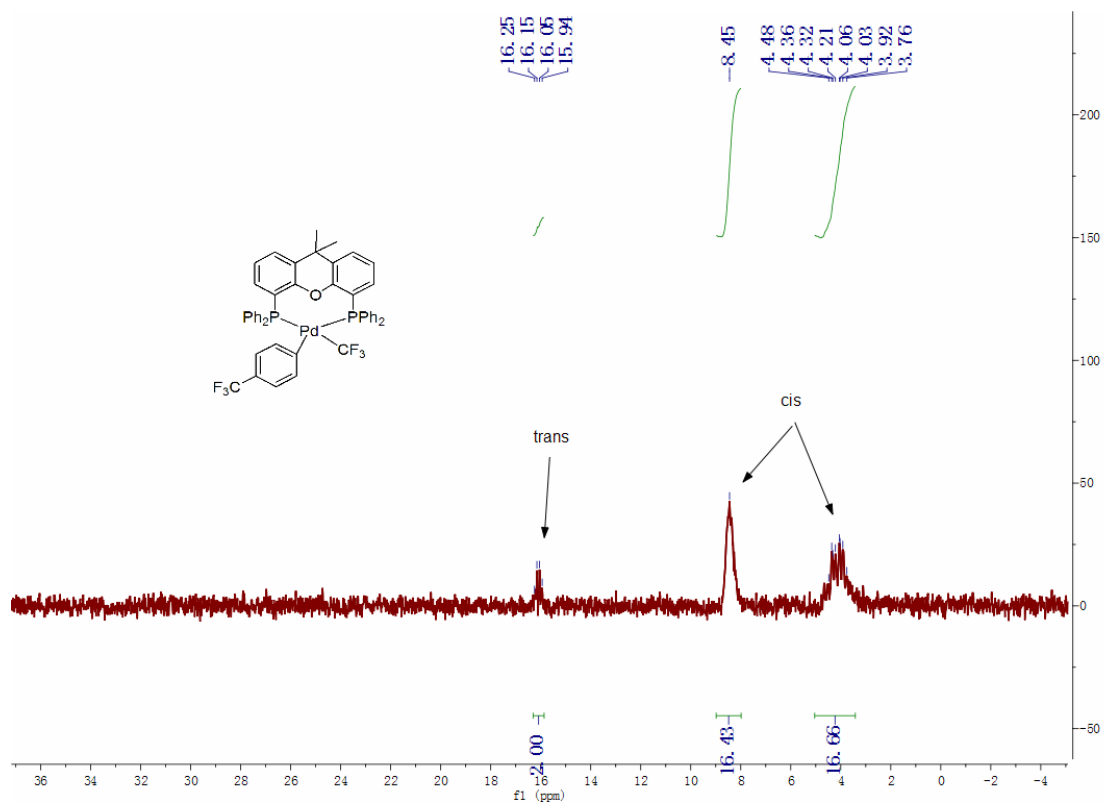

### 3. X-ray crystallographic study of 2c

Crystals of complex **2c** suitable for X-ray crystallographic analyses were grown by dissolving **2c** in a mixed solvent of CH<sub>2</sub>Cl<sub>2</sub>/hexane and then stored in the refrigerator for more than 12 hours. CCDC 1446596 contains the detailed information about the crystallographic study and crystal structure of complex **2c**. The following sections show some key information.

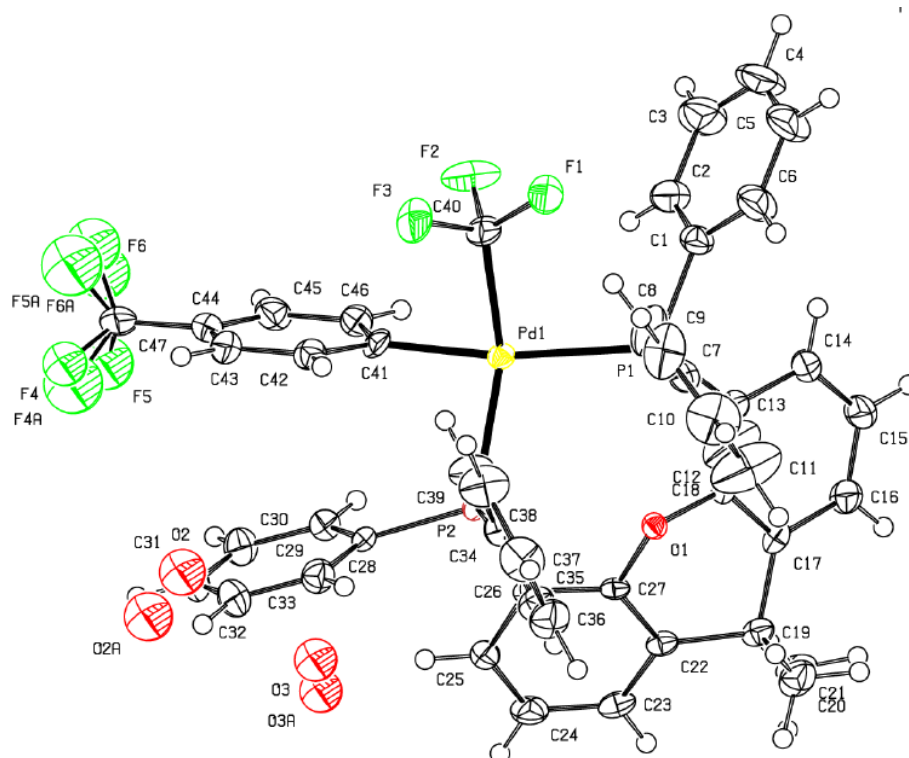

#### Crystal data

|                                |                                                         |
|--------------------------------|---------------------------------------------------------|
| $C_{47}H_{40}F_6O_3P_2Pd$      | ?                                                       |
| $M_r = 935.13$                 | $D_x = 1.485 \text{ Mg m}^{-3}$                         |
| Monoclinic, $P2_1/n$           | Melting point: ? K                                      |
| Hall symbol: $-P 2_1n$         | Mo $K\alpha$ radiation, $\lambda = 0.71073 \text{ \AA}$ |
| $a = 17.5019 (10) \text{ \AA}$ | Cell parameters from 9799 reflections                   |
| $b = 9.8634 (5) \text{ \AA}$   | $\theta = 2.4\text{--}28.1^\circ$                       |

|                                |                                           |
|--------------------------------|-------------------------------------------|
| $c = 25.5915 (15) \text{ \AA}$ | $\mu = 0.59 \text{ mm}^{-1}$              |
| $\beta = 108.725 (2)^\circ$    | $T = 153 \text{ K}$                       |
| $V = 4184.0 (4) \text{ \AA}^3$ | <u>Block, yellow</u>                      |
| $Z = 4$                        | $0.22 \times 0.13 \times 0.12 \text{ mm}$ |
| $F(000) = 1904$                |                                           |

#### Data collection

|                                                                                              |                                                                        |
|----------------------------------------------------------------------------------------------|------------------------------------------------------------------------|
| <u>Bruker APEX-II CCD diffractometer</u>                                                     | <u>7777</u> independent reflections                                    |
| Radiation source: <u>fine-focus sealed tube</u>                                              | <u>6489</u> reflections with $I > 2\sigma(I)$                          |
| <u>graphite</u>                                                                              | $R_{\text{int}} = 0.085$                                               |
| Detector resolution: <u>?</u> pixels $\text{mm}^{-1}$                                        | $\theta_{\text{max}} = 25.5^\circ$ , $\theta_{\text{min}} = 2.2^\circ$ |
| <u><math>\varphi</math> and <math>\omega</math> scans</u>                                    | $h = -21 \quad 21$                                                     |
| Absorption correction: <u>multi-scan</u><br><u>Jacobson, R. (1998) Private communication</u> | $k = -11 \quad 11$                                                     |
| $T_{\text{min}} = 0.882$ , $T_{\text{max}} = 0.933$                                          | $l = -31 \quad 31$                                                     |
| <u>118559</u> measured reflections                                                           |                                                                        |

#### Refinement

|                                   |                                                                                                        |
|-----------------------------------|--------------------------------------------------------------------------------------------------------|
| Refinement on $F^2$               | Secondary atom site location: <u>difference</u><br><u>Fourier map</u>                                  |
| Least-squares matrix: <u>full</u> | Hydrogen site location: <u>inferred from</u><br><u>neighbouring sites</u>                              |
| $R[F^2 > 2\sigma(F^2)] = 0.071$   | <u>H-atom parameters constrained</u>                                                                   |
| $wR(F^2) = 0.180$                 | $w = 1/[\sigma^2(F_o^2) + (0.0602P)^2 + 34.5819P]$<br><u>where <math>P = (F_o^2 + 2F_c^2)/3</math></u> |
| $S = 1.16$                        | $(\Delta/\sigma)_{\text{max}} \leq 0.001$                                                              |
| <u>7777</u> reflections           | $\Delta\rho_{\text{max}} = 2.08 \text{ e \AA}^{-3}$                                                    |
| <u>528</u> parameters             | $\Delta\rho_{\text{min}} = -1.00 \text{ e \AA}^{-3}$                                                   |

|                                                                       |                                    |
|-----------------------------------------------------------------------|------------------------------------|
| <u>0</u> restraints                                                   | Extinction correction: <u>none</u> |
| <u>?</u> constraints                                                  | Extinction coefficient: <u>?</u>   |
| Primary atom site location: <u>structure-invariant direct methods</u> |                                    |

Fractional atomic coordinates and isotropic or equivalent isotropic displacement parameters ( $\text{\AA}^2$ )

|     | <i>x</i>    | <i>y</i>     | <i>z</i>      | $U_{\text{iso}}^*/U_{\text{eq}}$ | Occ. (<1) |
|-----|-------------|--------------|---------------|----------------------------------|-----------|
| Pd1 | 0.50843 (3) | 0.58869 (5)  | 0.256364 (18) | 0.01830 (15)                     |           |
| P1  | 0.44888 (9) | 0.46911 (16) | 0.16765 (6)   | 0.0190 (3)                       |           |
| P2  | 0.52297 (8) | 0.40948 (16) | 0.32331 (6)   | 0.0175 (3)                       |           |
| O1  | 0.4134 (2)  | 0.2588 (4)   | 0.23550 (16)  | 0.0174 (9)                       |           |
| O2  | 0.9023 (8)  | 0.3979 (13)  | 0.4778 (5)    | 0.055 (3)*                       | 0.50      |
| O3  | 0.8396 (7)  | 0.1765 (13)  | 0.4362 (5)    | 0.047 (2)*                       | 0.50      |
| O2A | 0.9310 (8)  | 0.3579 (14)  | 0.5104 (6)    | 0.061 (3)*                       | 0.50      |
| O3A | 0.8133 (7)  | 0.1469 (13)  | 0.4470 (5)    | 0.047 (2)*                       | 0.50      |
| F1  | 0.5544 (3)  | 0.7225 (5)   | 0.16783 (16)  | 0.0402 (10)                      |           |
| F2  | 0.5040 (3)  | 0.8624 (5)   | 0.2118 (2)    | 0.0522 (13)                      |           |
| F3  | 0.6234 (3)  | 0.7878 (5)   | 0.24754 (17)  | 0.0453 (12)                      |           |
| F4  | 0.6826 (7)  | 0.9446 (10)  | 0.4997 (4)    | 0.050 (2)*                       | 0.50      |
| F5  | 0.5607 (7)  | 0.9790 (13)  | 0.4884 (5)    | 0.073 (3)*                       | 0.50      |
| F6  | 0.6180 (8)  | 1.1117 (13)  | 0.4487 (5)    | 0.075 (3)*                       | 0.50      |
| F4A | 0.6452 (10) | 0.9335 (16)  | 0.5060 (6)    | 0.091 (4)*                       | 0.50      |
| F5A | 0.6880 (9)  | 1.0634 (15)  | 0.4605 (6)    | 0.095 (4)*                       | 0.50      |
| F6A | 0.5741 (8)  | 1.0932 (13)  | 0.4571 (5)    | 0.072 (3)*                       | 0.50      |
| C1  | 0.4177 (4)  | 0.5857 (7)   | 0.1091 (3)    | 0.0280 (14)                      |           |
| C2  | 0.3755 (5)  | 0.7001 (8)   | 0.1146 (3)    | 0.0384 (17)                      |           |
| H2  | 0.3664      | 0.7180       | 0.1486        | 0.046*                           |           |
| C3  | 0.3463 (6)  | 0.7891 (10)  | 0.0705 (4)    | 0.056 (2)                        |           |

|     |            |             |            |             |  |
|-----|------------|-------------|------------|-------------|--|
| H3  | 0.3165     | 0.8671      | 0.0741     | 0.067*      |  |
| C4  | 0.3606 (6) | 0.7638 (11) | 0.0214 (4) | 0.063 (3)   |  |
| H4  | 0.3420     | 0.8259      | -0.0083    | 0.075*      |  |
| C5  | 0.4015 (6) | 0.6498 (11) | 0.0154 (3) | 0.055 (2)   |  |
| H5  | 0.4102     | 0.6321      | -0.0187    | 0.066*      |  |
| C6  | 0.4305 (5) | 0.5600 (9)  | 0.0591 (3) | 0.0430 (19) |  |
| H6  | 0.4591     | 0.4811      | 0.0549     | 0.052*      |  |
| C7  | 0.5214 (4) | 0.3533 (7)  | 0.1530 (3) | 0.0247 (14) |  |
| C8  | 0.5929 (4) | 0.4049 (9)  | 0.1497 (3) | 0.0432 (19) |  |
| H8  | 0.6023     | 0.4998      | 0.1534     | 0.052*      |  |
| C9  | 0.6509 (5) | 0.3224 (10) | 0.1410 (4) | 0.051 (2)   |  |
| H9  | 0.6990     | 0.3610      | 0.1378     | 0.061*      |  |
| C10 | 0.6401 (5) | 0.1867 (10) | 0.1369 (4) | 0.056 (2)   |  |
| H10 | 0.6799     | 0.1299      | 0.1304     | 0.068*      |  |
| C11 | 0.5710 (7) | 0.1316 (11) | 0.1424 (6) | 0.080 (4)   |  |
| H11 | 0.5637     | 0.0361      | 0.1412     | 0.096*      |  |
| C12 | 0.5120 (5) | 0.2163 (9)  | 0.1497 (4) | 0.058 (3)   |  |
| H12 | 0.4637     | 0.1777      | 0.1524     | 0.070*      |  |
| C13 | 0.3556 (3) | 0.3674 (6)  | 0.1512 (2) | 0.0197 (13) |  |
| C14 | 0.2914 (4) | 0.3821 (7)  | 0.1025 (3) | 0.0291 (15) |  |
| H14 | 0.2956     | 0.4435      | 0.0749     | 0.035*      |  |
| C15 | 0.2218 (4) | 0.3074 (7)  | 0.0942 (3) | 0.0338 (16) |  |
| H15 | 0.1782     | 0.3186      | 0.0610     | 0.041*      |  |
| C16 | 0.2144 (4) | 0.2164 (7)  | 0.1335 (3) | 0.0304 (15) |  |
| H16 | 0.1656     | 0.1672      | 0.1274     | 0.036*      |  |
| C17 | 0.2786 (4) | 0.1969 (6)  | 0.1822 (3) | 0.0217 (13) |  |
| C18 | 0.3472 (3) | 0.2738 (6)  | 0.1890 (2) | 0.0157 (12) |  |
| C19 | 0.2788 (3) | 0.0931 (6)  | 0.2264 (3) | 0.0231 (13) |  |

|      |            |             |            |             |  |
|------|------------|-------------|------------|-------------|--|
| C20  | 0.3183 (4) | -0.0370 (7) | 0.2145 (3) | 0.0375 (17) |  |
| H20A | 0.3723     | -0.0159     | 0.2129     | 0.056*      |  |
| H20B | 0.2853     | -0.0749     | 0.1790     | 0.056*      |  |
| H20C | 0.3227     | -0.1031     | 0.2438     | 0.056*      |  |
| C21  | 0.1927 (4) | 0.0590 (7)  | 0.2259 (3) | 0.0342 (17) |  |
| H21A | 0.1949     | -0.0133     | 0.2526     | 0.051*      |  |
| H21B | 0.1604     | 0.0286      | 0.1889     | 0.051*      |  |
| H21C | 0.1679     | 0.1399      | 0.2358     | 0.051*      |  |
| C22  | 0.3296 (3) | 0.1502 (6)  | 0.2817 (2) | 0.0190 (12) |  |
| C23  | 0.3164 (4) | 0.1284 (7)  | 0.3317 (3) | 0.0272 (15) |  |
| H23  | 0.2718     | 0.0744      | 0.3326     | 0.033*      |  |
| C24  | 0.3668 (4) | 0.1837 (7)  | 0.3801 (3) | 0.0308 (15) |  |
| H24  | 0.3573     | 0.1656      | 0.4140     | 0.037*      |  |
| C25  | 0.4305 (4) | 0.2645 (6)  | 0.3799 (3) | 0.0242 (14) |  |
| H25  | 0.4643     | 0.3024      | 0.4135     | 0.029*      |  |
| C26  | 0.4464 (3) | 0.2915 (6)  | 0.3308 (2) | 0.0174 (12) |  |
| C27  | 0.3949 (3) | 0.2318 (6)  | 0.2831 (2) | 0.0163 (12) |  |
| C28  | 0.5694 (4) | 0.4591 (6)  | 0.3957 (2) | 0.0188 (12) |  |
| C29  | 0.5274 (4) | 0.5480 (7)  | 0.4188 (3) | 0.0263 (14) |  |
| H29  | 0.4756     | 0.5798      | 0.3973     | 0.032*      |  |
| C30  | 0.5605 (4) | 0.5904 (8)  | 0.4729 (3) | 0.0332 (16) |  |
| H30  | 0.5316     | 0.6514      | 0.4883     | 0.040*      |  |
| C31  | 0.6351 (5) | 0.5444 (8)  | 0.5042 (3) | 0.0401 (19) |  |
| H31  | 0.6582     | 0.5745      | 0.5412     | 0.048*      |  |
| C32  | 0.6765 (5) | 0.4543 (8)  | 0.4819 (3) | 0.0383 (18) |  |
| H32  | 0.7276     | 0.4209      | 0.5039     | 0.046*      |  |
| C33  | 0.6437 (4) | 0.4125 (7)  | 0.4276 (3) | 0.0301 (15) |  |
| H33  | 0.6728     | 0.3513      | 0.4124     | 0.036*      |  |

|     |            |            |            |             |  |
|-----|------------|------------|------------|-------------|--|
| C34 | 0.5994 (3) | 0.3042 (6) | 0.3097 (2) | 0.0203 (13) |  |
| C35 | 0.5995 (4) | 0.1648 (7) | 0.3120 (3) | 0.0305 (15) |  |
| H35 | 0.5569     | 0.1191     | 0.3202     | 0.037*      |  |
| C36 | 0.6607 (4) | 0.0900 (8) | 0.3025 (3) | 0.0391 (17) |  |
| H36 | 0.6600     | -0.0062    | 0.3038     | 0.047*      |  |
| C37 | 0.7236 (5) | 0.1577 (8) | 0.2908 (3) | 0.0411 (19) |  |
| H37 | 0.7665     | 0.1076     | 0.2850     | 0.049*      |  |
| C38 | 0.7232 (5) | 0.2961 (9) | 0.2878 (4) | 0.044 (2)   |  |
| H38 | 0.7654     | 0.3420     | 0.2792     | 0.052*      |  |
| C39 | 0.6613 (4) | 0.3699 (8) | 0.2972 (3) | 0.0349 (17) |  |
| H39 | 0.6615     | 0.4660     | 0.2951     | 0.042*      |  |
| C40 | 0.5470 (4) | 0.7474 (7) | 0.2185 (3) | 0.0286 (15) |  |
| C41 | 0.5483 (4) | 0.7166 (6) | 0.3217 (3) | 0.0245 (14) |  |
| C42 | 0.6277 (4) | 0.7237 (7) | 0.3564 (3) | 0.0265 (14) |  |
| H42 | 0.6676     | 0.6683     | 0.3491     | 0.032*      |  |
| C43 | 0.6499 (4) | 0.8107 (7) | 0.4016 (3) | 0.0348 (17) |  |
| H43 | 0.7043     | 0.8128     | 0.4253     | 0.042*      |  |
| C44 | 0.5930 (5) | 0.8941 (7) | 0.4122 (3) | 0.0343 (17) |  |
| C45 | 0.5140 (5) | 0.8917 (7) | 0.3770 (3) | 0.0333 (16) |  |
| H45 | 0.4748     | 0.9495     | 0.3837     | 0.040*      |  |
| C46 | 0.4925 (4) | 0.8051 (7) | 0.3321 (3) | 0.0275 (14) |  |
| H46 | 0.4385     | 0.8057     | 0.3079     | 0.033*      |  |
| C47 | 0.6171 (6) | 0.9851 (8) | 0.4603 (3) | 0.054 (3)   |  |

Geometric parameters (Å, °)

|         |           |         |           |
|---------|-----------|---------|-----------|
| Pd1—C41 | 2.030 (6) | C17—C19 | 1.524 (9) |
| Pd1—C40 | 2.066 (6) | C19—C22 | 1.518 (9) |

|         |             |          |            |
|---------|-------------|----------|------------|
| Pd1—P2  | 2.4175 (16) | C19—C20  | 1.534 (9)  |
| Pd1—P1  | 2.4723 (16) | C19—C21  | 1.541 (8)  |
| P1—C1   | 1.829 (7)   | C20—H20A | 0.9800     |
| P1—C7   | 1.833 (6)   | C20—H20B | 0.9800     |
| P1—C13  | 1.846 (6)   | C20—H20C | 0.9800     |
| P2—C34  | 1.813 (6)   | C21—H21A | 0.9800     |
| P2—C26  | 1.831 (6)   | C21—H21B | 0.9800     |
| P2—C28  | 1.834 (6)   | C21—H21C | 0.9800     |
| O1—C18  | 1.377 (7)   | C22—C23  | 1.388 (9)  |
| O1—C27  | 1.384 (7)   | C22—C27  | 1.388 (8)  |
| F1—C40  | 1.365 (8)   | C23—C24  | 1.384 (10) |
| F2—C40  | 1.342 (8)   | C23—H23  | 0.9500     |
| F3—C40  | 1.364 (8)   | C24—C25  | 1.372 (9)  |
| F4—C47  | 1.322 (13)  | C24—H24  | 0.9500     |
| F5—C47  | 1.397 (15)  | C25—C26  | 1.397 (8)  |
| F6—C47  | 1.285 (15)  | C25—H25  | 0.9500     |
| F4A—C47 | 1.226 (16)  | C26—C27  | 1.393 (8)  |
| F5A—C47 | 1.460 (17)  | C28—C33  | 1.374 (9)  |
| F6A—C47 | 1.291 (15)  | C28—C29  | 1.393 (9)  |
| C1—C2   | 1.380 (10)  | C29—C30  | 1.381 (9)  |
| C1—C6   | 1.389 (10)  | C29—H29  | 0.9500     |
| C2—C3   | 1.391 (11)  | C30—C31  | 1.371 (11) |
| C2—H2   | 0.9500      | C30—H30  | 0.9500     |
| C3—C4   | 1.379 (14)  | C31—C32  | 1.381 (11) |
| C3—H3   | 0.9500      | C31—H31  | 0.9500     |
| C4—C5   | 1.368 (14)  | C32—C33  | 1.385 (10) |
| C4—H4   | 0.9500      | C32—H32  | 0.9500     |
| C5—C6   | 1.389 (12)  | C33—H33  | 0.9500     |



|             |             |             |            |
|-------------|-------------|-------------|------------|
| C5—H5       | 0.9500      | C34—C35     | 1.377 (9)  |
| C6—H6       | 0.9500      | C34—C39     | 1.385 (9)  |
| C7—C12      | 1.360 (11)  | C35—C36     | 1.385 (10) |
| C7—C8       | 1.380 (9)   | C35—H35     | 0.9500     |
| C8—C9       | 1.373 (11)  | C36—C37     | 1.399 (11) |
| C8—H8       | 0.9500      | C36—H36     | 0.9500     |
| C9—C10      | 1.351 (13)  | C37—C38     | 1.367 (12) |
| C9—H9       | 0.9500      | C37—H37     | 0.9500     |
| C10—C11     | 1.373 (13)  | C38—C39     | 1.388 (10) |
| C10—H10     | 0.9500      | C38—H38     | 0.9500     |
| C11—C12     | 1.387 (12)  | C39—H39     | 0.9500     |
| C11—H11     | 0.9500      | C41—C42     | 1.390 (9)  |
| C12—H12     | 0.9500      | C41—C46     | 1.399 (9)  |
| C13—C18     | 1.378 (8)   | C42—C43     | 1.393 (10) |
| C13—C14     | 1.391 (9)   | C42—H42     | 0.9500     |
| C14—C15     | 1.382 (9)   | C43—C44     | 1.383 (11) |
| C14—H14     | 0.9500      | C43—H43     | 0.9500     |
| C15—C16     | 1.384 (10)  | C44—C45     | 1.387 (10) |
| C15—H15     | 0.9500      | C44—C47     | 1.472 (11) |
| C16—C17     | 1.399 (9)   | C45—C46     | 1.383 (10) |
| C16—H16     | 0.9500      | C45—H45     | 0.9500     |
| C17—C18     | 1.383 (8)   | C46—H46     | 0.9500     |
| C41—Pd1—C40 | 80.7 (3)    | C24—C23—H23 | 119.4      |
| C41—Pd1—P2  | 86.60 (19)  | C22—C23—H23 | 119.4      |
| C40—Pd1—P2  | 155.6 (2)   | C25—C24—C23 | 120.7 (6)  |
| C41—Pd1—P1  | 169.89 (19) | C25—C24—H24 | 119.6      |
| C40—Pd1—P1  | 92.02 (19)  | C23—C24—H24 | 119.6      |
| P2—Pd1—P1   | 102.67 (5)  | C24—C25—C26 | 120.8 (6)  |

|            |             |             |           |
|------------|-------------|-------------|-----------|
| C1—P1—C7   | 105.6 (3)   | C24—C25—H25 | 119.6     |
| C1—P1—C13  | 98.4 (3)    | C26—C25—H25 | 119.6     |
| C7—P1—C13  | 103.5 (3)   | C27—C26—C25 | 116.6 (5) |
| C1—P1—Pd1  | 112.3 (2)   | C27—C26—P2  | 117.8 (4) |
| C7—P1—Pd1  | 111.7 (2)   | C25—C26—P2  | 125.4 (5) |
| C13—P1—Pd1 | 123.4 (2)   | O1—C27—C22  | 120.7 (5) |
| C34—P2—C26 | 105.4 (3)   | O1—C27—C26  | 114.9 (5) |
| C34—P2—C28 | 103.4 (3)   | C22—C27—C26 | 124.3 (5) |
| C26—P2—C28 | 99.6 (3)    | C33—C28—C29 | 119.0 (6) |
| C34—P2—Pd1 | 101.5 (2)   | C33—C28—P2  | 122.6 (5) |
| C26—P2—Pd1 | 128.67 (19) | C29—C28—P2  | 118.3 (5) |
| C28—P2—Pd1 | 115.6 (2)   | C30—C29—C28 | 120.5 (6) |
| C18—O1—C27 | 114.3 (4)   | C30—C29—H29 | 119.7     |
| C2—C1—C6   | 119.5 (7)   | C28—C29—H29 | 119.7     |
| C2—C1—P1   | 117.3 (5)   | C31—C30—C29 | 119.9 (7) |
| C6—C1—P1   | 123.1 (6)   | C31—C30—H30 | 120.0     |
| C1—C2—C3   | 120.2 (8)   | C29—C30—H30 | 120.0     |
| C1—C2—H2   | 119.9       | C30—C31—C32 | 120.0 (7) |
| C3—C2—H2   | 119.9       | C30—C31—H31 | 120.0     |
| C4—C3—C2   | 119.8 (9)   | C32—C31—H31 | 120.0     |
| C4—C3—H3   | 120.1       | C31—C32—C33 | 120.2 (7) |
| C2—C3—H3   | 120.1       | C31—C32—H32 | 119.9     |
| C5—C4—C3   | 120.4 (8)   | C33—C32—H32 | 119.9     |
| C5—C4—H4   | 119.8       | C28—C33—C32 | 120.4 (7) |
| C3—C4—H4   | 119.8       | C28—C33—H33 | 119.8     |
| C4—C5—C6   | 120.2 (8)   | C32—C33—H33 | 119.8     |
| C4—C5—H5   | 119.9       | C35—C34—C39 | 119.1 (6) |
| C6—C5—H5   | 119.9       | C35—C34—P2  | 123.7 (5) |

|             |           |             |           |
|-------------|-----------|-------------|-----------|
| C5—C6—C1    | 120.0 (8) | C39—C34—P2  | 117.2 (5) |
| C5—C6—H6    | 120.0     | C34—C35—C36 | 121.0 (7) |
| C1—C6—H6    | 120.0     | C34—C35—H35 | 119.5     |
| C12—C7—C8   | 117.2 (7) | C36—C35—H35 | 119.5     |
| C12—C7—P1   | 123.6 (5) | C35—C36—C37 | 119.3 (7) |
| C8—C7—P1    | 119.0 (6) | C35—C36—H36 | 120.3     |
| C9—C8—C7    | 121.6 (8) | C37—C36—H36 | 120.3     |
| C9—C8—H8    | 119.2     | C38—C37—C36 | 119.8 (7) |
| C7—C8—H8    | 119.2     | C38—C37—H37 | 120.1     |
| C10—C9—C8   | 120.4 (8) | C36—C37—H37 | 120.1     |
| C10—C9—H9   | 119.8     | C37—C38—C39 | 120.3 (7) |
| C8—C9—H9    | 119.8     | C37—C38—H38 | 119.8     |
| C9—C10—C11  | 119.5 (8) | C39—C38—H38 | 119.8     |
| C9—C10—H10  | 120.3     | C34—C39—C38 | 120.4 (7) |
| C11—C10—H10 | 120.3     | C34—C39—H39 | 119.8     |
| C10—C11—C12 | 119.5 (9) | C38—C39—H39 | 119.8     |
| C10—C11—H11 | 120.2     | F2—C40—F3   | 103.6 (6) |
| C12—C11—H11 | 120.2     | F2—C40—F1   | 104.5 (5) |
| C7—C12—C11  | 121.8 (8) | F3—C40—F1   | 101.3 (5) |
| C7—C12—H12  | 119.1     | F2—C40—Pd1  | 116.4 (4) |
| C11—C12—H12 | 119.1     | F3—C40—Pd1  | 112.1 (4) |
| C18—C13—C14 | 117.5 (5) | F1—C40—Pd1  | 117.0 (4) |
| C18—C13—P1  | 119.3 (4) | C42—C41—C46 | 117.5 (6) |
| C14—C13—P1  | 123.2 (5) | C42—C41—Pd1 | 124.5 (5) |
| C15—C14—C13 | 120.0 (6) | C46—C41—Pd1 | 117.9 (5) |
| C15—C14—H14 | 120.0     | C41—C42—C43 | 121.2 (6) |
| C13—C14—H14 | 120.0     | C41—C42—H42 | 119.4     |
| C14—C15—C16 | 121.2 (6) | C43—C42—H42 | 119.4     |

|               |           |             |            |
|---------------|-----------|-------------|------------|
| C14—C15—H15   | 119.4     | C44—C43—C42 | 120.1 (7)  |
| C16—C15—H15   | 119.4     | C44—C43—H43 | 119.9      |
| C15—C16—C17   | 120.1 (6) | C42—C43—H43 | 119.9      |
| C15—C16—H16   | 120.0     | C43—C44—C45 | 119.6 (6)  |
| C17—C16—H16   | 120.0     | C43—C44—C47 | 119.7 (7)  |
| C18—C17—C16   | 116.9 (6) | C45—C44—C47 | 120.7 (7)  |
| C18—C17—C19   | 118.7 (5) | C46—C45—C44 | 119.9 (7)  |
| C16—C17—C19   | 124.3 (6) | C46—C45—H45 | 120.0      |
| O1—C18—C13    | 115.4 (5) | C44—C45—H45 | 120.0      |
| O1—C18—C17    | 120.3 (5) | C45—C46—C41 | 121.5 (6)  |
| C13—C18—C17   | 124.3 (5) | C45—C46—H46 | 119.2      |
| C22—C19—C17   | 107.6 (5) | C41—C46—H46 | 119.2      |
| C22—C19—C20   | 109.2 (5) | F4A—C47—F6  | 126.3 (12) |
| C17—C19—C20   | 108.0 (5) | F4A—C47—F6A | 116.8 (12) |
| C22—C19—C21   | 111.6 (5) | F6—C47—F6A  | 39.9 (7)   |
| C17—C19—C21   | 111.8 (5) | F4A—C47—F4  | 33.0 (8)   |
| C20—C19—C21   | 108.6 (6) | F6—C47—F4   | 113.4 (10) |
| C19—C20—H20A  | 109.5     | F6A—C47—F4  | 129.9 (10) |
| C19—C20—H20B  | 109.5     | F4A—C47—F5  | 67.9 (10)  |
| H20A—C20—H20B | 109.5     | F6—C47—F5   | 102.9 (11) |
| C19—C20—H20C  | 109.5     | F6A—C47—F5  | 64.9 (9)   |
| H20A—C20—H20C | 109.5     | F4—C47—F5   | 100.1 (9)  |
| H20B—C20—H20C | 109.5     | F4A—C47—F5A | 97.7 (12)  |
| C19—C21—H21A  | 109.5     | F6—C47—F5A  | 54.1 (8)   |
| C19—C21—H21B  | 109.5     | F6A—C47—F5A | 92.3 (9)   |
| H21A—C21—H21B | 109.5     | F4—C47—F5A  | 68.2 (9)   |
| C19—C21—H21C  | 109.5     | F5—C47—F5A  | 139.4 (10) |
| H21A—C21—H21C | 109.5     | F4A—C47—C44 | 117.8 (10) |

|               |           |             |           |
|---------------|-----------|-------------|-----------|
| H21B—C21—H21C | 109.5     | F6—C47—C44  | 115.0 (9) |
| C23—C22—C27   | 116.4 (6) | F6A—C47—C44 | 116.5 (9) |
| C23—C22—C19   | 125.4 (5) | F4—C47—C44  | 113.5 (8) |
| C27—C22—C19   | 118.1 (5) | F5—C47—C44  | 110.3 (9) |
| C24—C23—C22   | 121.2 (6) | F5A—C47—C44 | 109.9 (9) |

#### 4. Thermal decomposition study

A typical procedure for thermal decomposition of **2c**: In an oven-dried Schlenk tube equipped with a magnetic stir bar were added **2c** (85 mg, 0.1 mmol) (and equal molecular of Xantphos for entries 2,4 in Table 1). The tube was then sealed, evacuated and back-filled with nitrogen three times. Under nitrogen, benzene (1 mL) was added by syringe. The contents in the tube were then vigorously stirred at 80 °C for 2 hours. The reaction mixture was cooled to room temperature. After filtration, the filtrate was subjected to  $^{19}\text{F}$  NMR spectroscopy using 4,4-difluorobiphenyl as the internal standard to determine the NMR yield. Alternatively, the solvents in the filtrate were removed under reduced pressure to get crude product residuals. Ar-CF<sub>3</sub> (**A**) and Ar-Ar (**B**) in the residuals were further separated by column chromatography on silical gel using petroleum ether as the eluent. Figures S17-S20 shows the NMR spectra of isolated Ar-CF<sub>3</sub> (**A**) and Ar-Ar (**B**).

**Figure S17.**  $^1\text{H}$  NMR (400 MHz,  $\text{CDCl}_3$ ) of Ar-CF<sub>3</sub> (**A**)

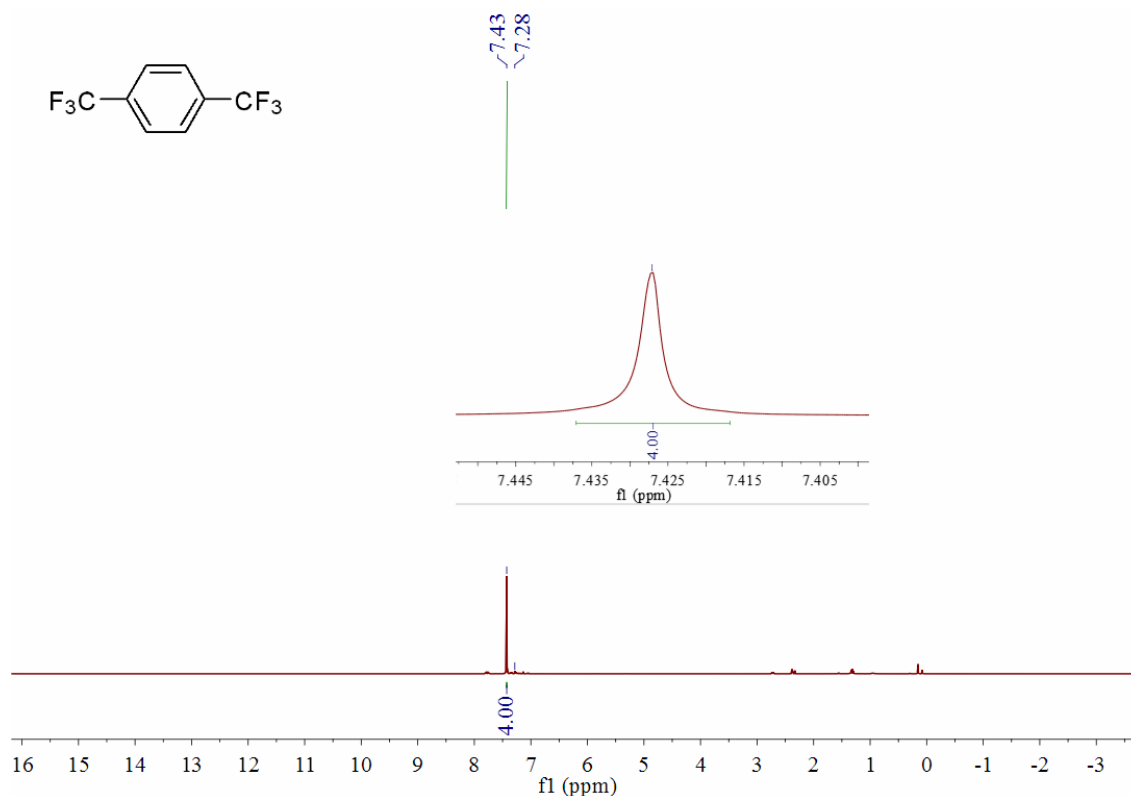

**Figure S18.**  $^{19}\text{F}$  NMR (376 MHz,  $\text{CDCl}_3$ ) of Ar- $\text{CF}_3$  (**A**)

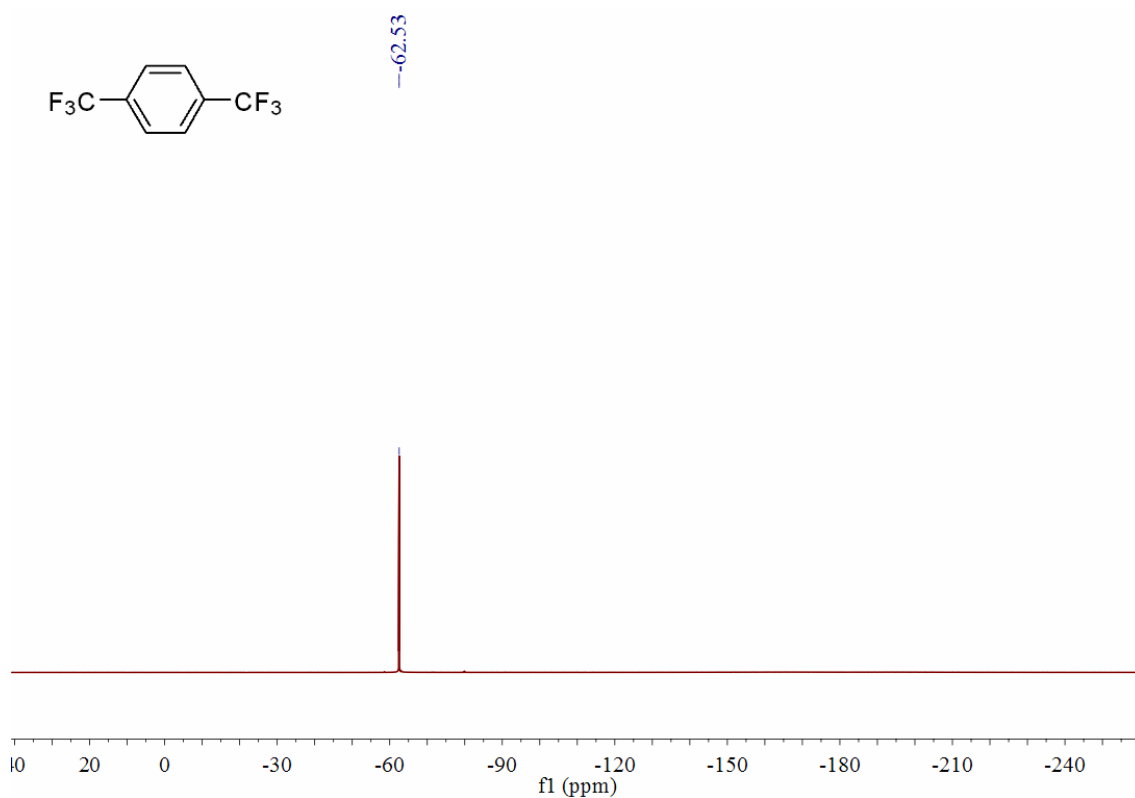

**Figure S19.**  $^1\text{H}$  NMR (400 MHz,  $\text{CDCl}_3$ ) of Ar-Ar (**B**)

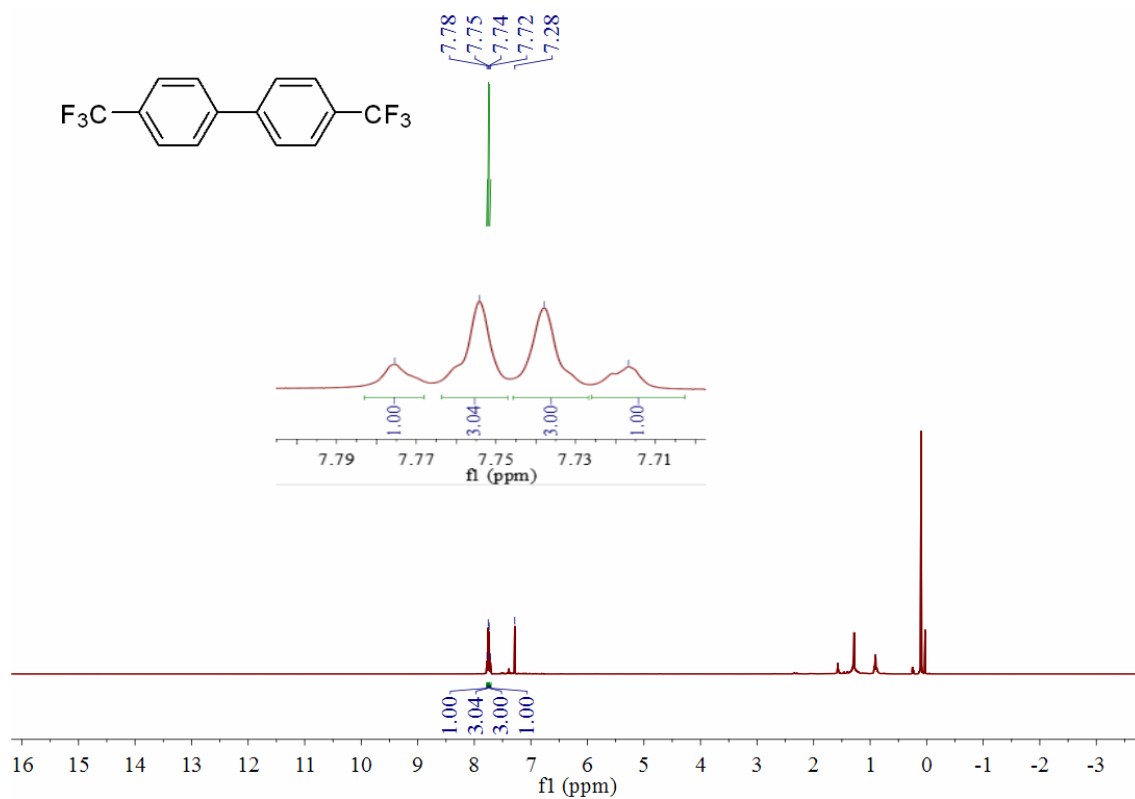

**Figure S20.**  $^{19}\text{F}$  NMR (376 MHz,  $\text{CDCl}_3$ ) of Ar-Ar (**B**)

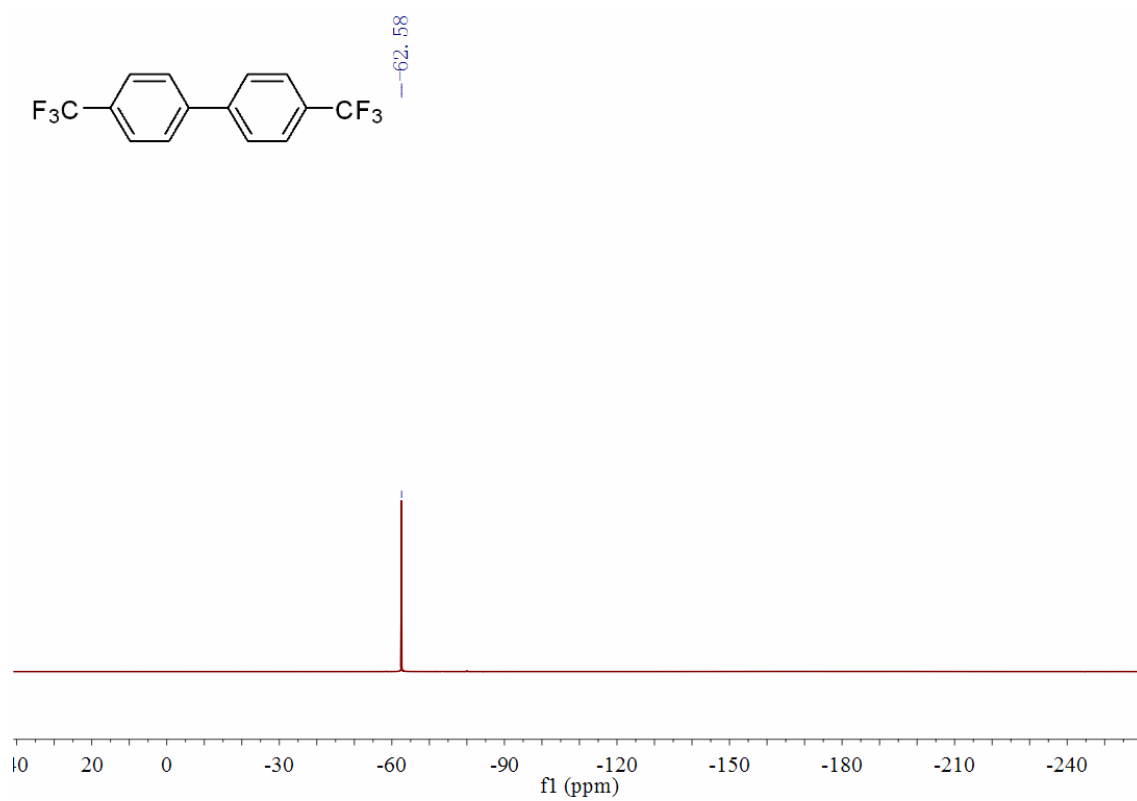



## 5. DFT computational study

### 5.1 Computational methods and model reactions

All calculations were performed with Gaussian 09.<sup>1</sup> B3LYP method<sup>2</sup> was used for geometry optimization calculations with a combined basis set where Pd and P were described by LANL2DZ basis set and effective core potential implemented;<sup>3</sup> the other atoms were described by standard Pople all-electron basis set 6-31G(d). Frequency analyses were conducted at the same level of theory for geometry optimization, aiming to verify the stationary points to be real minima or saddle points, and to get thermodynamic energy correction items. For each saddle point, the intrinsic reaction coordinate (IRC) analysis<sup>4</sup> was carried out to confirm that it connected the correct reactant and product on the potential energy surface. Single-point energy calculations were performed by using B97D functional<sup>5</sup> on the B3LYP-optimized gas-phase stationary points with a larger basis set, *i.e.*, SDD<sup>6</sup> for Pd and 6-311+G(d, p) for the other elements. Solvation effects were taken into account by using self-consistent reaction field (SCRF) method<sup>7</sup> with SMD solvation model<sup>8</sup> in toluene. For each stationary point, its energy was calculated by the solution-phase single-point energy corrected by Gibbs free energy correction item throughout the study. Noteworthy, the B97D/SDD-6-311+g(d,p)//B3LYP/LANL2DZ-6-31g(d) methodology combination used in this study has been demonstrated to be a reliable method for treating Pd fluoro-containing systems by our previous systematic benchmark study.<sup>9</sup> The model reactions studied are shown in Scheme 1 in the main text.

#### References:

- 1 M. J. Frisch *et al.* *Gaussian 09*, revision B.01; Gaussian, Inc.: Wallingford, CT, 2010.
- 2 (a) A. D. Becke, *J. Chem. Phys.*, 1993, **98**, 5648; (b) C. Lee, W. Yang and R. G. Parr, *Phys. Rev. B*, 1988, **37**, 785.
- 3 W. R. Wadt and P. J. Hay, *J. Chem. Phys.*, 1985, **82**, 299.
- 4 C. Gonzalez and H. B. Schlegel, *J. Phys. Chem.*, 1990, **94**, 5523.
- 5 S. Grimme, *J. Comput. Chem.*, 2006, **27**, 1787.
- 6 M. Dolg, U. Wedig, H. Stoll and H. Preuss, *J. Chem. Phys.*, 1987, **86**, 866.
- 7 M. Cossi, N. Rega, G. Scalmani and V. Barone, *J. Comput. Chem.*, 2003, **24**, 669.
- 8 A. V. Marenich, C. J. Cramer and D. G. Truhlar, *J. Phys. Chem. B*, 2009, **113**, 6378.
- 9 S.-L. Zhang, L. Huang and L.-J. Sun, *Dalton Trans.*, 2015, **44**, 4613.

## 5.2 Additional computational results

**Scheme S1.** Computational results for **2a** and **2b** with bpy and BINAP ligands

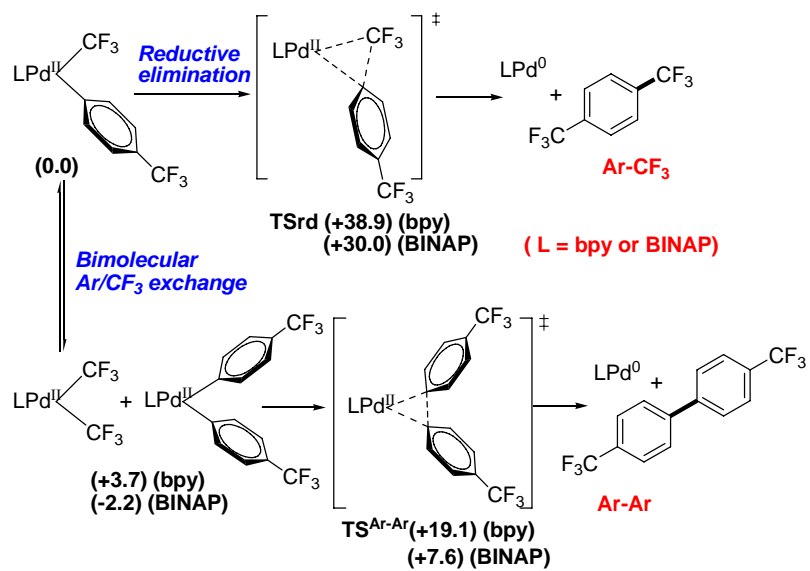

### 5.3 Cartesian coordinates for the optimized stationary points

(Xantphos)Pd(Ar)(CF<sub>3</sub>) (2c):

SCF Done: E(RB3LYP) = -2626.65333952 A.U.

| Center<br>Number | Atomic<br>Number | Atomic<br>Type | Coordinates (Angstroms) |           |           |
|------------------|------------------|----------------|-------------------------|-----------|-----------|
|                  |                  |                | X                       | Y         | Z         |
| 1                | 6                | 0              | -3.364993               | 0.643820  | -1.651809 |
| 2                | 6                | 0              | -2.508375               | 1.052566  | -0.621127 |
| 3                | 6                | 0              | -3.085825               | 1.598833  | 0.537380  |
| 4                | 6                | 0              | -4.472269               | 1.694869  | 0.681358  |
| 5                | 6                | 0              | -5.310552               | 1.251742  | -0.344258 |
| 6                | 6                | 0              | -4.750645               | 0.731809  | -1.514876 |
| 7                | 46               | 0              | -0.483107               | 0.910728  | -0.641582 |
| 8                | 6                | 0              | -0.520030               | 2.491810  | -1.910205 |
| 9                | 9                | 0              | -1.508142               | 2.552991  | -2.835531 |
| 10               | 15               | 0              | 2.037204                | 1.572037  | 0.136406  |
| 11               | 6                | 0              | 3.499767                | 0.706218  | -0.677895 |
| 12               | 6                | 0              | 3.378338                | -0.678796 | -0.870964 |
| 13               | 6                | 0              | 4.376968                | -1.463057 | -1.448640 |
| 14               | 6                | 0              | 5.538403                | -0.793829 | -1.864350 |
| 15               | 6                | 0              | 5.685463                | 0.581478  | -1.703729 |
| 16               | 6                | 0              | 4.669303                | 1.332613  | -1.104931 |
| 17               | 6                | 0              | 4.224815                | -2.981311 | -1.593024 |
| 18               | 6                | 0              | 2.834532                | -3.428350 | -1.119764 |
| 19               | 6                | 0              | 1.899210                | -2.522219 | -0.602703 |
| 20               | 8                | 0              | 2.194963                | -1.202480 | -0.420772 |
| 21               | 6                | 0              | 0.597861                | -2.897559 | -0.233248 |
| 22               | 6                | 0              | 0.250319                | -4.248324 | -0.327422 |
| 23               | 6                | 0              | 1.172439                | -5.185445 | -0.792928 |
| 24               | 6                | 0              | 2.440058                | -4.770081 | -1.195313 |
| 25               | 6                | 0              | 4.406291                | -3.376856 | -3.081750 |
| 26               | 6                | 0              | 5.310401                | -3.683405 | -0.735316 |
| 27               | 15               | 0              | -0.670854               | -1.586872 | 0.284713  |
| 28               | 6                | 0              | -0.864863               | -1.857996 | 2.139746  |
| 29               | 6                | 0              | -1.822382               | -1.090506 | 2.821852  |
| 30               | 6                | 0              | -2.000256               | -1.245553 | 4.197352  |
| 31               | 6                | 0              | -1.210955               | -2.151347 | 4.910406  |
| 32               | 6                | 0              | -0.247002               | -2.903804 | 4.238976  |
| 33               | 6                | 0              | -0.077184               | -2.763321 | 2.859255  |
| 34               | 6                | 0              | 2.629784                | 3.369010  | 0.195172  |
| 35               | 6                | 0              | 2.582754                | 4.148493  | -0.970634 |
| 36               | 6                | 0              | 3.023481                | 5.472446  | -0.951730 |
| 37               | 6                | 0              | 3.501326                | 6.041051  | 0.230284  |
| 38               | 6                | 0              | 3.540506                | 5.274678  | 1.394977  |
| 39               | 6                | 0              | 3.112074                | 3.945203  | 1.378288  |
| 40               | 6                | 0              | 2.233215                | 1.049104  | 1.937637  |
| 41               | 6                | 0              | 1.133533                | 1.206818  | 2.790448  |
| 42               | 6                | 0              | 1.233190                | 0.876382  | 4.143046  |
| 43               | 6                | 0              | 2.431351                | 0.374680  | 4.653881  |
| 44               | 6                | 0              | 3.530041                | 0.209230  | 3.808320  |
| 45               | 6                | 0              | 3.433773                | 0.548610  | 2.457157  |
| 46               | 6                | 0              | -2.209236               | -2.409397 | -0.446791 |
| 47               | 6                | 0              | -3.265506               | -2.898445 | 0.325972  |
| 48               | 6                | 0              | -4.374912               | -3.486650 | -0.290323 |
| 49               | 6                | 0              | -4.431589               | -3.600162 | -1.678576 |
| 50               | 6                | 0              | -3.374905               | -3.116657 | -2.455022 |
| 51               | 6                | 0              | -2.274768               | -2.518366 | -1.843529 |
| 52               | 9                | 0              | 0.644214                | 2.399161  | -2.668691 |
| 53               | 9                | 0              | -0.479871               | 3.719266  | -1.326010 |
| 54               | 1                | 0              | 0.896963                | -6.233865 | -0.857947 |
| 55               | 6                | 0              | -6.797267               | 1.400349  | -0.216584 |
| 56               | 1                | 0              | 3.139303                | -5.507599 | -1.578818 |
| 57               | 1                | 0              | -2.957272               | 0.248362  | -2.575580 |
| 58               | 1                | 0              | -5.398490               | 0.390877  | -2.316906 |
| 59               | 1                | 0              | -4.899537               | 2.115710  | 1.586941  |
| 60               | 1                | 0              | -2.454713               | 1.965657  | 1.343775  |
| 61               | 1                | 0              | -0.749884               | -4.564014 | -0.050087 |

|    |   |   |           |           |           |
|----|---|---|-----------|-----------|-----------|
| 62 | 1 | 0 | 4.787854  | 2.402594  | -0.971969 |
| 63 | 1 | 0 | 6.595962  | 1.071208  | -2.036531 |
| 64 | 1 | 0 | 6.345225  | -1.361870 | -2.318941 |
| 65 | 1 | 0 | -3.233108 | -2.825128 | 1.407734  |
| 66 | 1 | 0 | -5.192476 | -3.858102 | 0.321725  |
| 67 | 1 | 0 | -5.293819 | -4.059021 | -2.154645 |
| 68 | 1 | 0 | -3.410899 | -3.197476 | -3.538225 |
| 69 | 1 | 0 | -1.463636 | -2.134031 | -2.456953 |
| 70 | 1 | 0 | -2.437403 | -0.378247 | 2.278426  |
| 71 | 1 | 0 | -2.755560 | -0.656037 | 4.710548  |
| 72 | 1 | 0 | -1.347454 | -2.269093 | 5.982101  |
| 73 | 1 | 0 | 0.373411  | -3.608965 | 4.785881  |
| 74 | 1 | 0 | 0.669938  | -3.362058 | 2.348560  |
| 75 | 1 | 0 | 0.194844  | 1.585353  | 2.394408  |
| 76 | 1 | 0 | 0.369687  | 0.995100  | 4.790728  |
| 77 | 1 | 0 | 2.507715  | 0.111081  | 5.705397  |
| 78 | 1 | 0 | 4.466397  | -0.180071 | 4.199959  |
| 79 | 1 | 0 | 4.296905  | 0.427795  | 1.809656  |
| 80 | 1 | 0 | 3.155819  | 3.363602  | 2.292132  |
| 81 | 1 | 0 | 3.907474  | 5.707009  | 2.322286  |
| 82 | 1 | 0 | 3.835456  | 7.075130  | 0.244156  |
| 83 | 1 | 0 | 2.979773  | 6.062206  | -1.863445 |
| 84 | 1 | 0 | 2.188808  | 3.731349  | -1.888381 |
| 85 | 1 | 0 | 5.394127  | -3.079265 | -3.448250 |
| 86 | 1 | 0 | 4.318388  | -4.460127 | -3.214685 |
| 87 | 1 | 0 | 3.650321  | -2.892923 | -3.708220 |
| 88 | 1 | 0 | 6.313988  | -3.384974 | -1.057035 |
| 89 | 1 | 0 | 5.200434  | -3.423436 | 0.322522  |
| 90 | 1 | 0 | 5.239009  | -4.772621 | -0.828158 |
| 91 | 9 | 0 | -7.467992 | 0.459380  | -0.923137 |
| 92 | 9 | 0 | -7.209385 | 1.302400  | 1.071220  |
| 93 | 9 | 0 | -7.234343 | 2.602637  | -0.667227 |

TSrd:

SCF Done: E(RB3LYP) = -2626.62129500 A.U.

| Center<br>Number | Atomic<br>Number | Atomic<br>Type | Coordinates (Angstroms) |           |           |
|------------------|------------------|----------------|-------------------------|-----------|-----------|
|                  |                  |                | X                       | Y         | Z         |
| 1                | 6                | 0              | 3.466123                | 1.328535  | 0.921168  |
| 2                | 6                | 0              | 2.498186                | 1.591683  | -0.071117 |
| 3                | 6                | 0              | 2.930822                | 1.712717  | -1.409349 |
| 4                | 6                | 0              | 4.263245                | 1.494431  | -1.750376 |
| 5                | 6                | 0              | 5.204735                | 1.200536  | -0.757961 |
| 6                | 6                | 0              | 4.797638                | 1.122492  | 0.579838  |
| 7                | 46               | 0              | 0.554477                | 0.933597  | 0.097316  |
| 8                | 15               | 0              | -2.059013               | 1.384102  | -0.055770 |
| 9                | 6                | 0              | -2.928610               | 1.277775  | 1.615327  |
| 10               | 6                | 0              | -4.161094               | 0.640117  | 1.795082  |
| 11               | 6                | 0              | -4.753044               | 0.592780  | 3.060163  |
| 12               | 6                | 0              | -4.126861               | 1.194055  | 4.152326  |
| 13               | 6                | 0              | -2.899076               | 1.837296  | 3.977189  |
| 14               | 6                | 0              | -2.297296               | 1.871238  | 2.718949  |
| 15               | 6                | 0              | 6.626585                | 0.939096  | -1.148893 |
| 16               | 9                | 0              | 7.069278                | 1.814771  | -2.080973 |
| 17               | 15               | 0              | 0.706487                | -1.583069 | 0.487159  |
| 18               | 6                | 0              | -0.032579               | -2.799181 | -0.753898 |
| 19               | 6                | 0              | -1.361073               | -2.621885 | -1.158512 |
| 20               | 6                | 0              | -2.005809               | -3.468226 | -2.068229 |
| 21               | 6                | 0              | -1.249429               | -4.504700 | -2.626459 |
| 22               | 6                | 0              | 0.082885                | -4.696200 | -2.260874 |
| 23               | 6                | 0              | 0.683519                | -3.859519 | -1.319460 |
| 24               | 8                | 0              | -2.040132               | -1.559470 | -0.597805 |
| 25               | 6                | 0              | -3.018031               | -0.967243 | -1.368023 |
| 26               | 6                | 0              | -3.766547               | -1.741212 | -2.266233 |
| 27               | 6                | 0              | -3.503467               | -3.250900 | -2.314168 |
| 28               | 6                | 0              | -4.750261               | -1.086965 | -3.013886 |
| 29               | 6                | 0              | -4.984512               | 0.278616  | -2.852164 |

|    |   |   |           |           |           |
|----|---|---|-----------|-----------|-----------|
| 30 | 6 | 0 | -4.224117 | 1.019577  | -1.948786 |
| 31 | 6 | 0 | -3.210712 | 0.409707  | -1.199012 |
| 32 | 6 | 0 | -3.966626 | -3.876033 | -3.641376 |
| 33 | 6 | 0 | -4.287888 | -3.920874 | -1.148388 |
| 34 | 6 | 0 | 2.420330  | -2.329430 | 0.734296  |
| 35 | 6 | 0 | 2.715258  | -3.231956 | 1.764682  |
| 36 | 6 | 0 | 4.001476  | -3.761318 | 1.890696  |
| 37 | 6 | 0 | 5.002892  | -3.396863 | 0.988741  |
| 38 | 6 | 0 | 4.717248  | -2.495333 | -0.038497 |
| 39 | 6 | 0 | 3.433311  | -1.960252 | -0.160642 |
| 40 | 6 | 0 | -0.177461 | -2.061979 | 2.083025  |
| 41 | 6 | 0 | -0.183995 | -1.134366 | 3.131718  |
| 42 | 6 | 0 | -0.795083 | -1.444786 | 4.347662  |
| 43 | 6 | 0 | -1.414327 | -2.683263 | 4.523621  |
| 44 | 6 | 0 | -1.418071 | -3.610439 | 3.479695  |
| 45 | 6 | 0 | -0.800482 | -3.303374 | 2.265272  |
| 46 | 6 | 0 | -2.473036 | 3.142866  | -0.613252 |
| 47 | 6 | 0 | -3.359010 | 3.977030  | 0.077952  |
| 48 | 6 | 0 | -3.630328 | 5.264409  | -0.394467 |
| 49 | 6 | 0 | -3.028806 | 5.724836  | -1.565903 |
| 50 | 6 | 0 | -2.148245 | 4.894351  | -2.263413 |
| 51 | 6 | 0 | -1.867355 | 3.614696  | -1.786108 |
| 52 | 9 | 0 | 7.473887  | 1.000761  | -0.099110 |
| 53 | 9 | 0 | 6.784365  | -0.299690 | -1.701623 |
| 54 | 1 | 0 | -5.761084 | 0.767204  | -3.433726 |
| 55 | 1 | 0 | -5.348824 | -1.645046 | -3.725922 |
| 56 | 1 | 0 | -4.404862 | 2.082730  | -1.838512 |
| 57 | 1 | 0 | 1.715705  | -4.024677 | -1.031665 |
| 58 | 1 | 0 | 0.653042  | -5.509015 | -2.701591 |
| 59 | 1 | 0 | -1.701747 | -5.177540 | -3.346919 |
| 60 | 1 | 0 | -3.839522 | 3.628431  | 0.986185  |
| 61 | 1 | 0 | -4.316136 | 5.904163  | 0.154983  |
| 62 | 1 | 0 | -3.241077 | 6.725683  | -1.932357 |
| 63 | 1 | 0 | -1.670075 | 5.246481  | -3.173565 |
| 64 | 1 | 0 | -1.166130 | 2.983740  | -2.324716 |
| 65 | 1 | 0 | -1.339772 | 2.365983  | 2.589661  |
| 66 | 1 | 0 | -2.405517 | 2.311597  | 4.821674  |
| 67 | 1 | 0 | -4.592029 | 1.162462  | 5.134076  |
| 68 | 1 | 0 | -5.708527 | 0.090334  | 3.187289  |
| 69 | 1 | 0 | -4.664965 | 0.181386  | 0.950090  |
| 70 | 1 | 0 | 0.278756  | -0.161386 | 2.988512  |
| 71 | 1 | 0 | -0.798762 | -0.712759 | 5.150293  |
| 72 | 1 | 0 | -1.896210 | -2.923100 | 5.467756  |
| 73 | 1 | 0 | -1.900509 | -4.575928 | 3.609195  |
| 74 | 1 | 0 | -0.805464 | -4.032913 | 1.460906  |
| 75 | 1 | 0 | 1.944963  | -3.524339 | 2.470538  |
| 76 | 1 | 0 | 4.218525  | -4.458898 | 2.695663  |
| 77 | 1 | 0 | 6.004452  | -3.806488 | 1.090665  |
| 78 | 1 | 0 | 5.495338  | -2.179520 | -0.725973 |
| 79 | 1 | 0 | 3.224371  | -1.240838 | -0.946999 |
| 80 | 1 | 0 | -3.788786 | -4.955590 | -3.643409 |
| 81 | 1 | 0 | -5.043239 | -3.739425 | -3.780929 |
| 82 | 1 | 0 | -3.447691 | -3.437992 | -4.500570 |
| 83 | 1 | 0 | -4.100079 | -5.000799 | -1.135205 |
| 84 | 1 | 0 | -3.986066 | -3.509527 | -0.180178 |
| 85 | 1 | 0 | -5.364710 | -3.755522 | -1.269856 |
| 86 | 1 | 0 | 2.222366  | 1.995879  | -2.181285 |
| 87 | 1 | 0 | 4.578054  | 1.579907  | -2.786614 |
| 88 | 1 | 0 | 5.526612  | 0.902342  | 1.352742  |
| 89 | 1 | 0 | 3.172071  | 1.286984  | 1.965522  |
| 90 | 6 | 0 | 1.347836  | 3.126916  | 0.355223  |
| 91 | 9 | 0 | 0.353261  | 3.363708  | 1.288910  |
| 92 | 9 | 0 | 2.374807  | 3.874115  | 0.835918  |
| 93 | 9 | 0 | 0.960781  | 3.732342  | -0.794206 |

-----  
**TSrd-prod:**

SCF Done: E(RB3LYP) = -2626.70346003 A.U.

-----

| Center<br>Number | Atomic<br>Number | Atomic<br>Type | Coordinates (Angstroms) |           |           |
|------------------|------------------|----------------|-------------------------|-----------|-----------|
|                  |                  |                | X                       | Y         | Z         |
| 1                | 6                | 0              | 3.610203                | 1.361588  | -1.155943 |
| 2                | 6                | 0              | 2.807106                | 0.424865  | -1.878489 |
| 3                | 6                | 0              | 2.736164                | -0.935051 | -1.427975 |
| 4                | 6                | 0              | 3.411012                | -1.282733 | -0.224190 |
| 5                | 6                | 0              | 4.116289                | -0.335026 | 0.493346  |
| 6                | 6                | 0              | 4.233544                | 0.998258  | 0.014886  |
| 7                | 46               | 0              | 0.814753                | 0.002690  | -0.830147 |
| 8                | 15               | 0              | -0.346740               | 2.056991  | 0.079225  |
| 9                | 6                | 0              | -0.205639               | 1.993358  | 1.960078  |
| 10               | 6                | 0              | 1.009552                | 1.552252  | 2.500478  |
| 11               | 6                | 0              | 1.194638                | 1.504949  | 3.882327  |
| 12               | 6                | 0              | 0.160813                | 1.888449  | 4.739588  |
| 13               | 6                | 0              | -1.055056               | 2.321360  | 4.207894  |
| 14               | 6                | 0              | -1.237817               | 2.378394  | 2.823324  |
| 15               | 6                | 0              | 2.534154                | 0.698390  | -3.331693 |
| 16               | 9                | 0              | 2.225936                | 1.996060  | -3.572063 |
| 17               | 6                | 0              | -2.188099               | 2.384191  | -0.195064 |
| 18               | 6                | 0              | -3.097935               | 1.322044  | -0.100180 |
| 19               | 6                | 0              | -4.469052               | 1.464095  | -0.350764 |
| 20               | 6                | 0              | -4.927453               | 2.729840  | -0.730885 |
| 21               | 6                | 0              | -4.049246               | 3.808346  | -0.831633 |
| 22               | 6                | 0              | -2.692309               | 3.638664  | -0.557360 |
| 23               | 8                | 0              | -2.590582               | 0.091720  | 0.267315  |
| 24               | 6                | 0              | -3.204472               | -1.020251 | -0.271567 |
| 25               | 6                | 0              | -4.580530               | -0.998734 | -0.536385 |
| 26               | 6                | 0              | -5.371914               | 0.246550  | -0.120451 |
| 27               | 6                | 0              | -5.146568               | -2.146783 | -1.100376 |
| 28               | 6                | 0              | -4.369130               | -3.274122 | -1.365600 |
| 29               | 6                | 0              | -3.005762               | -3.271641 | -1.072120 |
| 30               | 6                | 0              | -2.395954               | -2.136564 | -0.524945 |
| 31               | 15               | 0              | -0.545037               | -2.029541 | -0.173090 |
| 32               | 6                | 0              | -0.441338               | -2.516426 | 1.645328  |
| 33               | 6                | 0              | 0.697763                | -2.121909 | 2.358551  |
| 34               | 6                | 0              | 0.853969                | -2.479881 | 3.698240  |
| 35               | 6                | 0              | -0.135228               | -3.225092 | 4.342272  |
| 36               | 6                | 0              | -1.280268               | -3.610273 | 3.641140  |
| 37               | 6                | 0              | -1.433279               | -3.260677 | 2.297326  |
| 38               | 6                | 0              | -6.704538               | 0.364047  | -0.879834 |
| 39               | 6                | 0              | -5.675953               | 0.144318  | 1.402733  |
| 40               | 6                | 0              | 0.079945                | -3.576056 | -1.060153 |
| 41               | 6                | 0              | 0.311269                | -3.480386 | -2.441901 |
| 42               | 6                | 0              | 0.797321                | -4.575214 | -3.157204 |
| 43               | 6                | 0              | 1.073907                | -5.776192 | -2.497991 |
| 44               | 6                | 0              | 0.856850                | -5.875289 | -1.123396 |
| 45               | 6                | 0              | 0.358328                | -4.782599 | -0.407090 |
| 46               | 6                | 0              | 0.379938                | 3.761488  | -0.297301 |
| 47               | 6                | 0              | 0.550146                | 4.750378  | 0.680517  |
| 48               | 6                | 0              | 1.099083                | 5.989928  | 0.342335  |
| 49               | 6                | 0              | 1.475501                | 6.256327  | -0.975376 |
| 50               | 6                | 0              | 1.305962                | 5.275421  | -1.955064 |
| 51               | 6                | 0              | 0.766342                | 4.033195  | -1.616403 |
| 52               | 9                | 0              | 1.521944                | -0.055195 | -3.827390 |
| 53               | 9                | 0              | 3.620962                | 0.422680  | -4.098290 |
| 54               | 1                | 0              | -4.423807               | 4.786181  | -1.120866 |
| 55               | 6                | 0              | 4.684072                | -0.693823 | 1.831637  |
| 56               | 1                | 0              | -5.979929               | 2.883243  | -0.943896 |
| 57               | 1                | 0              | 3.712155                | 2.370589  | -1.542269 |
| 58               | 1                | 0              | 4.823635                | 1.719126  | 0.570073  |
| 59               | 1                | 0              | 3.375746                | -2.311809 | 0.118885  |
| 60               | 1                | 0              | 2.436357                | -1.726069 | -2.107600 |
| 61               | 1                | 0              | -2.017492               | 4.483349  | -0.638381 |
| 62               | 1                | 0              | -2.406913               | -4.150973 | -1.283807 |
| 63               | 1                | 0              | -4.828017               | -4.158349 | -1.798849 |
| 64               | 1                | 0              | -6.206217               | -2.170512 | -1.330825 |
| 65               | 1                | 0              | 0.258604                | 4.555681  | 1.707766  |
| 66               | 1                | 0              | 1.230561                | 6.747194  | 1.111081  |

|    |   |   |           |           |           |
|----|---|---|-----------|-----------|-----------|
| 67 | 1 | 0 | 1.902901  | 7.220950  | -1.236434 |
| 68 | 1 | 0 | 1.602672  | 5.470765  | -2.982216 |
| 69 | 1 | 0 | 0.661815  | 3.266888  | -2.376406 |
| 70 | 1 | 0 | 1.811333  | 1.237048  | 1.839224  |
| 71 | 1 | 0 | 2.143451  | 1.156401  | 4.280269  |
| 72 | 1 | 0 | 0.300081  | 1.845445  | 5.816664  |
| 73 | 1 | 0 | -1.864882 | 2.618342  | 4.869564  |
| 74 | 1 | 0 | -2.184668 | 2.724346  | 2.419522  |
| 75 | 1 | 0 | 1.459632  | -1.522537 | 1.871716  |
| 76 | 1 | 0 | 1.747013  | -2.165185 | 4.230899  |
| 77 | 1 | 0 | -0.018603 | -3.500324 | 5.387261  |
| 78 | 1 | 0 | -2.057046 | -4.185035 | 4.139187  |
| 79 | 1 | 0 | -2.326085 | -3.566728 | 1.759871  |
| 80 | 1 | 0 | 0.188842  | -4.873647 | 0.661088  |
| 81 | 1 | 0 | 1.073204  | -6.804632 | -0.602732 |
| 82 | 1 | 0 | 1.461559  | -6.626452 | -3.052736 |
| 83 | 1 | 0 | 0.968773  | -4.486820 | -4.226786 |
| 84 | 1 | 0 | 0.120036  | -2.541679 | -2.956703 |
| 85 | 1 | 0 | -7.339900 | -0.504780 | -0.683326 |
| 86 | 1 | 0 | -7.266448 | 1.240898  | -0.544301 |
| 87 | 1 | 0 | -6.551359 | 0.443841  | -1.961342 |
| 88 | 1 | 0 | -6.296911 | -0.735435 | 1.607975  |
| 89 | 1 | 0 | -4.754394 | 0.055533  | 1.986029  |
| 90 | 1 | 0 | -6.212485 | 1.037392  | 1.743620  |
| 91 | 9 | 0 | 5.769336  | 0.043284  | 2.151373  |
| 92 | 9 | 0 | 3.769681  | -0.477962 | 2.831796  |
| 93 | 9 | 0 | 5.032302  | -1.995239 | 1.923125  |

(Xantphos)Pd(CF<sub>3</sub>)<sub>2</sub>

SCF Done: E(RB3LYP) = -2395.61097841 A.U.

| Center<br>Number | Atomic<br>Number | Atomic<br>Type | Coordinates (Angstroms) |           |           |
|------------------|------------------|----------------|-------------------------|-----------|-----------|
|                  |                  |                | X                       | Y         | Z         |
| 1                | 6                | 0              | 3.748539                | -1.072474 | -1.820396 |
| 2                | 6                | 0              | 3.674601                | -0.603302 | -0.502470 |
| 3                | 6                | 0              | 4.826561                | -0.601651 | 0.291546  |
| 4                | 6                | 0              | 6.037305                | -1.069511 | -0.226286 |
| 5                | 6                | 0              | 6.106976                | -1.533416 | -1.540225 |
| 6                | 6                | 0              | 4.959994                | -1.531121 | -2.337060 |
| 7                | 15               | 0              | 2.008912                | 0.042183  | 0.110417  |
| 8                | 6                | 0              | 2.326714                | 0.369707  | 1.939757  |
| 9                | 6                | 0              | 2.419978                | -0.734185 | 2.801148  |
| 10               | 6                | 0              | 2.677854                | -0.544323 | 4.158964  |
| 11               | 6                | 0              | 2.822440                | 0.745843  | 4.674786  |
| 12               | 6                | 0              | 2.713946                | 1.845920  | 3.823935  |
| 13               | 6                | 0              | 2.473961                | 1.659992  | 2.460003  |
| 14               | 46               | 0              | 0.077522                | -1.647620 | -0.602774 |
| 15               | 15               | 0              | -2.097007               | -0.244028 | 0.144004  |
| 16               | 6                | 0              | -1.847739               | 0.194564  | 1.957524  |
| 17               | 6                | 0              | -1.234764               | -0.759267 | 2.779642  |
| 18               | 6                | 0              | -1.071108               | -0.512686 | 4.143752  |
| 19               | 6                | 0              | -1.507613               | 0.693108  | 4.694772  |
| 20               | 6                | 0              | -2.114808               | 1.649410  | 3.878360  |
| 21               | 6                | 0              | -2.289560               | 1.399990  | 2.515777  |
| 22               | 6                | 0              | -1.072800               | -2.802298 | -1.806560 |
| 23               | 9                | 0              | -2.034304               | -3.535442 | -1.191610 |
| 24               | 9                | 0              | -0.425440               | -3.650727 | -2.637598 |
| 25               | 9                | 0              | -1.738201               | -1.925509 | -2.650660 |
| 26               | 6                | 0              | -2.509680               | 1.414689  | -0.645386 |
| 27               | 6                | 0              | -1.477977               | 2.352806  | -0.767372 |
| 28               | 6                | 0              | -1.642329               | 3.600308  | -1.377540 |
| 29               | 6                | 0              | -2.905718               | 3.886049  | -1.909362 |
| 30               | 6                | 0              | -3.953864               | 2.972158  | -1.807239 |
| 31               | 6                | 0              | -3.762459               | 1.746610  | -1.167864 |
| 32               | 6                | 0              | -0.476878               | 4.594665  | -1.336741 |
| 33               | 6                | 0              | 0.834414                | 3.798686  | -1.368389 |
| 34               | 6                | 0              | 0.874148                | 2.532871  | -0.765517 |

|    |   |   |           |           |           |
|----|---|---|-----------|-----------|-----------|
| 35 | 8 | 0 | -0.265583 | 1.984220  | -0.224061 |
| 36 | 6 | 0 | 2.045408  | 1.770703  | -0.662793 |
| 37 | 6 | 0 | 3.225849  | 2.320940  | -1.176724 |
| 38 | 6 | 0 | 3.218146  | 3.570703  | -1.792992 |
| 39 | 6 | 0 | 2.032164  | 4.296762  | -1.891274 |
| 40 | 6 | 0 | -0.555818 | 5.612196  | -2.489834 |
| 41 | 6 | 0 | -0.544051 | 5.363646  | 0.014765  |
| 42 | 6 | 0 | -3.798521 | -1.078777 | 0.189488  |
| 43 | 6 | 0 | -4.341813 | -1.615438 | -0.987424 |
| 44 | 6 | 0 | -5.601667 | -2.215002 | -0.973379 |
| 45 | 6 | 0 | -6.329027 | -2.302247 | 0.215017  |
| 46 | 6 | 0 | -5.790233 | -1.779469 | 1.390237  |
| 47 | 6 | 0 | -4.534924 | -1.166537 | 1.378280  |
| 48 | 1 | 0 | 4.139763  | 3.980290  | -2.196068 |
| 49 | 1 | 0 | 2.048347  | 5.268678  | -2.372406 |
| 50 | 1 | 0 | 4.151568  | 1.762099  | -1.108678 |
| 51 | 1 | 0 | -4.583203 | 1.042839  | -1.087694 |
| 52 | 1 | 0 | -4.927629 | 3.218929  | -2.220338 |
| 53 | 1 | 0 | -3.083022 | 4.836647  | -2.400589 |
| 54 | 1 | 0 | 4.785555  | -0.241533 | 1.314204  |
| 55 | 1 | 0 | 6.924826  | -1.069443 | 0.401168  |
| 56 | 1 | 0 | 7.048754  | -1.898826 | -1.940911 |
| 57 | 1 | 0 | 5.002827  | -1.898591 | -3.358644 |
| 58 | 1 | 0 | 2.858350  | -1.093438 | -2.441628 |
| 59 | 1 | 0 | 2.301082  | -1.738300 | 2.407646  |
| 60 | 1 | 0 | 2.762279  | -1.407378 | 4.814285  |
| 61 | 1 | 0 | 3.018436  | 0.892003  | 5.733749  |
| 62 | 1 | 0 | 2.823953  | 2.853308  | 4.216984  |
| 63 | 1 | 0 | 2.407608  | 2.523000  | 1.805498  |
| 64 | 1 | 0 | -0.886121 | -1.696407 | 2.352317  |
| 65 | 1 | 0 | -0.592448 | -1.258781 | 4.771261  |
| 66 | 1 | 0 | -1.374386 | 0.887467  | 5.755614  |
| 67 | 1 | 0 | -2.458715 | 2.589515  | 4.302044  |
| 68 | 1 | 0 | -2.776168 | 2.142123  | 1.890204  |
| 69 | 1 | 0 | -4.136044 | -0.759601 | 2.300432  |
| 70 | 1 | 0 | -6.345320 | -1.843276 | 2.322517  |
| 71 | 1 | 0 | -7.305908 | -2.778370 | 0.224998  |
| 72 | 1 | 0 | -6.007028 | -2.626181 | -1.893997 |
| 73 | 1 | 0 | -3.779257 | -1.583294 | -1.911582 |
| 74 | 1 | 0 | -1.484206 | 6.188187  | -2.436686 |
| 75 | 1 | 0 | 0.260133  | 6.338148  | -2.427699 |
| 76 | 1 | 0 | -0.508625 | 5.120332  | -3.466981 |
| 77 | 1 | 0 | -1.482595 | 5.925268  | 0.087611  |
| 78 | 1 | 0 | -0.492308 | 4.674705  | 0.864080  |
| 79 | 1 | 0 | 0.291842  | 6.068324  | 0.094632  |
| 80 | 6 | 0 | 1.339502  | -3.243020 | -0.496396 |
| 81 | 9 | 0 | 2.252551  | -3.060465 | 0.523073  |
| 82 | 9 | 0 | 0.681282  | -4.386382 | -0.164135 |
| 83 | 9 | 0 | 2.075978  | -3.534767 | -1.594933 |

(Xantphos)Pd(Ar)<sub>2</sub>:

SCF Done: E(RB3LYP) = -2857.70117897 A.U.

| Center<br>Number | Atomic<br>Number | Atomic<br>Type | Coordinates (Angstroms) |           |           |
|------------------|------------------|----------------|-------------------------|-----------|-----------|
|                  |                  |                | X                       | Y         | Z         |
| 1                | 6                | 0              | 2.338331                | -1.857549 | -1.689460 |
| 2                | 6                | 0              | 2.058402                | -1.464911 | -0.368583 |
| 3                | 6                | 0              | 2.747952                | -2.111832 | 0.667031  |
| 4                | 6                | 0              | 3.637416                | -3.154726 | 0.403135  |
| 5                | 6                | 0              | 3.868132                | -3.562561 | -0.913492 |
| 6                | 6                | 0              | 3.223291                | -2.900947 | -1.963409 |
| 7                | 46               | 0              | 0.608175                | -0.067565 | -0.092186 |
| 8                | 15               | 0              | -0.950987               | 2.087046  | -0.178398 |
| 9                | 6                | 0              | -0.027424               | 3.488165  | -1.048287 |
| 10               | 6                | 0              | 0.321539                | 4.689115  | -0.425040 |
| 11               | 6                | 0              | 1.015779                | 5.674926  | -1.133963 |
| 12               | 6                | 0              | 1.352749                | 5.474910  | -2.471842 |



|    |    |   |           |           |           |
|----|----|---|-----------|-----------|-----------|
| 13 | 6  | 0 | 0.997765  | 4.279353  | -3.102375 |
| 14 | 6  | 0 | 0.320361  | 3.289662  | -2.392624 |
| 15 | 6  | 0 | 4.729861  | -4.753435 | -1.201441 |
| 16 | 9  | 0 | 3.997185  | -5.902911 | -1.274361 |
| 17 | 6  | 0 | 2.272821  | 1.117956  | -0.024729 |
| 18 | 6  | 0 | 2.925693  | 1.631489  | -1.155310 |
| 19 | 6  | 0 | 4.024363  | 2.483436  | -1.037918 |
| 20 | 6  | 0 | 4.508749  | 2.835086  | 0.225298  |
| 21 | 6  | 0 | 3.895463  | 2.310447  | 1.365477  |
| 22 | 6  | 0 | 2.798477  | 1.456089  | 1.234969  |
| 23 | 6  | 0 | 5.722250  | 3.706216  | 0.352370  |
| 24 | 9  | 0 | 6.874757  | 2.991438  | 0.319461  |
| 25 | 15 | 0 | -1.168059 | -1.920692 | 0.503090  |
| 26 | 6  | 0 | -1.924475 | -1.465867 | 2.169140  |
| 27 | 6  | 0 | -1.169858 | -0.671093 | 3.040132  |
| 28 | 6  | 0 | -1.673134 | -0.323423 | 4.295193  |
| 29 | 6  | 0 | -2.937458 | -0.764759 | 4.688116  |
| 30 | 6  | 0 | -3.696425 | -1.556090 | 3.822956  |
| 31 | 6  | 0 | -3.192605 | -1.907372 | 2.569038  |
| 32 | 6  | 0 | -2.697005 | -2.299659 | -0.533638 |
| 33 | 6  | 0 | -3.514225 | -1.224061 | -0.894838 |
| 34 | 6  | 0 | -4.674892 | -1.359775 | -1.662178 |
| 35 | 6  | 0 | -4.988701 | -2.647419 | -2.114061 |
| 36 | 6  | 0 | -4.187875 | -3.740824 | -1.783524 |
| 37 | 6  | 0 | -3.054834 | -3.572920 | -0.985232 |
| 38 | 6  | 0 | -5.560515 | -0.124881 | -1.865192 |
| 39 | 6  | 0 | -4.650496 | 1.109242  | -1.925221 |
| 40 | 6  | 0 | -3.466943 | 1.112013  | -1.171473 |
| 41 | 8  | 0 | -3.118606 | 0.010142  | -0.426341 |
| 42 | 6  | 0 | -2.594907 | 2.205741  | -1.118309 |
| 43 | 6  | 0 | -2.965256 | 3.365276  | -1.811985 |
| 44 | 6  | 0 | -4.138095 | 3.399327  | -2.563341 |
| 45 | 6  | 0 | -4.963034 | 2.276319  | -2.628646 |
| 46 | 6  | 0 | -6.436593 | -0.251280 | -3.124912 |
| 47 | 6  | 0 | -6.487886 | 0.014585  | -0.622987 |
| 48 | 6  | 0 | -0.499355 | -3.657605 | 0.814715  |
| 49 | 6  | 0 | 0.237783  | -4.283508 | -0.200453 |
| 50 | 6  | 0 | 0.767627  | -5.559883 | -0.008736 |
| 51 | 6  | 0 | 0.565270  | -6.225493 | 1.202199  |
| 52 | 6  | 0 | -0.168694 | -5.609803 | 2.216508  |
| 53 | 6  | 0 | -0.699646 | -4.331479 | 2.025752  |
| 54 | 6  | 0 | -1.386698 | 2.809073  | 1.509254  |
| 55 | 6  | 0 | -0.356835 | 2.990004  | 2.445709  |
| 56 | 6  | 0 | -0.638368 | 3.496378  | 3.715471  |
| 57 | 6  | 0 | -1.952179 | 3.809902  | 4.071772  |
| 58 | 6  | 0 | -2.980422 | 3.621693  | 3.148027  |
| 59 | 6  | 0 | -2.700009 | 3.129718  | 1.870802  |
| 60 | 9  | 0 | 5.806892  | 4.612880  | -0.651096 |
| 61 | 9  | 0 | 5.733855  | 4.397533  | 1.518010  |
| 62 | 9  | 0 | 5.375988  | -4.647530 | -2.385784 |
| 63 | 9  | 0 | 5.664797  | -4.961060 | -0.247572 |
| 64 | 1  | 0 | -4.408486 | 4.302300  | -3.102986 |
| 65 | 1  | 0 | -5.866882 | 2.321179  | -3.226627 |
| 66 | 1  | 0 | 2.578932  | 1.369186  | -2.150393 |
| 67 | 1  | 0 | 4.502843  | 2.880903  | -1.928259 |
| 68 | 1  | 0 | 4.275587  | 2.566406  | 2.350237  |
| 69 | 1  | 0 | 2.358264  | 1.041357  | 2.139336  |
| 70 | 1  | 0 | -2.322851 | 4.237687  | -1.779818 |
| 71 | 1  | 0 | -2.444463 | -4.429687 | -0.722432 |
| 72 | 1  | 0 | -4.454149 | -4.731722 | -2.139927 |
| 73 | 1  | 0 | -5.872901 | -2.807097 | -2.721846 |
| 74 | 1  | 0 | 0.056879  | 4.865483  | 0.612048  |
| 75 | 1  | 0 | 1.287671  | 6.601382  | -0.635291 |
| 76 | 1  | 0 | 1.890604  | 6.243088  | -3.020657 |
| 77 | 1  | 0 | 1.256782  | 4.113552  | -4.144786 |
| 78 | 1  | 0 | 0.056597  | 2.359052  | -2.889151 |
| 79 | 1  | 0 | 0.667727  | 2.746650  | 2.180334  |
| 80 | 1  | 0 | 0.171043  | 3.644447  | 4.425686  |
| 81 | 1  | 0 | -2.171663 | 4.199721  | 5.062162  |

|     |   |   |           |           |           |
|-----|---|---|-----------|-----------|-----------|
| 82  | 1 | 0 | -4.005681 | 3.863230  | 3.415941  |
| 83  | 1 | 0 | -3.508879 | 2.998203  | 1.159629  |
| 84  | 1 | 0 | -0.191458 | -0.315067 | 2.727518  |
| 85  | 1 | 0 | -1.082532 | 0.303811  | 4.956598  |
| 86  | 1 | 0 | -3.332141 | -0.490522 | 5.662838  |
| 87  | 1 | 0 | -4.681860 | -1.902664 | 4.123544  |
| 88  | 1 | 0 | -3.787941 | -2.526443 | 1.904206  |
| 89  | 1 | 0 | -1.265394 | -3.863534 | 2.823975  |
| 90  | 1 | 0 | -0.328439 | -6.120615 | 3.162589  |
| 91  | 1 | 0 | 0.987064  | -7.215017 | 1.356893  |
| 92  | 1 | 0 | 1.371405  | -6.012427 | -0.789123 |
| 93  | 1 | 0 | 0.428211  | -3.763434 | -1.133134 |
| 94  | 1 | 0 | -7.095119 | -1.121937 | -3.053701 |
| 95  | 1 | 0 | -7.088796 | 0.619828  | -3.236666 |
| 96  | 1 | 0 | -5.830541 | -0.349108 | -4.031711 |
| 97  | 1 | 0 | -7.136440 | -0.864296 | -0.531506 |
| 98  | 1 | 0 | -5.904000 | 0.104781  | 0.298545  |
| 99  | 1 | 0 | -7.118853 | 0.906065  | -0.716843 |
| 100 | 1 | 0 | 2.589165  | -1.812668 | 1.699594  |
| 101 | 1 | 0 | 4.150257  | -3.653660 | 1.219940  |
| 102 | 1 | 0 | 3.418841  | -3.197338 | -2.990145 |
| 103 | 1 | 0 | 1.857407  | -1.350509 | -2.522787 |

TS<sup>Ar-Ar</sup>:

SCF Done: E(RB3LYP) = -2857.69036667 A.U.

| Center<br>Number | Atomic<br>Number | Atomic<br>Type | Coordinates (Angstroms) |           |           |
|------------------|------------------|----------------|-------------------------|-----------|-----------|
|                  |                  |                | X                       | Y         | Z         |
| 1                | 6                | 0              | 1.716990                | 4.188940  | 2.077221  |
| 2                | 6                | 0              | 1.165763                | 3.523210  | 0.974167  |
| 3                | 6                | 0              | 0.335573                | 4.231095  | 0.094504  |
| 4                | 6                | 0              | 0.068075                | 5.585215  | 0.306750  |
| 5                | 6                | 0              | 0.622615                | 6.242220  | 1.406599  |
| 6                | 6                | 0              | 1.445092                | 5.542009  | 2.291249  |
| 7                | 15               | 0              | 1.490628                | 1.700062  | 0.611475  |
| 8                | 6                | 0              | 2.266782                | 1.090172  | 2.219347  |
| 9                | 6                | 0              | 1.445560                | 0.426167  | 3.138000  |
| 10               | 6                | 0              | 1.964669                | -0.032477 | 4.350196  |
| 11               | 6                | 0              | 3.312475                | 0.165531  | 4.653805  |
| 12               | 6                | 0              | 4.139074                | 0.823376  | 3.740576  |
| 13               | 6                | 0              | 3.619506                | 1.284042  | 2.528989  |
| 14               | 46               | 0              | -0.574183               | 0.271123  | -0.024831 |
| 15               | 15               | 0              | 0.515686                | -2.143338 | -0.228237 |
| 16               | 6                | 0              | 2.087100                | -2.573355 | -1.194837 |
| 17               | 6                | 0              | 3.145777                | -1.658346 | -1.246602 |
| 18               | 6                | 0              | 4.284134                | -1.844416 | -2.044339 |
| 19               | 6                | 0              | 4.359228                | -3.027675 | -2.785284 |
| 20               | 6                | 0              | 3.345859                | -3.984729 | -2.717258 |
| 21               | 6                | 0              | 2.218540                | -3.759227 | -1.929333 |
| 22               | 6                | 0              | 5.392218                | -0.783963 | -1.996869 |
| 23               | 6                | 0              | 4.732366                | 0.579574  | -1.754812 |
| 24               | 6                | 0              | 3.602688                | 0.627344  | -0.931568 |
| 25               | 8                | 0              | 3.030905                | -0.535708 | -0.460730 |
| 26               | 6                | 0              | 2.998581                | 1.819728  | -0.517762 |
| 27               | 6                | 0              | 3.537108                | 3.020522  | -0.988993 |
| 28               | 6                | 0              | 4.636645                | 3.008443  | -1.849402 |
| 29               | 6                | 0              | 5.230650                | 1.802028  | -2.221269 |
| 30               | 6                | 0              | 6.244778                | -0.789586 | -3.278129 |
| 31               | 6                | 0              | 6.314043                | -1.095432 | -0.781905 |
| 32               | 6                | 0              | -0.707376               | -3.290493 | -1.103807 |
| 33               | 6                | 0              | -1.394731               | -4.320700 | -0.455931 |
| 34               | 6                | 0              | -2.336940               | -5.087076 | -1.149177 |
| 35               | 6                | 0              | -2.581143               | -4.848004 | -2.501008 |
| 36               | 6                | 0              | -1.890304               | -3.825802 | -3.157771 |
| 37               | 6                | 0              | -0.971448               | -3.043392 | -2.459906 |
| 38               | 6                | 0              | 0.795073                | -2.988638 | 1.435233  |
| 39               | 6                | 0              | 1.963350                | -3.695266 | 1.741327  |

|     |   |   |           |           |           |
|-----|---|---|-----------|-----------|-----------|
| 40  | 6 | 0 | 2.128697  | -4.272571 | 3.002865  |
| 41  | 6 | 0 | 1.124970  | -4.161016 | 3.965592  |
| 42  | 6 | 0 | -0.045670 | -3.460444 | 3.665022  |
| 43  | 6 | 0 | -0.206202 | -2.868473 | 2.411374  |
| 44  | 1 | 0 | 3.432099  | -4.905459 | -3.287089 |
| 45  | 1 | 0 | 5.220358  | -3.216120 | -3.417538 |
| 46  | 1 | 0 | 1.424722  | -4.497330 | -1.903080 |
| 47  | 1 | 0 | 3.092436  | 3.963447  | -0.689941 |
| 48  | 1 | 0 | 5.041673  | 3.945802  | -2.219937 |
| 49  | 1 | 0 | 6.097826  | 1.820460  | -2.872703 |
| 50  | 1 | 0 | -1.206931 | -4.528814 | 0.592011  |
| 51  | 1 | 0 | -2.879781 | -5.869304 | -0.626510 |
| 52  | 1 | 0 | -3.308366 | -5.449822 | -3.039359 |
| 53  | 1 | 0 | -2.074774 | -3.630214 | -4.211037 |
| 54  | 1 | 0 | -0.451218 | -2.239775 | -2.975588 |
| 55  | 1 | 0 | -1.116580 | -2.319944 | 2.186048  |
| 56  | 1 | 0 | -0.835310 | -3.371955 | 4.406838  |
| 57  | 1 | 0 | 1.252768  | -4.617376 | 4.943601  |
| 58  | 1 | 0 | 3.042874  | -4.815471 | 3.228589  |
| 59  | 1 | 0 | 2.747255  | -3.798132 | 0.997968  |
| 60  | 1 | 0 | 0.400301  | 0.254981  | 2.895048  |
| 61  | 1 | 0 | 1.318171  | -0.557377 | 5.047731  |
| 62  | 1 | 0 | 3.718575  | -0.195442 | 5.595039  |
| 63  | 1 | 0 | 5.190183  | 0.979361  | 3.969732  |
| 64  | 1 | 0 | 4.270363  | 1.794451  | 1.825165  |
| 65  | 1 | 0 | 2.355954  | 3.655266  | 2.772836  |
| 66  | 1 | 0 | 1.876143  | 6.046663  | 3.152185  |
| 67  | 1 | 0 | 0.407172  | 7.293626  | 1.578264  |
| 68  | 1 | 0 | -0.599805 | 6.109824  | -0.369064 |
| 69  | 1 | 0 | -0.119939 | 3.721563  | -0.748776 |
| 70  | 1 | 0 | 7.039336  | -0.040066 | -3.217627 |
| 71  | 1 | 0 | 6.740586  | -1.755509 | -3.412429 |
| 72  | 1 | 0 | 5.640980  | -0.583394 | -4.168166 |
| 73  | 1 | 0 | 7.105813  | -0.341589 | -0.701070 |
| 74  | 1 | 0 | 5.747428  | -1.096522 | 0.154556  |
| 75  | 1 | 0 | 6.780891  | -2.080131 | -0.900777 |
| 76  | 6 | 0 | -2.114457 | 1.644802  | -0.313729 |
| 77  | 6 | 0 | -2.234160 | 2.084913  | -1.651456 |
| 78  | 6 | 0 | -2.793135 | 3.320633  | -1.964484 |
| 79  | 6 | 0 | -3.277032 | 4.150739  | -0.946294 |
| 80  | 6 | 0 | -3.188505 | 3.726276  | 0.383913  |
| 81  | 6 | 0 | -2.618333 | 2.493822  | 0.691314  |
| 82  | 1 | 0 | -1.889608 | 1.448459  | -2.462061 |
| 83  | 1 | 0 | -2.868344 | 3.636486  | -3.001137 |
| 84  | 6 | 0 | -3.824189 | 5.502654  | -1.284761 |
| 85  | 1 | 0 | -3.567605 | 4.361250  | 1.178657  |
| 86  | 1 | 0 | -2.576192 | 2.185477  | 1.731808  |
| 87  | 6 | 0 | -2.584522 | -0.294536 | -0.018625 |
| 88  | 6 | 0 | -3.228887 | -0.881219 | -1.124432 |
| 89  | 6 | 0 | -4.274422 | -1.784480 | -0.961332 |
| 90  | 6 | 0 | -4.719818 | -2.124300 | 0.320631  |
| 91  | 6 | 0 | -4.122329 | -1.526599 | 1.434534  |
| 92  | 6 | 0 | -3.083162 | -0.613911 | 1.263202  |
| 93  | 1 | 0 | -2.911687 | -0.630070 | -2.131660 |
| 94  | 1 | 0 | -4.742194 | -2.234392 | -1.831331 |
| 95  | 6 | 0 | -5.770969 | -3.177149 | 0.492309  |
| 96  | 1 | 0 | -4.477271 | -1.767604 | 2.432141  |
| 97  | 1 | 0 | -2.656008 | -0.139777 | 2.143212  |
| 98  | 9 | 0 | -6.443504 | -3.048899 | 1.659581  |
| 99  | 9 | 0 | -6.684824 | -3.157217 | -0.505733 |
| 100 | 9 | 0 | -5.237714 | -4.429713 | 0.494021  |
| 101 | 9 | 0 | -4.662060 | 5.974736  | -0.335703 |
| 102 | 9 | 0 | -2.836053 | 6.435989  | -1.421342 |
| 103 | 9 | 0 | -4.496879 | 5.503608  | -2.458705 |

-----  
**(bpy)Pd(Ar)(CF<sub>3</sub>) (2a):**

SCF Done: E(RB3LYP) = -1528.45853790 A.U.  
 -----

| Center<br>Number | Atomic<br>Number | Atomic<br>Type | Coordinates (Angstroms) |           |           |
|------------------|------------------|----------------|-------------------------|-----------|-----------|
|                  |                  |                | X                       | Y         | Z         |
| 1                | 6                | 0              | -2.936582               | 3.305847  | 0.115960  |
| 2                | 6                | 0              | -2.536771               | 1.965685  | 0.045475  |
| 3                | 7                | 0              | -1.223034               | 1.637097  | 0.026099  |
| 4                | 6                | 0              | -0.297782               | 2.605497  | 0.070215  |
| 5                | 6                | 0              | -0.626504               | 3.957740  | 0.136794  |
| 6                | 6                | 0              | -1.973347               | 4.310393  | 0.161903  |
| 7                | 6                | 0              | -3.505235               | 0.837003  | -0.007721 |
| 8                | 6                | 0              | -4.890960               | 1.030713  | -0.057970 |
| 9                | 6                | 0              | -5.737516               | -0.074157 | -0.104640 |
| 10               | 6                | 0              | -5.182567               | -1.350923 | -0.100874 |
| 11               | 6                | 0              | -3.795191               | -1.472664 | -0.052738 |
| 12               | 7                | 0              | -2.979008               | -0.410477 | -0.008318 |
| 13               | 1                | 0              | -3.309539               | -2.439639 | -0.048435 |
| 14               | 1                | 0              | -5.802095               | -2.240700 | -0.136098 |
| 15               | 1                | 0              | -6.813727               | 0.065649  | -0.144725 |
| 16               | 1                | 0              | 0.732747                | 2.268559  | 0.044922  |
| 17               | 1                | 0              | 0.158867                | 4.705266  | 0.170264  |
| 18               | 1                | 0              | -2.275421               | 5.352027  | 0.217897  |
| 19               | 1                | 0              | -5.311418               | 2.028988  | -0.065751 |
| 20               | 1                | 0              | -3.986868               | 3.569725  | 0.140319  |
| 21               | 46               | 0              | -0.767346               | -0.507099 | 0.001594  |
| 22               | 6                | 0              | 1.236173                | -0.350611 | -0.021238 |
| 23               | 6                | 0              | -0.589059               | -2.516369 | 0.005416  |
| 24               | 6                | 0              | 2.013554                | -0.574483 | 1.129045  |
| 25               | 6                | 0              | 3.386559                | -0.329575 | 1.134910  |
| 26               | 6                | 0              | 4.022371                | 0.132670  | -0.022529 |
| 27               | 6                | 0              | 3.273318                | 0.341990  | -1.182441 |
| 28               | 6                | 0              | 1.896095                | 0.103374  | -1.176621 |
| 29               | 1                | 0              | 1.545831                | -0.947073 | 2.036013  |
| 30               | 1                | 0              | 3.966076                | -0.493720 | 2.038998  |
| 31               | 6                | 0              | 5.507510                | 0.342418  | -0.028070 |
| 32               | 1                | 0              | 3.762893                | 0.694481  | -2.085464 |
| 33               | 1                | 0              | 1.335290                | 0.276562  | -2.092268 |
| 34               | 9                | 0              | 0.611116                | -3.130448 | 0.079820  |
| 35               | 9                | 0              | -1.324746               | -3.030090 | 1.060976  |
| 36               | 9                | 0              | -1.203493               | -3.037737 | -1.115343 |
| 37               | 9                | 0              | 5.894285                | 1.234778  | -0.971405 |
| 38               | 9                | 0              | 5.959613                | 0.801146  | 1.164584  |
| 39               | 9                | 0              | 6.188246                | -0.802893 | -0.278934 |

**TSrd (bpy)**

SCF Done: E(RB3LYP) = -1528.40183384 A.U.

| Center<br>Number | Atomic<br>Number | Atomic<br>Type | Coordinates (Angstroms) |           |           |
|------------------|------------------|----------------|-------------------------|-----------|-----------|
|                  |                  |                | X                       | Y         | Z         |
| 1                | 6                | 0              | 1.844394                | -0.802886 | -1.215286 |
| 2                | 6                | 0              | 1.185309                | -0.970794 | 0.028474  |
| 3                | 6                | 0              | 1.890610                | -0.626759 | 1.205976  |
| 4                | 6                | 0              | 3.151241                | -0.040152 | 1.135404  |
| 5                | 6                | 0              | 3.761614                | 0.175849  | -0.105272 |
| 6                | 6                | 0              | 3.101327                | -0.214961 | -1.279203 |
| 7                | 46               | 0              | -0.787979               | -0.603410 | 0.036286  |
| 8                | 7                | 0              | -3.057023               | -0.431137 | -0.029903 |
| 9                | 6                | 0              | -3.577483               | 0.811970  | -0.110030 |
| 10               | 6                | 0              | -4.946169               | 1.009715  | -0.337128 |
| 11               | 6                | 0              | -5.785353               | -0.094508 | -0.462868 |
| 12               | 6                | 0              | -5.239851               | -1.373675 | -0.367523 |
| 13               | 6                | 0              | -3.867139               | -1.490419 | -0.156520 |
| 14               | 6                | 0              | -2.617939               | 1.943317  | 0.041961  |
| 15               | 6                | 0              | -3.034355               | 3.264659  | 0.253899  |
| 16               | 6                | 0              | -2.078780               | 4.271189  | 0.372227  |
| 17               | 6                | 0              | -0.728366               | 3.936982  | 0.283733  |
| 18               | 6                | 0              | -0.392191               | 2.597784  | 0.091016  |
| 19               | 7                | 0              | -1.307726               | 1.629515  | -0.026744 |

|    |   |   |           |           |           |
|----|---|---|-----------|-----------|-----------|
| 20 | 6 | 0 | 5.086435  | 0.869246  | -0.188258 |
| 21 | 9 | 0 | 5.824855  | 0.704087  | 0.933560  |
| 22 | 9 | 0 | 5.829886  | 0.429988  | -1.230884 |
| 23 | 9 | 0 | 4.947638  | 2.211822  | -0.360690 |
| 24 | 1 | 0 | -3.382968 | -2.459961 | -0.089397 |
| 25 | 1 | 0 | -5.855385 | -2.262474 | -0.460040 |
| 26 | 1 | 0 | -6.847819 | 0.045047  | -0.640139 |
| 27 | 1 | 0 | 0.643517  | 2.275184  | 0.029941  |
| 28 | 1 | 0 | 0.049826  | 4.688553  | 0.368173  |
| 29 | 1 | 0 | -2.387156 | 5.299361  | 0.538020  |
| 30 | 1 | 0 | -5.352106 | 2.010148  | -0.434137 |
| 31 | 1 | 0 | -4.087273 | 3.506348  | 0.344660  |
| 32 | 1 | 0 | 1.441212  | -0.822819 | 2.174533  |
| 33 | 1 | 0 | 3.670417  | 0.239659  | 2.047054  |
| 34 | 1 | 0 | 3.583443  | -0.069096 | -2.241325 |
| 35 | 1 | 0 | 1.357789  | -1.130470 | -2.129456 |
| 36 | 6 | 0 | 0.298172  | -2.641888 | 0.234159  |
| 37 | 9 | 0 | 1.397256  | -3.406272 | -0.004521 |
| 38 | 9 | 0 | -0.043072 | -2.898075 | 1.526053  |
| 39 | 9 | 0 | -0.661237 | -3.230363 | -0.566749 |

**(bpy)Pd(CF<sub>3</sub>)<sub>2</sub>**

SCF Done: E(RB3LYP) = -1297.41213993 A.U.

| Center<br>Number | Atomic<br>Number | Atomic<br>Type | Coordinates (Angstroms) |           |           |
|------------------|------------------|----------------|-------------------------|-----------|-----------|
|                  |                  |                | X                       | Y         | Z         |
| 1                | 6                | 0              | 3.533768                | -1.426490 | -0.213100 |
| 2                | 6                | 0              | 2.336436                | -0.722504 | -0.036911 |
| 3                | 7                | 0              | 1.148231                | -1.369675 | 0.027712  |
| 4                | 6                | 0              | 1.128480                | -2.706973 | -0.073832 |
| 5                | 6                | 0              | 2.282452                | -3.469807 | -0.242841 |
| 6                | 6                | 0              | 3.507908                | -2.814691 | -0.314771 |
| 7                | 6                | 0              | 2.297053                | 0.759085  | 0.067112  |
| 8                | 7                | 0              | 1.076898                | 1.337879  | -0.014032 |
| 9                | 6                | 0              | 0.976538                | 2.673182  | 0.061177  |
| 10               | 6                | 0              | 2.084608                | 3.502238  | 0.223395  |
| 11               | 6                | 0              | 3.344052                | 2.917808  | 0.321384  |
| 12               | 6                | 0              | 3.451069                | 1.531879  | 0.244682  |
| 13               | 46               | 0              | -0.652462               | -0.051606 | 0.007116  |
| 14               | 1                | 0              | -0.024178               | 3.076446  | -0.007614 |
| 15               | 1                | 0              | 1.950088                | 4.577186  | 0.278238  |
| 16               | 1                | 0              | 4.232365                | 3.526621  | 0.461556  |
| 17               | 1                | 0              | 0.149583                | -3.161375 | -0.012018 |
| 18               | 1                | 0              | 2.208073                | -4.549291 | -0.319841 |
| 19               | 1                | 0              | 4.431024                | -3.369245 | -0.455244 |
| 20               | 1                | 0              | 4.422016                | 1.061078  | 0.339928  |
| 21               | 1                | 0              | 4.476765                | -0.899080 | -0.290437 |
| 22               | 6                | 0              | -2.146991               | -1.386619 | 0.255665  |
| 23               | 9                | 0              | -3.091585               | -1.016966 | 1.155395  |
| 24               | 9                | 0              | -2.804296               | -1.716486 | -0.886153 |
| 25               | 9                | 0              | -1.660583               | -2.589957 | 0.747693  |
| 26               | 6                | 0              | -2.058325               | 1.369183  | -0.269781 |
| 27               | 9                | 0              | -3.340059               | 1.041610  | -0.519770 |
| 28               | 9                | 0              | -2.089889               | 2.249131  | 0.787904  |
| 29               | 9                | 0              | -1.661440               | 2.141153  | -1.346261 |

**(bpy)Pd(Ar)<sub>2</sub>**

SCF Done: E(RB3LYP) = -1759.50237678 A.U.

| Center<br>Number | Atomic<br>Number | Atomic<br>Type | Coordinates (Angstroms) |           |           |
|------------------|------------------|----------------|-------------------------|-----------|-----------|
|                  |                  |                | X                       | Y         | Z         |
| 1                | 7                | 0              | -1.275172               | -2.717499 | -0.008299 |
| 2                | 6                | 0              | -0.638509               | -3.912262 | 0.000506  |
| 3                | 6                | 0              | -1.364718               | -5.109517 | 0.017728  |
| 4                | 6                | 0              | -2.756824               | -5.068938 | 0.022727  |

|    |    |   |           |           |           |
|----|----|---|-----------|-----------|-----------|
| 5  | 6  | 0 | -3.398281 | -3.832579 | 0.009644  |
| 6  | 6  | 0 | -2.614218 | -2.680781 | -0.004957 |
| 7  | 6  | 0 | 0.849340  | -3.868924 | -0.008979 |
| 8  | 7  | 0 | 1.415553  | -2.639187 | 0.003298  |
| 9  | 6  | 0 | 2.750179  | -2.524819 | -0.002560 |
| 10 | 6  | 0 | 3.599677  | -3.629204 | -0.022381 |
| 11 | 6  | 0 | 3.031029  | -4.900675 | -0.037969 |
| 12 | 6  | 0 | 1.643630  | -5.022028 | -0.030878 |
| 13 | 46 | 0 | 0.018579  | -0.927520 | 0.001833  |
| 14 | 6  | 0 | -1.403284 | 0.496286  | 0.006394  |
| 15 | 6  | 0 | -2.116301 | 0.792140  | -1.170837 |
| 16 | 6  | 0 | -3.203789 | 1.668852  | -1.165880 |
| 17 | 6  | 0 | -3.605059 | 2.277219  | 0.026414  |
| 18 | 6  | 0 | -2.903556 | 2.008882  | 1.205952  |
| 19 | 6  | 0 | -1.816564 | 1.133830  | 1.190414  |
| 20 | 6  | 0 | -4.737723 | 3.260136  | 0.029029  |
| 21 | 9  | 0 | -5.387562 | 3.285209  | 1.217592  |
| 22 | 9  | 0 | -4.319156 | 4.528347  | -0.205995 |
| 23 | 9  | 0 | -5.659441 | 2.978354  | -0.924052 |
| 24 | 1  | 0 | 3.131609  | -1.509170 | 0.013901  |
| 25 | 1  | 0 | 4.675108  | -3.486567 | -0.026564 |
| 26 | 1  | 0 | 3.655128  | -5.789257 | -0.055655 |
| 27 | 1  | 0 | -3.054068 | -1.689011 | -0.018550 |
| 28 | 1  | 0 | -4.480189 | -3.752621 | 0.011837  |
| 29 | 1  | 0 | -3.328273 | -5.992316 | 0.036674  |
| 30 | 1  | 0 | 1.191652  | -6.006586 | -0.044318 |
| 31 | 1  | 0 | -0.856589 | -6.066307 | 0.029020  |
| 32 | 1  | 0 | -1.282139 | 0.951574  | 2.118943  |
| 33 | 1  | 0 | -3.210621 | 2.481879  | 2.134251  |
| 34 | 1  | 0 | -3.743171 | 1.876133  | -2.085727 |
| 35 | 1  | 0 | -1.825051 | 0.333671  | -2.113349 |
| 36 | 6  | 0 | 1.351558  | 0.580250  | 0.005028  |
| 37 | 6  | 0 | 2.081229  | 0.876560  | 1.172115  |
| 38 | 6  | 0 | 3.110518  | 1.821022  | 1.170607  |
| 39 | 6  | 0 | 3.432188  | 2.501432  | -0.006672 |
| 40 | 6  | 0 | 2.712078  | 2.233836  | -1.175124 |
| 41 | 6  | 0 | 1.682819  | 1.291547  | -1.162582 |
| 42 | 1  | 0 | 1.845291  | 0.369561  | 2.105228  |
| 43 | 1  | 0 | 3.655236  | 2.037910  | 2.085073  |
| 44 | 6  | 0 | 4.580776  | 3.465017  | -0.030499 |
| 45 | 1  | 0 | 2.948283  | 2.772474  | -2.088230 |
| 46 | 1  | 0 | 1.124807  | 1.118842  | -2.078954 |
| 47 | 9  | 0 | 4.415520  | 4.437004  | -0.957275 |
| 48 | 9  | 0 | 4.763538  | 4.074353  | 1.164586  |
| 49 | 9  | 0 | 5.755824  | 2.848822  | -0.327782 |

-----

**TS<sup>Ar-Ar</sup>(bpy)**

SCF Done: E(RB3LYP) = -1759.47767884 A.U.

| Center<br>Number | Atomic<br>Number | Atomic<br>Type | Coordinates (Angstroms) |           |           |
|------------------|------------------|----------------|-------------------------|-----------|-----------|
|                  |                  |                | X                       | Y         | Z         |
| 1                | 7                | 0              | 1.260118                | -2.757865 | -0.025921 |
| 2                | 6                | 0              | 0.625886                | -3.948950 | -0.057677 |
| 3                | 6                | 0              | 1.343773                | -5.144679 | -0.194489 |
| 4                | 6                | 0              | 2.732822                | -5.102335 | -0.285954 |
| 5                | 6                | 0              | 3.377274                | -3.867378 | -0.242341 |
| 6                | 6                | 0              | 2.594998                | -2.720752 | -0.115064 |
| 7                | 6                | 0              | -0.860654               | -3.906216 | 0.053472  |
| 8                | 7                | 0              | -1.425024               | -2.680015 | 0.033656  |
| 9                | 6                | 0              | -2.755656               | -2.567202 | 0.124140  |
| 10               | 6                | 0              | -3.602695               | -3.668037 | 0.240958  |
| 11               | 6                | 0              | -3.030567               | -4.938453 | 0.271693  |
| 12               | 6                | 0              | -1.646319               | -5.059874 | 0.178781  |
| 13               | 46               | 0              | -0.028305               | -0.877395 | 0.007335  |
| 14               | 6                | 0              | 0.990446                | 0.906047  | 0.024152  |
| 15               | 6                | 0              | 1.607853                | 1.285216  | 1.240136  |
| 16               | 6                | 0              | 2.826637                | 1.956487  | 1.263857  |

|    |   |   |           |           |           |
|----|---|---|-----------|-----------|-----------|
| 17 | 6 | 0 | 3.474558  | 2.284891  | 0.067943  |
| 18 | 6 | 0 | 2.879615  | 1.936048  | -1.150994 |
| 19 | 6 | 0 | 1.660118  | 1.267845  | -1.170611 |
| 20 | 6 | 0 | 4.761683  | 3.051341  | 0.079241  |
| 21 | 9 | 0 | 5.594714  | 2.653787  | -0.914465 |
| 22 | 9 | 0 | 4.572533  | 4.383189  | -0.095064 |
| 23 | 9 | 0 | 5.432814  | 2.906278  | 1.246305  |
| 24 | 1 | 0 | -3.143233 | -1.552846 | 0.102648  |
| 25 | 1 | 0 | -4.676211 | -3.525759 | 0.309451  |
| 26 | 1 | 0 | -3.650112 | -5.825103 | 0.370099  |
| 27 | 1 | 0 | 3.039842  | -1.730325 | -0.084177 |
| 28 | 1 | 0 | 4.457274  | -3.786685 | -0.309291 |
| 29 | 1 | 0 | 3.300240  | -6.022213 | -0.393282 |
| 30 | 1 | 0 | -1.189993 | -6.042229 | 0.215236  |
| 31 | 1 | 0 | 0.831498  | -6.098581 | -0.241023 |
| 32 | 1 | 0 | 1.218603  | 1.018803  | -2.131250 |
| 33 | 1 | 0 | 3.378507  | 2.182168  | -2.084103 |
| 34 | 1 | 0 | 3.283013  | 2.219387  | 2.213269  |
| 35 | 1 | 0 | 1.125818  | 1.050209  | 2.184666  |
| 36 | 6 | 0 | -0.921114 | 0.974508  | -0.013919 |
| 37 | 6 | 0 | -1.508249 | 1.394338  | -1.231838 |
| 38 | 6 | 0 | -2.673628 | 2.153837  | -1.258393 |
| 39 | 6 | 0 | -3.292223 | 2.539347  | -0.063569 |
| 40 | 6 | 0 | -2.724972 | 2.152637  | 1.156472  |
| 41 | 6 | 0 | -1.559431 | 1.393570  | 1.178753  |
| 42 | 1 | 0 | -1.041345 | 1.126259  | -2.175133 |
| 43 | 1 | 0 | -3.102498 | 2.456389  | -2.209069 |
| 44 | 6 | 0 | -4.582565 | 3.299349  | -0.087731 |
| 45 | 1 | 0 | -3.193543 | 2.454734  | 2.088609  |
| 46 | 1 | 0 | -1.132596 | 1.124790  | 2.140649  |
| 47 | 9 | 0 | -5.661283 | 2.471001  | -0.068040 |
| 48 | 9 | 0 | -4.714311 | 4.118259  | 0.982191  |
| 49 | 9 | 0 | -4.708291 | 4.061580  | -1.198809 |

(BINAP)Pd(Ar)(CF<sub>3</sub>) (2b):

SCF Done: E(RB3LYP) = -2741.97695795 A.U.

| Center<br>Number | Atomic<br>Number | Atomic<br>Type | Coordinates (Angstroms) |           |           |
|------------------|------------------|----------------|-------------------------|-----------|-----------|
|                  |                  |                | X                       | Y         | Z         |
| 1                | 6                | 0              | -1.833069               | -2.509159 | -1.377700 |
| 2                | 6                | 0              | -0.882020               | -2.696062 | -0.367589 |
| 3                | 6                | 0              | -0.355414               | -3.975807 | -0.141590 |
| 4                | 6                | 0              | -0.776944               | -5.055245 | -0.918656 |
| 5                | 6                | 0              | -1.724881               | -4.864532 | -1.927011 |
| 6                | 6                | 0              | -2.251778               | -3.592640 | -2.153831 |
| 7                | 15               | 0              | -0.376452               | -1.223574 | 0.682817  |
| 8                | 6                | 0              | -1.267685               | -1.513769 | 2.319409  |
| 9                | 6                | 0              | -2.116595               | -2.602563 | 2.540126  |
| 10               | 6                | 0              | -2.803989               | -2.724897 | 3.751716  |
| 11               | 6                | 0              | -2.645512               | -1.765726 | 4.751659  |
| 12               | 6                | 0              | -1.797771               | -0.675213 | 4.536625  |
| 13               | 6                | 0              | -1.119121               | -0.545836 | 3.325388  |
| 14               | 46               | 0              | -0.996636               | 1.209909  | 0.205742  |
| 15               | 15               | 0              | 1.441194                | 1.781533  | -0.268977 |
| 16               | 6                | 0              | 2.661134                | 1.932875  | 1.145531  |
| 17               | 6                | 0              | 2.159463                | 2.471944  | 2.339154  |
| 18               | 6                | 0              | 3.009851                | 2.681484  | 3.425910  |
| 19               | 6                | 0              | 4.363219                | 2.350607  | 3.331413  |
| 20               | 6                | 0              | 4.867192                | 1.819052  | 2.143075  |
| 21               | 6                | 0              | 4.020645                | 1.615755  | 1.051059  |
| 22               | 6                | 0              | -2.987040               | 0.777365  | 0.015644  |
| 23               | 6                | 0              | -3.528977               | 0.839691  | -1.279761 |
| 24               | 6                | 0              | -4.860360               | 0.498574  | -1.526307 |
| 25               | 6                | 0              | -5.685294               | 0.103564  | -0.469689 |
| 26               | 6                | 0              | -5.170629               | 0.067127  | 0.829191  |
| 27               | 6                | 0              | -3.837045               | 0.405803  | 1.066135  |
| 28               | 6                | 0              | -7.130410               | -0.210875 | -0.717402 |

|    |   |   |           |           |           |
|----|---|---|-----------|-----------|-----------|
| 29 | 9 | 0 | -7.924074 | 0.882136  | -0.593954 |
| 30 | 6 | 0 | -1.665238 | 3.116719  | 0.495040  |
| 31 | 9 | 0 | -0.624081 | 3.945387  | 0.869595  |
| 32 | 9 | 0 | -2.563752 | 3.232815  | 1.509894  |
| 33 | 9 | 0 | -2.239339 | 3.731284  | -0.583611 |
| 34 | 6 | 0 | 1.977509  | 0.436384  | -1.504917 |
| 35 | 6 | 0 | 2.238109  | -0.893881 | -1.172849 |
| 36 | 6 | 0 | 2.375571  | -1.873527 | -2.224740 |
| 37 | 6 | 0 | 2.266459  | -1.471209 | -3.595176 |
| 38 | 6 | 0 | 2.020232  | -0.108067 | -3.885057 |
| 39 | 6 | 0 | 1.875181  | 0.808742  | -2.875524 |
| 40 | 6 | 0 | 1.760036  | 3.374937  | -1.236256 |
| 41 | 6 | 0 | 0.698939  | 3.986928  | -1.915356 |
| 42 | 6 | 0 | 0.916902  | 5.148161  | -2.660170 |
| 43 | 6 | 0 | 2.191243  | 5.712406  | -2.727083 |
| 44 | 6 | 0 | 3.250133  | 5.111161  | -2.044067 |
| 45 | 6 | 0 | 3.036526  | 3.948261  | -1.302396 |
| 46 | 6 | 0 | 1.431083  | -1.597468 | 1.138188  |
| 47 | 6 | 0 | 2.467188  | -1.365391 | 0.237042  |
| 48 | 6 | 0 | 3.823968  | -1.658287 | 0.629478  |
| 49 | 6 | 0 | 4.091208  | -2.168975 | 1.940628  |
| 50 | 6 | 0 | 3.005239  | -2.389878 | 2.821825  |
| 51 | 6 | 0 | 1.718726  | -2.113615 | 2.431979  |
| 52 | 9 | 0 | -7.340147 | -0.697104 | -1.965162 |
| 53 | 9 | 0 | -7.609182 | -1.130573 | 0.155039  |
| 54 | 1 | 0 | 3.201801  | -2.787506 | 3.814649  |
| 55 | 6 | 0 | 5.429191  | -2.449427 | 2.329104  |
| 56 | 1 | 0 | -2.911012 | 1.158843  | -2.115716 |
| 57 | 1 | 0 | -5.257780 | 0.541054  | -2.536219 |
| 58 | 1 | 0 | -5.810579 | -0.231649 | 1.654405  |
| 59 | 1 | 0 | -3.464272 | 0.371170  | 2.084485  |
| 60 | 1 | 0 | 0.905260  | -2.296208 | 3.123119  |
| 61 | 1 | 0 | 1.676674  | 1.842356  | -3.129863 |
| 62 | 1 | 0 | 1.945484  | 0.207981  | -4.922820 |
| 63 | 6 | 0 | 2.410453  | -2.434813 | -4.629123 |
| 64 | 1 | 0 | 0.381565  | -4.130606 | 0.641402  |
| 65 | 1 | 0 | -0.364680 | -6.044269 | -0.736526 |
| 66 | 1 | 0 | -2.051743 | -5.705779 | -2.532369 |
| 67 | 1 | 0 | -2.991734 | -3.438268 | -2.934248 |
| 68 | 1 | 0 | -2.255238 | -1.524368 | -1.549297 |
| 69 | 1 | 0 | -2.255064 | -3.352568 | 1.768844  |
| 70 | 1 | 0 | -3.467024 | -3.571647 | 3.907746  |
| 71 | 1 | 0 | -3.182935 | -1.861752 | 5.691147  |
| 72 | 1 | 0 | -1.673765 | 0.081531  | 5.306488  |
| 73 | 1 | 0 | -0.476790 | 0.314860  | 3.158233  |
| 74 | 1 | 0 | 1.111232  | 2.750098  | 2.403216  |
| 75 | 1 | 0 | 2.613067  | 3.104132  | 4.345018  |
| 76 | 1 | 0 | 5.023354  | 2.508756  | 4.180083  |
| 77 | 1 | 0 | 5.918365  | 1.556129  | 2.062691  |
| 78 | 1 | 0 | 4.423046  | 1.200426  | 0.133411  |
| 79 | 1 | 0 | 3.867187  | 3.499785  | -0.767723 |
| 80 | 1 | 0 | 4.244724  | 5.547609  | -2.083871 |
| 81 | 1 | 0 | 2.357626  | 6.619573  | -3.301913 |
| 82 | 1 | 0 | 0.082988  | 5.616029  | -3.176191 |
| 83 | 1 | 0 | -0.301364 | 3.576489  | -1.849929 |
| 84 | 6 | 0 | 2.650308  | -3.756281 | -4.333961 |
| 85 | 1 | 0 | 2.325236  | -2.103660 | -5.661286 |
| 86 | 1 | 0 | 2.758757  | -4.486558 | -5.131080 |
| 87 | 6 | 0 | 2.750976  | -4.164799 | -2.983172 |
| 88 | 6 | 0 | 2.619382  | -3.252193 | -1.960302 |
| 89 | 1 | 0 | 2.932135  | -5.210442 | -2.749821 |
| 90 | 6 | 0 | 6.476013  | -2.238455 | 1.462449  |
| 91 | 1 | 0 | 5.607985  | -2.835480 | 3.329778  |
| 92 | 1 | 0 | 7.495233  | -2.457789 | 1.768395  |
| 93 | 6 | 0 | 6.221066  | -1.736225 | 0.163694  |
| 94 | 6 | 0 | 4.934509  | -1.456285 | -0.241057 |
| 95 | 1 | 0 | 7.048094  | -1.573181 | -0.522027 |
| 96 | 1 | 0 | 4.760945  | -1.075048 | -1.240618 |
| 97 | 1 | 0 | 2.695235  | -3.589425 | -0.933835 |



-----  
**TSrd (BINAP)**

SCF Done: E(RB3LYP) = -2741.93469554 A.U.

| Center<br>Number | Atomic<br>Number | Atomic<br>Type | Coordinates (Angstroms) |           |           |
|------------------|------------------|----------------|-------------------------|-----------|-----------|
|                  |                  |                | X                       | Y         | Z         |
| 1                | 6                | 0              | 4.609948                | -1.828115 | -0.736127 |
| 2                | 6                | 0              | 3.597365                | -1.975987 | 0.254773  |
| 3                | 6                | 0              | 3.972051                | -2.550132 | 1.512485  |
| 4                | 6                | 0              | 5.318612                | -2.947845 | 1.730403  |
| 5                | 6                | 0              | 6.269618                | -2.790672 | 0.749015  |
| 6                | 6                | 0              | 5.907122                | -2.224018 | -0.496320 |
| 7                | 6                | 0              | 2.981734                | -2.706088 | 2.512553  |
| 8                | 6                | 0              | 1.687793                | -2.306539 | 2.286822  |
| 9                | 6                | 0              | 1.293677                | -1.729524 | 1.048421  |
| 10               | 6                | 0              | 2.236223                | -1.561664 | 0.033128  |
| 11               | 15               | 0              | -0.495335               | -1.110741 | 0.852902  |
| 12               | 46               | 0              | -0.804820               | 1.375440  | 0.322798  |
| 13               | 6                | 0              | -1.973826               | 3.382549  | 0.453704  |
| 14               | 9                | 0              | -1.631661               | 3.979817  | -0.717930 |
| 15               | 6                | 0              | 1.881015                | -1.013354 | -1.322382 |
| 16               | 6                | 0              | 1.743097                | 0.350590  | -1.573306 |
| 17               | 6                | 0              | 1.383769                | 0.795560  | -2.878669 |
| 18               | 6                | 0              | 1.215178                | -0.085675 | -3.915402 |
| 19               | 6                | 0              | 1.388742                | -1.478094 | -3.717367 |
| 20               | 6                | 0              | 1.721908                | -1.952057 | -2.406927 |
| 21               | 6                | 0              | 1.238464                | -2.402455 | -4.784963 |
| 22               | 6                | 0              | 1.414068                | -3.751823 | -4.582079 |
| 23               | 6                | 0              | 1.745311                | -4.228225 | -3.292330 |
| 24               | 6                | 0              | 1.892622                | -3.355533 | -2.236603 |
| 25               | 15               | 0              | 1.664064                | 1.673423  | -0.222489 |
| 26               | 6                | 0              | 2.260602                | 3.246685  | -1.079880 |
| 27               | 6                | 0              | 1.667828                | 4.453071  | -0.686778 |
| 28               | 6                | 0              | 2.111162                | 5.664830  | -1.222992 |
| 29               | 6                | 0              | 3.142910                | 5.682115  | -2.161576 |
| 30               | 6                | 0              | 3.734007                | 4.481773  | -2.563579 |
| 31               | 6                | 0              | 3.298807                | 3.271137  | -2.023282 |
| 32               | 6                | 0              | -1.370074               | -2.489130 | -0.081964 |
| 33               | 6                | 0              | -2.595445               | -2.181907 | -0.687611 |
| 34               | 6                | 0              | -3.333046               | -3.175136 | -1.333799 |
| 35               | 6                | 0              | -2.842556               | -4.480930 | -1.395641 |
| 36               | 6                | 0              | -1.616191               | -4.790917 | -0.804021 |
| 37               | 6                | 0              | -0.883728               | -3.801298 | -0.144252 |
| 38               | 6                | 0              | -1.202265               | -1.324362 | 2.595694  |
| 39               | 6                | 0              | -1.810021               | -2.506000 | 3.038454  |
| 40               | 6                | 0              | -2.336206               | -2.588614 | 4.330410  |
| 41               | 6                | 0              | -2.259269               | -1.494277 | 5.193586  |
| 42               | 6                | 0              | -1.659465               | -0.310399 | 4.757934  |
| 43               | 6                | 0              | -1.141074               | -0.225450 | 3.464757  |
| 44               | 6                | 0              | -2.832176               | 1.644824  | 0.133473  |
| 45               | 6                | 0              | -3.272568               | 1.600298  | -1.205927 |
| 46               | 6                | 0              | -4.499367               | 1.025826  | -1.531378 |
| 47               | 6                | 0              | -5.331603               | 0.528454  | -0.523706 |
| 48               | 6                | 0              | -4.935607               | 0.633800  | 0.817538  |
| 49               | 6                | 0              | -3.712692               | 1.207224  | 1.145667  |
| 50               | 6                | 0              | -6.608375               | -0.165151 | -0.888771 |
| 51               | 9                | 0              | -7.515734               | -0.137396 | 0.112230  |
| 52               | 6                | 0              | 3.061408                | 1.414558  | 1.019836  |
| 53               | 6                | 0              | 2.717768                | 1.373869  | 2.375884  |
| 54               | 6                | 0              | 3.708129                | 1.287686  | 3.357354  |
| 55               | 6                | 0              | 5.052671                | 1.243041  | 2.989796  |
| 56               | 6                | 0              | 5.403433                | 1.283746  | 1.638069  |
| 57               | 6                | 0              | 4.414439                | 1.373465  | 0.658860  |
| 58               | 9                | 0              | -7.191712               | 0.377139  | -1.982266 |
| 59               | 9                | 0              | -6.404008               | -1.481010 | -1.183489 |
| 60               | 9                | 0              | -1.078496               | 3.830120  | 1.410538  |
| 61               | 9                | 0              | -3.133129               | 3.977720  | 0.838804  |

|    |   |   |           |           |           |
|----|---|---|-----------|-----------|-----------|
| 62 | 1 | 0 | 3.259062  | -3.147656 | 3.466966  |
| 63 | 1 | 0 | -2.649254 | 2.011892  | -1.992948 |
| 64 | 1 | 0 | -4.815133 | 0.973609  | -2.569014 |
| 65 | 1 | 0 | -5.588910 | 0.264597  | 1.601844  |
| 66 | 1 | 0 | -3.423176 | 1.286743  | 2.188689  |
| 67 | 1 | 0 | 0.950066  | -2.432803 | 3.070318  |
| 68 | 1 | 0 | 1.237359  | 1.855529  | -3.054524 |
| 69 | 1 | 0 | 0.946318  | 0.278605  | -4.904124 |
| 70 | 1 | 0 | 0.062996  | -4.054331 | 0.323477  |
| 71 | 1 | 0 | -1.228927 | -5.805589 | -0.850299 |
| 72 | 1 | 0 | -3.413691 | -5.254757 | -1.901813 |
| 73 | 1 | 0 | -4.291984 | -2.920364 | -1.775156 |
| 74 | 1 | 0 | -2.978336 | -1.168023 | -0.652847 |
| 75 | 1 | 0 | -1.881635 | -3.362531 | 2.375580  |
| 76 | 1 | 0 | -2.809602 | -3.510083 | 4.659328  |
| 77 | 1 | 0 | -2.671577 | -1.560280 | 6.196918  |
| 78 | 1 | 0 | -1.604765 | 0.550702  | 5.418852  |
| 79 | 1 | 0 | -0.702792 | 0.706637  | 3.114394  |
| 80 | 1 | 0 | 1.671220  | 1.411594  | 2.663832  |
| 81 | 1 | 0 | 3.425593  | 1.258360  | 4.406355  |
| 82 | 1 | 0 | 5.825367  | 1.178717  | 3.751336  |
| 83 | 1 | 0 | 6.448936  | 1.245993  | 1.344307  |
| 84 | 1 | 0 | 4.705330  | 1.412580  | -0.385604 |
| 85 | 1 | 0 | 3.759310  | 2.345130  | -2.354952 |
| 86 | 1 | 0 | 4.535198  | 4.486696  | -3.298179 |
| 87 | 1 | 0 | 3.482816  | 6.624471  | -2.582915 |
| 88 | 1 | 0 | 1.641201  | 6.593231  | -0.909915 |
| 89 | 1 | 0 | 0.855280  | 4.444363  | 0.031223  |
| 90 | 1 | 0 | 0.982114  | -2.019243 | -5.769794 |
| 91 | 1 | 0 | 1.298427  | -4.450934 | -5.405705 |
| 92 | 1 | 0 | 1.884042  | -5.294000 | -3.131843 |
| 93 | 1 | 0 | 5.582347  | -3.380232 | 2.692697  |
| 94 | 1 | 0 | 7.296302  | -3.099898 | 0.925194  |
| 95 | 1 | 0 | 6.659695  | -2.101524 | -1.270715 |
| 96 | 1 | 0 | 4.349486  | -1.395387 | -1.695171 |
| 97 | 1 | 0 | 2.149184  | -3.742170 | -1.257625 |

(BINAP)Pd(CF<sub>3</sub>)<sub>2</sub>

SCF Done: E(RB3LYP) = -2510.93326547 A.U.

| Center<br>Number | Atomic<br>Number | Atomic<br>Type | Coordinates (Angstroms) |           |           |
|------------------|------------------|----------------|-------------------------|-----------|-----------|
|                  |                  |                | X                       | Y         | Z         |
| 1                | 6                | 0              | -1.562398               | -3.322957 | 1.355749  |
| 2                | 6                | 0              | -0.349744               | -2.622142 | 1.346390  |
| 3                | 6                | 0              | 0.428350                | -2.574075 | 2.510515  |
| 4                | 6                | 0              | -0.007412               | -3.216105 | 3.670899  |
| 5                | 6                | 0              | -1.218662               | -3.909871 | 3.677326  |
| 6                | 6                | 0              | -1.994495               | -3.964318 | 2.517884  |
| 7                | 15               | 0              | 0.327430                | -1.794598 | -0.192188 |
| 8                | 6                | 0              | 0.967851                | -3.230704 | -1.233476 |
| 9                | 6                | 0              | 1.899136                | -2.949500 | -2.242792 |
| 10               | 6                | 0              | 2.394699                | -3.973760 | -3.050462 |
| 11               | 6                | 0              | 1.976109                | -5.290143 | -2.848718 |
| 12               | 6                | 0              | 1.059022                | -5.577030 | -1.836615 |
| 13               | 6                | 0              | 0.554241                | -4.552608 | -1.032834 |
| 14               | 46               | 0              | 2.124371                | -0.000117 | 0.000126  |
| 15               | 15               | 0              | 0.327601                | 1.794592  | 0.192077  |
| 16               | 6                | 0              | 0.968133                | 3.230906  | 1.232967  |
| 17               | 6                | 0              | 0.554718                | 4.552828  | 1.031980  |
| 18               | 6                | 0              | 1.059536                | 5.577343  | 1.835609  |
| 19               | 6                | 0              | 1.976467                | 5.290554  | 2.847879  |
| 20               | 6                | 0              | 2.394929                | 3.974174  | 3.049917  |
| 21               | 6                | 0              | 1.899330                | 2.949815  | 2.242407  |
| 22               | 6                | 0              | -1.159357               | 1.167691  | 1.202192  |
| 23               | 6                | 0              | -1.247087               | 1.599059  | 2.554882  |
| 24               | 6                | 0              | -2.219620               | 1.125584  | 3.398780  |
| 25               | 6                | 0              | -3.180817               | 0.191839  | 2.944153  |

|    |   |   |           |           |           |
|----|---|---|-----------|-----------|-----------|
| 26 | 6 | 0 | -3.116484 | -0.256525 | 1.585639  |
| 27 | 6 | 0 | -2.078005 | 0.237527  | 0.713658  |
| 28 | 6 | 0 | -4.204284 | -0.294327 | 3.801944  |
| 29 | 6 | 0 | -5.144358 | -1.187600 | 3.344716  |
| 30 | 6 | 0 | -5.090839 | -1.634561 | 2.003199  |
| 31 | 6 | 0 | -4.106069 | -1.185822 | 1.151414  |
| 32 | 6 | 0 | -2.078113 | -0.237307 | -0.713349 |
| 33 | 6 | 0 | -1.159613 | -1.167475 | -1.202097 |
| 34 | 6 | 0 | -1.247541 | -1.598704 | -2.554821 |
| 35 | 6 | 0 | -2.220109 | -1.125039 | -3.398558 |
| 36 | 6 | 0 | -3.181212 | -0.191266 | -2.943717 |
| 37 | 6 | 0 | -3.116744 | 0.256872  | -1.585136 |
| 38 | 6 | 0 | -4.106246 | 1.186138  | -1.150686 |
| 39 | 6 | 0 | -5.091075 | 1.635058  | -2.002317 |
| 40 | 6 | 0 | -5.144716 | 1.188335  | -3.343897 |
| 41 | 6 | 0 | -4.204700 | 0.295102  | -3.801348 |
| 42 | 6 | 0 | -0.349502 | 2.621771  | -1.346731 |
| 43 | 6 | 0 | 0.428519  | 2.573245  | -2.510879 |
| 44 | 6 | 0 | -0.007266 | 3.214879  | -3.671472 |
| 45 | 6 | 0 | -1.218486 | 3.908694  | -3.678117 |
| 46 | 6 | 0 | -1.994248 | 3.963608  | -2.518654 |
| 47 | 6 | 0 | -1.562111 | 3.322670  | -1.356306 |
| 48 | 1 | 0 | -2.265107 | 1.474109  | 4.427787  |
| 49 | 1 | 0 | -0.531345 | 2.319606  | 2.929617  |
| 50 | 1 | 0 | -0.531929 | -2.319312 | -2.929696 |
| 51 | 1 | 0 | -2.265729 | -1.473422 | -4.427607 |
| 52 | 1 | 0 | -2.174610 | 3.363230  | -0.460820 |
| 53 | 1 | 0 | -2.940453 | 4.497486  | -2.518259 |
| 54 | 1 | 0 | -1.557262 | 4.405793  | -4.583155 |
| 55 | 1 | 0 | 0.603640  | 3.172324  | -4.569023 |
| 56 | 1 | 0 | 1.383056  | 2.058986  | -2.498042 |
| 57 | 1 | 0 | -0.149611 | 4.792972  | 0.242865  |
| 58 | 1 | 0 | 0.736423  | 6.600957  | 1.665207  |
| 59 | 1 | 0 | 2.370094  | 6.089821  | 3.470129  |
| 60 | 1 | 0 | 3.120900  | 3.742428  | 3.824250  |
| 61 | 1 | 0 | 2.254454  | 1.934157  | 2.385616  |
| 62 | 1 | 0 | 1.382933  | -2.059892 | 2.497730  |
| 63 | 1 | 0 | 0.603528  | -3.173906 | 4.568443  |
| 64 | 1 | 0 | -1.557414 | -4.407310 | 4.582188  |
| 65 | 1 | 0 | -2.940717 | -4.498170 | 2.517362  |
| 66 | 1 | 0 | -2.174871 | -3.363197 | 0.460226  |
| 67 | 1 | 0 | -0.150285 | -4.792859 | -0.243931 |
| 68 | 1 | 0 | 0.735739  | -6.600635 | -1.666478 |
| 69 | 1 | 0 | 2.369720  | -6.089332 | -3.471082 |
| 70 | 1 | 0 | 3.120739  | -3.741925 | -3.824704 |
| 71 | 1 | 0 | 2.254318  | -1.933851 | -2.385822 |
| 72 | 1 | 0 | -4.230497 | -0.058902 | -4.829116 |
| 73 | 1 | 0 | -5.926491 | 1.550782  | -4.005723 |
| 74 | 1 | 0 | -5.834720 | 2.339773  | -1.639781 |
| 75 | 1 | 0 | -4.229994 | 0.059867  | 4.829649  |
| 76 | 1 | 0 | -5.926107 | -1.549901 | 4.006654  |
| 77 | 1 | 0 | -5.834541 | -2.339319 | 1.640866  |
| 78 | 1 | 0 | -4.084847 | -1.543058 | 0.128926  |
| 79 | 1 | 0 | -4.084922 | 1.543241  | -0.128156 |
| 80 | 6 | 0 | 3.627669  | -1.364018 | 0.312464  |
| 81 | 6 | 0 | 3.627716  | 1.363799  | -0.312033 |
| 82 | 9 | 0 | 4.584579  | -0.915103 | 1.168426  |
| 83 | 9 | 0 | 3.139761  | -2.509368 | 0.911203  |
| 84 | 9 | 0 | 4.285562  | -1.791605 | -0.797099 |
| 85 | 9 | 0 | 4.285575  | 1.791275  | 0.797612  |
| 86 | 9 | 0 | 4.584584  | 0.914993  | -1.167990 |
| 87 | 9 | 0 | 3.139791  | 2.509266  | -0.910547 |

(BINAP)Pd(Ar)<sub>2</sub>

SCF Done: E(RB3LYP) = -2973.01668151 A.U.

| Center<br>Number | Atomic<br>Number | Atomic<br>Type | Coordinates (Angstroms) |   |   |
|------------------|------------------|----------------|-------------------------|---|---|
|                  |                  |                | X                       | Y | Z |

|    |    |   |           |           |           |
|----|----|---|-----------|-----------|-----------|
| 1  | 6  | 0 | -5.441406 | 1.209223  | -0.003847 |
| 2  | 6  | 0 | -4.624450 | 0.301252  | -0.738821 |
| 3  | 6  | 0 | -5.115456 | -0.159428 | -2.002892 |
| 4  | 6  | 0 | -6.376743 | 0.291784  | -2.477223 |
| 5  | 6  | 0 | -7.136348 | 1.170298  | -1.740436 |
| 6  | 6  | 0 | -6.658384 | 1.632789  | -0.491100 |
| 7  | 6  | 0 | -4.325859 | -1.063960 | -2.752855 |
| 8  | 6  | 0 | -3.103845 | -1.480027 | -2.287348 |
| 9  | 6  | 0 | -2.589766 | -1.024596 | -1.042422 |
| 10 | 6  | 0 | -3.338773 | -0.147981 | -0.261266 |
| 11 | 15 | 0 | -0.875753 | -1.626151 | -0.474628 |
| 12 | 46 | 0 | 0.996553  | 0.071706  | -0.060818 |
| 13 | 6  | 0 | 2.409114  | -1.408317 | 0.038253  |
| 14 | 6  | 0 | 2.810683  | -1.931516 | 1.278793  |
| 15 | 6  | 0 | 3.727768  | -2.980700 | 1.371351  |
| 16 | 6  | 0 | 4.278870  | -3.527799 | 0.210853  |
| 17 | 6  | 0 | 3.910315  | -3.009042 | -1.034341 |
| 18 | 6  | 0 | 2.990578  | -1.963153 | -1.113867 |
| 19 | 6  | 0 | 5.302723  | -4.619735 | 0.289164  |
| 20 | 9  | 0 | 5.150347  | -5.530048 | -0.704776 |
| 21 | 6  | 0 | -2.921529 | 0.313609  | 1.109240  |
| 22 | 6  | 0 | -1.990361 | 1.328902  | 1.334182  |
| 23 | 6  | 0 | -1.773328 | 1.803092  | 2.658270  |
| 24 | 6  | 0 | -2.443326 | 1.274709  | 3.731970  |
| 25 | 6  | 0 | -3.367783 | 0.216680  | 3.558431  |
| 26 | 6  | 0 | -3.612484 | -0.272005 | 2.234335  |
| 27 | 6  | 0 | -4.054494 | -0.356150 | 4.662287  |
| 28 | 6  | 0 | -4.950882 | -1.383041 | 4.480023  |
| 29 | 6  | 0 | -5.190923 | -1.879538 | 3.177247  |
| 30 | 6  | 0 | -4.545056 | -1.339082 | 2.087567  |
| 31 | 15 | 0 | -0.739303 | 1.941108  | 0.039114  |
| 32 | 6  | 0 | -0.193990 | 3.632244  | 0.689627  |
| 33 | 6  | 0 | 0.875675  | 3.686006  | 1.594385  |
| 34 | 6  | 0 | 1.319822  | 4.910254  | 2.096664  |
| 35 | 6  | 0 | 0.706533  | 6.097210  | 1.694218  |
| 36 | 6  | 0 | -0.352529 | 6.052457  | 0.786612  |
| 37 | 6  | 0 | -0.801271 | 4.828508  | 0.286145  |
| 38 | 6  | 0 | -1.318638 | -2.902627 | 0.830644  |
| 39 | 6  | 0 | -0.615493 | -2.911421 | 2.039330  |
| 40 | 6  | 0 | -0.921918 | -3.853212 | 3.024757  |
| 41 | 6  | 0 | -1.932088 | -4.790290 | 2.808093  |
| 42 | 6  | 0 | -2.641961 | -4.782592 | 1.604423  |
| 43 | 6  | 0 | -2.340406 | -3.840550 | 0.620904  |
| 44 | 6  | 0 | -0.283238 | -2.647544 | -1.943691 |
| 45 | 6  | 0 | -0.071372 | -4.027637 | -1.872956 |
| 46 | 6  | 0 | 0.447007  | -4.718538 | -2.972540 |
| 47 | 6  | 0 | 0.751513  | -4.040143 | -4.151846 |
| 48 | 6  | 0 | 0.546221  | -2.659624 | -4.227721 |
| 49 | 6  | 0 | 0.043297  | -1.966881 | -3.127304 |
| 50 | 6  | 0 | -1.641353 | 2.393797  | -1.543270 |
| 51 | 6  | 0 | -0.958487 | 2.189519  | -2.749631 |
| 52 | 6  | 0 | -1.531874 | 2.576163  | -3.962719 |
| 53 | 6  | 0 | -2.796923 | 3.165682  | -3.980900 |
| 54 | 6  | 0 | -3.485348 | 3.368328  | -2.782999 |
| 55 | 6  | 0 | -2.909284 | 2.988414  | -1.569350 |
| 56 | 9  | 0 | 6.569340  | -4.146784 | 0.177641  |
| 57 | 9  | 0 | 5.245360  | -5.296151 | 1.461083  |
| 58 | 1  | 0 | -4.700697 | -1.429469 | -3.705974 |
| 59 | 1  | 0 | 2.412424  | -1.516268 | 2.202227  |
| 60 | 1  | 0 | 4.011709  | -3.375089 | 2.342427  |
| 61 | 1  | 0 | 4.338150  | -3.427231 | -1.941272 |
| 62 | 1  | 0 | 2.723417  | -1.584116 | -2.095468 |
| 63 | 1  | 0 | -2.521516 | -2.173816 | -2.880544 |
| 64 | 1  | 0 | -1.066504 | 2.607135  | 2.823549  |
| 65 | 1  | 0 | -2.266656 | 1.665786  | 4.731162  |
| 66 | 1  | 0 | -2.901051 | -3.836951 | -0.309861 |
| 67 | 1  | 0 | -3.432324 | -5.508398 | 1.431848  |
| 68 | 1  | 0 | -2.168633 | -5.523690 | 3.574272  |

|     |   |   |           |           |           |
|-----|---|---|-----------|-----------|-----------|
| 69  | 1 | 0 | -0.368864 | -3.852288 | 3.959958  |
| 70  | 1 | 0 | 0.172830  | -2.185817 | 2.205161  |
| 71  | 1 | 0 | -0.297070 | -4.569330 | -0.961008 |
| 72  | 1 | 0 | 0.614415  | -5.789729 | -2.900328 |
| 73  | 1 | 0 | 1.153192  | -4.579848 | -5.005055 |
| 74  | 1 | 0 | 0.787597  | -2.120376 | -5.139919 |
| 75  | 1 | 0 | -0.098235 | -0.890950 | -3.188761 |
| 76  | 1 | 0 | 0.027064  | 1.731753  | -2.736201 |
| 77  | 1 | 0 | -0.989691 | 2.416063  | -4.890775 |
| 78  | 1 | 0 | -3.245911 | 3.464394  | -4.924281 |
| 79  | 1 | 0 | -4.474990 | 3.816537  | -2.789500 |
| 80  | 1 | 0 | -3.455858 | 3.148975  | -0.645732 |
| 81  | 1 | 0 | -1.616709 | 4.817896  | -0.427778 |
| 82  | 1 | 0 | -0.831869 | 6.971833  | 0.460661  |
| 83  | 1 | 0 | 1.058670  | 7.051362  | 2.076807  |
| 84  | 1 | 0 | 2.158802  | 4.932638  | 2.786330  |
| 85  | 1 | 0 | 1.381766  | 2.774226  | 1.888238  |
| 86  | 1 | 0 | -3.853666 | 0.034978  | 5.656810  |
| 87  | 1 | 0 | -5.470750 | -1.816144 | 5.330120  |
| 88  | 1 | 0 | -5.891433 | -2.697748 | 3.034347  |
| 89  | 1 | 0 | -6.729318 | -0.072734 | -3.439131 |
| 90  | 1 | 0 | -8.099902 | 1.508621  | -2.111463 |
| 91  | 1 | 0 | -7.258941 | 2.325924  | 0.091748  |
| 92  | 1 | 0 | -5.096769 | 1.574523  | 0.956386  |
| 93  | 1 | 0 | -4.740176 | -1.740712 | 1.100780  |
| 94  | 6 | 0 | 2.647187  | 1.280018  | 0.023700  |
| 95  | 6 | 0 | 2.951132  | 2.096885  | -1.078999 |
| 96  | 6 | 0 | 4.022813  | 2.991652  | -1.055536 |
| 97  | 6 | 0 | 4.827016  | 3.089212  | 0.082330  |
| 98  | 6 | 0 | 4.554896  | 2.275178  | 1.185868  |
| 99  | 6 | 0 | 3.487246  | 1.377715  | 1.146275  |
| 100 | 1 | 0 | 2.343689  | 2.048767  | -1.979449 |
| 101 | 1 | 0 | 4.236106  | 3.610911  | -1.921891 |
| 102 | 6 | 0 | 5.932630  | 4.099120  | 0.146873  |
| 103 | 1 | 0 | 5.189135  | 2.330119  | 2.066241  |
| 104 | 1 | 0 | 3.320695  | 0.737180  | 2.007877  |
| 105 | 9 | 0 | 6.967454  | 3.676841  | 0.911096  |
| 106 | 9 | 0 | 6.430130  | 4.395656  | -1.076733 |
| 107 | 9 | 0 | 5.517177  | 5.275691  | 0.686818  |

TS<sup>Ar-Ar</sup>(BINAP)

SCF Done: E(RB3LYP) = -2973.00542542 A.U.

| Center<br>Number | Atomic<br>Number | Atomic<br>Type | Coordinates (Angstroms) |           |           |
|------------------|------------------|----------------|-------------------------|-----------|-----------|
|                  |                  |                | X                       | Y         | Z         |
| 1                | 6                | 0              | -3.329437               | 1.543056  | -1.210562 |
| 2                | 6                | 0              | -2.912872               | 0.953198  | 0.002657  |
| 3                | 6                | 0              | -3.444107               | 1.495005  | 1.195052  |
| 4                | 6                | 0              | -4.300997               | 2.591766  | 1.179546  |
| 5                | 6                | 0              | -4.679444               | 3.173071  | -0.036776 |
| 6                | 6                | 0              | -4.192481               | 2.633862  | -1.233047 |
| 7                | 46               | 0              | -1.022799               | 0.084889  | 0.148107  |
| 8                | 15               | 0              | 0.743019                | 1.901794  | -0.115471 |
| 9                | 6                | 0              | 1.838304                | 2.487807  | 1.304640  |
| 10               | 6                | 0              | 1.465274                | 2.124069  | 2.603106  |
| 11               | 6                | 0              | 2.170420                | 2.609532  | 3.707036  |
| 12               | 6                | 0              | 3.255537                | 3.465402  | 3.519182  |
| 13               | 6                | 0              | 3.631252                | 3.836095  | 2.225538  |
| 14               | 6                | 0              | 2.923613                | 3.355023  | 1.124334  |
| 15               | 6                | 0              | -5.533340               | 4.402394  | -0.051049 |
| 16               | 9                | 0              | -4.787377               | 5.542809  | 0.049439  |
| 17               | 15               | 0              | 0.842034                | -1.650249 | 0.625388  |
| 18               | 6                | 0              | 0.328131                | -2.528290 | 2.218720  |
| 19               | 6                | 0              | 0.494581                | -3.902267 | 2.428760  |
| 20               | 6                | 0              | 0.065214                | -4.491899 | 3.621111  |
| 21               | 6                | 0              | -0.528076               | -3.715751 | 4.617357  |
| 22               | 6                | 0              | -0.699881               | -2.344260 | 4.414660  |

|    |   |   |           |           |           |
|----|---|---|-----------|-----------|-----------|
| 23 | 6 | 0 | -0.282814 | -1.758184 | 3.219338  |
| 24 | 6 | 0 | 2.583347  | -1.009317 | 1.053373  |
| 25 | 6 | 0 | 3.139690  | -1.334034 | 2.320761  |
| 26 | 6 | 0 | 4.358334  | -0.840691 | 2.716461  |
| 27 | 6 | 0 | 5.099836  | 0.019560  | 1.870893  |
| 28 | 6 | 0 | 4.562652  | 0.355049  | 0.586086  |
| 29 | 6 | 0 | 3.286663  | -0.176280 | 0.182423  |
| 30 | 6 | 0 | 6.356194  | 0.551015  | 2.268450  |
| 31 | 6 | 0 | 7.065751  | 1.385480  | 1.436495  |
| 32 | 6 | 0 | 6.539886  | 1.724644  | 0.166902  |
| 33 | 6 | 0 | 5.324745  | 1.224678  | -0.245976 |
| 34 | 6 | 0 | 2.793580  | 0.142932  | -1.202702 |
| 35 | 6 | 0 | 1.802462  | 1.089659  | -1.454007 |
| 36 | 6 | 0 | 1.361088  | 1.312492  | -2.791030 |
| 37 | 6 | 0 | 1.928221  | 0.655314  | -3.852121 |
| 38 | 6 | 0 | 2.972115  | -0.281510 | -3.649054 |
| 39 | 6 | 0 | 3.407400  | -0.550071 | -2.310775 |
| 40 | 6 | 0 | 4.451393  | -1.502415 | -2.135591 |
| 41 | 6 | 0 | 5.030638  | -2.136589 | -3.212751 |
| 42 | 6 | 0 | 4.597418  | -1.862337 | -4.530693 |
| 43 | 6 | 0 | 3.585306  | -0.954055 | -4.739202 |
| 44 | 6 | 0 | 1.169084  | -3.088929 | -0.542002 |
| 45 | 6 | 0 | 0.145876  | -3.468685 | -1.419704 |
| 46 | 6 | 0 | 0.320069  | -4.560262 | -2.272897 |
| 47 | 6 | 0 | 1.517745  | -5.277020 | -2.260182 |
| 48 | 6 | 0 | 2.542282  | -4.900429 | -1.389418 |
| 49 | 6 | 0 | 2.369706  | -3.811832 | -0.532377 |
| 50 | 6 | 0 | -2.791815 | -1.020066 | -0.043653 |
| 51 | 6 | 0 | -3.069224 | -1.580938 | -1.310555 |
| 52 | 6 | 0 | -3.804522 | -2.755001 | -1.443351 |
| 53 | 6 | 0 | -4.298573 | -3.408260 | -0.308547 |
| 54 | 6 | 0 | -4.049474 | -2.864762 | 0.956208  |
| 55 | 6 | 0 | -3.314147 | -1.689714 | 1.082799  |
| 56 | 6 | 0 | -5.143830 | -4.636735 | -0.456966 |
| 57 | 9 | 0 | -4.774311 | -5.378679 | -1.529301 |
| 58 | 9 | 0 | -5.073902 | -5.439396 | 0.630908  |
| 59 | 9 | 0 | -6.456012 | -4.339604 | -0.632410 |
| 60 | 6 | 0 | 0.254630  | 3.568179  | -0.853702 |
| 61 | 6 | 0 | -0.988548 | 4.089601  | -0.476640 |
| 62 | 6 | 0 | -1.395599 | 5.349626  | -0.923211 |
| 63 | 6 | 0 | -0.560567 | 6.098960  | -1.752030 |
| 64 | 6 | 0 | 0.682349  | 5.586352  | -2.133256 |
| 65 | 6 | 0 | 1.089794  | 4.328810  | -1.685944 |
| 66 | 9 | 0 | -6.248510 | 4.520322  | -1.191803 |
| 67 | 9 | 0 | -6.404974 | 4.436351  | 0.982226  |
| 68 | 1 | 0 | 4.766662  | -1.107479 | 3.688523  |
| 69 | 1 | 0 | -2.707511 | -1.089430 | -2.209476 |
| 70 | 1 | 0 | -3.992814 | -3.169906 | -2.429348 |
| 71 | 1 | 0 | -4.423067 | -3.368407 | 1.842615  |
| 72 | 1 | 0 | -3.139881 | -1.292539 | 2.078217  |
| 73 | 1 | 0 | 2.590628  | -1.986602 | 2.989181  |
| 74 | 1 | 0 | 0.560009  | 2.020550  | -2.972099 |
| 75 | 1 | 0 | 1.580918  | 0.849196  | -4.864239 |
| 76 | 1 | 0 | 3.171286  | -3.527107 | 0.142845  |
| 77 | 1 | 0 | 3.478045  | -5.453164 | -1.376053 |
| 78 | 1 | 0 | 1.653307  | -6.125084 | -2.926119 |
| 79 | 1 | 0 | -0.482356 | -4.848196 | -2.946728 |
| 80 | 1 | 0 | -0.788392 | -2.916213 | -1.430899 |
| 81 | 1 | 0 | 0.953621  | -4.518475 | 1.662741  |
| 82 | 1 | 0 | 0.194888  | -5.560951 | 3.767710  |
| 83 | 1 | 0 | -0.861108 | -4.176768 | 5.543330  |
| 84 | 1 | 0 | -1.167771 | -1.732939 | 5.182012  |
| 85 | 1 | 0 | -0.439814 | -0.695366 | 3.053528  |
| 86 | 1 | 0 | 0.615884  | 1.462638  | 2.747202  |
| 87 | 1 | 0 | 1.868642  | 2.319914  | 4.710111  |
| 88 | 1 | 0 | 3.805347  | 3.846104  | 4.375824  |
| 89 | 1 | 0 | 4.476009  | 4.502212  | 2.072722  |
| 90 | 1 | 0 | 3.219830  | 3.662438  | 0.126759  |
| 91 | 1 | 0 | 2.052192  | 3.936748  | -2.001913 |

|     |   |   |           |           |           |
|-----|---|---|-----------|-----------|-----------|
| 92  | 1 | 0 | 1.336432  | 6.164819  | -2.780755 |
| 93  | 1 | 0 | -0.877302 | 7.076764  | -2.105225 |
| 94  | 1 | 0 | -2.372040 | 5.725390  | -0.633060 |
| 95  | 1 | 0 | -1.646082 | 3.509002  | 0.161223  |
| 96  | 1 | 0 | 3.237057  | -0.734181 | -5.745622 |
| 97  | 1 | 0 | 5.061918  | -2.369971 | -5.371554 |
| 98  | 1 | 0 | 5.828094  | -2.856029 | -3.047382 |
| 99  | 1 | 0 | 6.745915  | 0.283631  | 3.247787  |
| 100 | 1 | 0 | 8.026524  | 1.785215  | 1.749215  |
| 101 | 1 | 0 | 7.101140  | 2.385276  | -0.488520 |
| 102 | 1 | 0 | 4.936700  | 1.496222  | -1.220989 |
| 103 | 1 | 0 | 4.799446  | -1.726949 | -1.134646 |
| 104 | 1 | 0 | -3.184959 | 1.051086  | 2.152171  |
| 105 | 1 | 0 | -4.684033 | 2.994699  | 2.112595  |
| 106 | 1 | 0 | -4.486595 | 3.072470  | -2.181742 |
| 107 | 1 | 0 | -2.973044 | 1.144779  | -2.155871 |

---
